# Supplementary material
Source: PubMed Central journal article supplement (PMC3057868)
Supplement: NIHMS266940-supplement-1.pdf [file NIHMS266940-supplement-1.pdf]

## Supplementary Information

### The draft genome of the parasitic nematode *Trichinella spiralis*

Makedonka Mitreva<sup>1,2\*</sup>, Douglas P. Jasmer<sup>3</sup>, Dante S. Zarlenga<sup>4</sup>, Zhengyuan Wang<sup>1</sup>, Sahar Abubucker<sup>1</sup>, John Martin<sup>1</sup>, Christina M. Taylor<sup>1</sup>, Yong Yin<sup>1,‡</sup>, Lucinda Fulton<sup>1,2</sup>, Pat Minx<sup>1</sup>, Shiaw-Pyng Yang<sup>1,‡</sup>, Wesley C. Warren<sup>1,2</sup>, Robert S. Fulton<sup>1,2</sup>, Veena Bhonagiri<sup>1</sup>, Xu Zhang<sup>1</sup>, Kym Hallsworth-Pepin<sup>1</sup>, Sandra W. Clifton<sup>1,2</sup>, James P. McCarter<sup>2,5</sup>, Judith Appleton<sup>6</sup>, Elaine R. Mardis<sup>1,2</sup> & Richard K. Wilson<sup>1,2\*</sup>

<sup>1</sup>The Genome Center, Washington University School of Medicine, St. Louis, MO 63108. <sup>2</sup>Department of Genetics, Washington University School of Medicine, St. Louis, MO 63108. <sup>3</sup>Department of Veterinary Microbiology and Pathology, Washington State University, Pullman, Washington 99164. <sup>4</sup>U.S. Department of Agriculture, Animal Parasitic Disease Laboratory, Beltsville, Maryland 20705. <sup>5</sup>Divergence. Inc., St. Louis, MO 63132. <sup>6</sup>James A. Baker Institute for Animal Health, College of Veterinary Medicine, Cornell University, Hungerford Hill Road, Ithaca, New York 14853. ‡Present address: Monsanto Company, 700 Chesterfield Parkway West, St. Louis, MO 63017, USA.

\*To whom correspondence should be addressed. E-mail: [rwilson@genome.wustl.edu](mailto:rwilson@genome.wustl.edu); [mmitreva@genome.wustl.edu](mailto:mmitreva@genome.wustl.edu)

**I - Supplementary Figures 1-14 (p.g. 2-15)**

**II - Supplementary Tables 1-13 (p.g. 16-63)**

**III - Supplementary Note (p.g. 64-70)**

**IV – References for supplementary information (p.g. 71-72)**

## I – Supplementary Figures 1-14

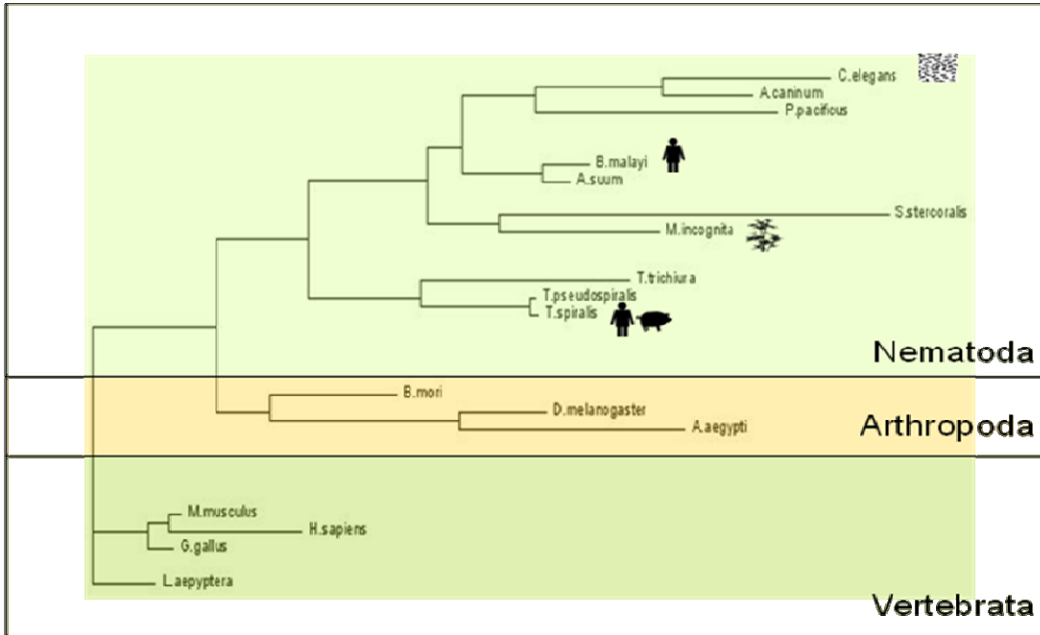

**Supplementary Fig.1.** The phylogenetic tree based on 18s rRNA sequences of 17 metazoan species. The rRNA sequences were collected from the SILVA database (<http://www.arb-silva.de/>). Collected sequences were re-aligned using CLUSTALX with manual editing. The phylogeny was reconstructed using DNAML of PHYLIP (ref). The accession numbers are: DQ442665, AF036587, AJ920347, M97573, U60231, AY988440, DQ118536, AX664486, AAQA01004529, X03680, AADN02004142, CABB01000393, AADK01009766, AADB02002333, AC170254, M84229, AY851258. The species with associated trophic ecology were used as representatives that span the phylum and analyzed in this study.

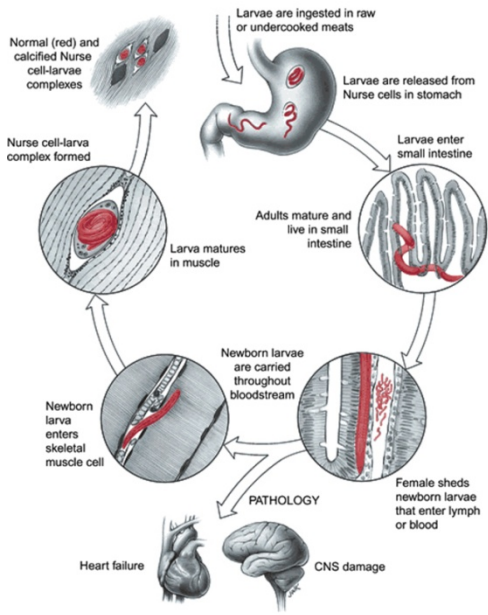

**Supplementary Fig.2.** Life cycle of *Trichinella spiralis*<sup>1</sup>.

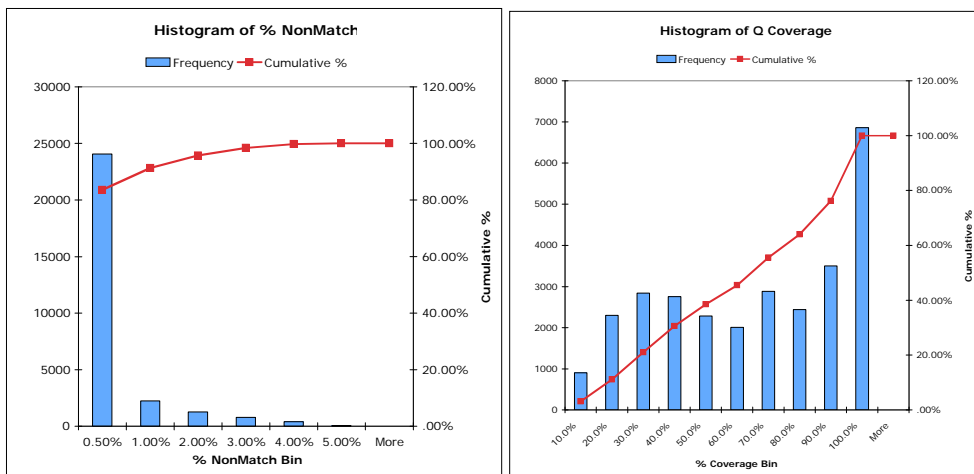

**Supplementary Fig. 3.** Histograms showing the % nonMatch and % Q Coverage. “% NonMatch” indicates that the mappings are indeed high quality, in that 84% of all the EST-cDNA mappings have non-match ratios (defined as non-match bases/total bases of the mapped regions) of less than 0.5%. As expected, the % Query Coverage is more dispersed, as shown in “Histogram of % Q Coverage”.

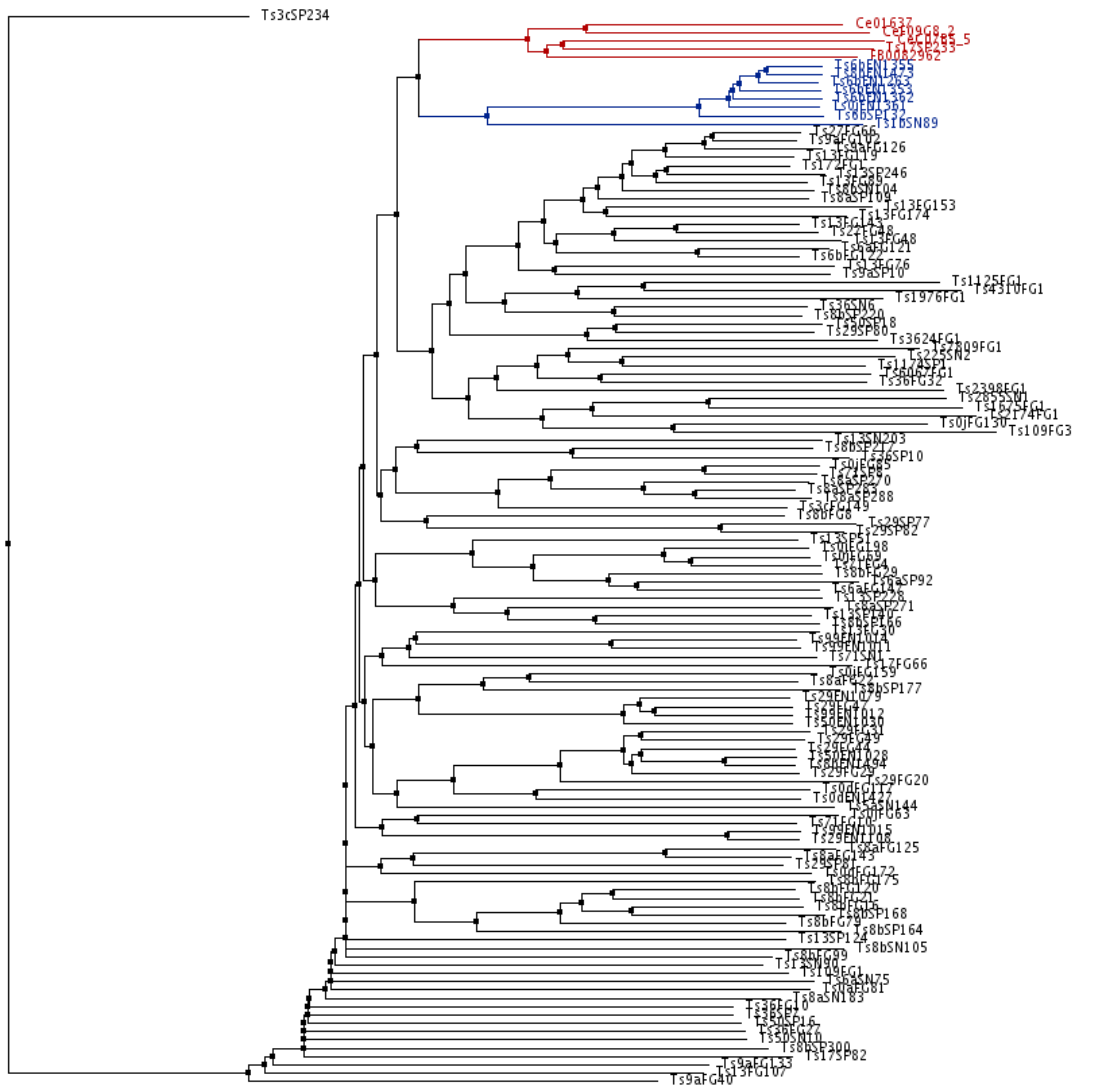

**Supplementary Fig.4.** Similarity clustering (neighbor joining unrooted tree) of *T. spiralis* and *C. elegans* DNase II-like genes.

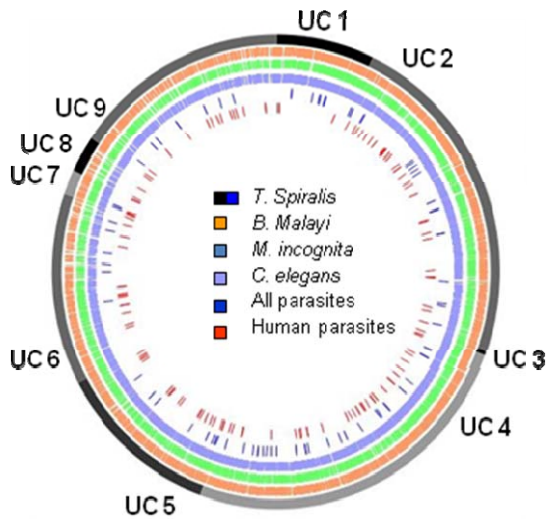

**Supplementary Fig. 5.** Distribution of Orthologs on the 9 *T. spiralis* ultracontigs (grey). *B. malayi*, *M. incognita* and *C. elegans* orthologous genes are in orange, green and violet respectively. Orthologous genes conserved among the three parasites (*M. incognita*, *B. malayi* and *T. spiralis*) are marked in blue; the orthologous proteins among the two human parasites (*B. malayi* and *T. spiralis*) are marked in red.

**a**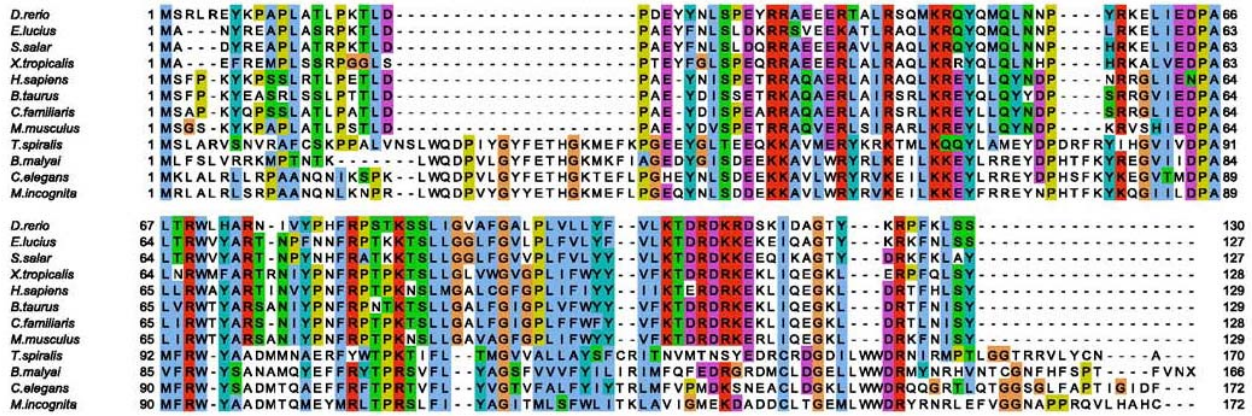**b**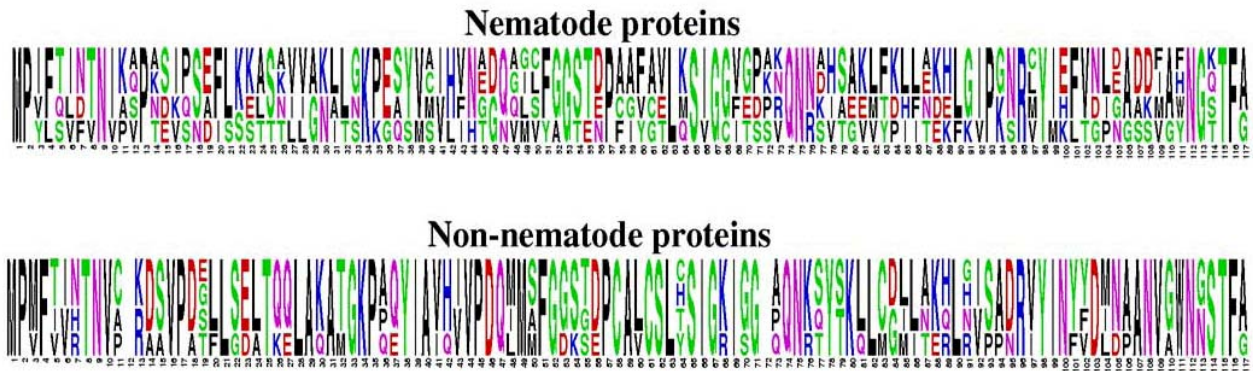

**Supplementary Fig. 6.** Pan-Phylum molecular characteristics. **(a)** Multiple alignment of a family (OrthoMCL5157) associated with K03960 (NADH dehydrogenase 1 beta subcomplex 4) shows nematode-specific insertions. **(b)** Conservation profiling of genes encoding MIF-1 in nematodes (OrthoMCL5321). Nematode-specific conserved residues were observed (e.g. positions 53, 93), despite the higher sequence distance among the nematode (1.202) relative to the vertebrate (0.395) species (human, chicken, frog and zebrafish) spanning approximately the same lengths of time. The overall distance among nematode and vertebrate proteins was 1.1852. Accession numbers and other relevant information are available as Supplementary Note online.

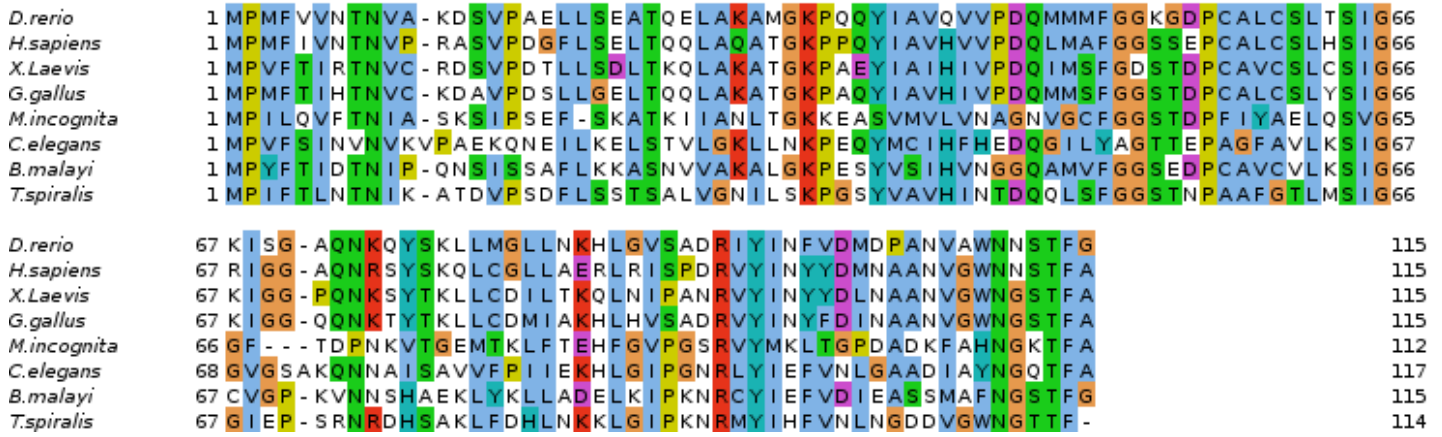

**Supplementary Fig. 7.** Multiple alignment of a family (ORTHOMCL5321) associated with MIF-1 in nematodes. The sequence distance among nematode members is 1.202 and among vertebrate representatives is 0.395. The overall distance among the nematodes and the vertebrate species is 1.185. Accession numbers or gene IDs of the aligned sequences are: Q02BR7.1, Q6FHV0.1, Q76BK2.1, Q02960.3, Minc15801, Y5613A.3, 14930.m00337, TS\_06335.



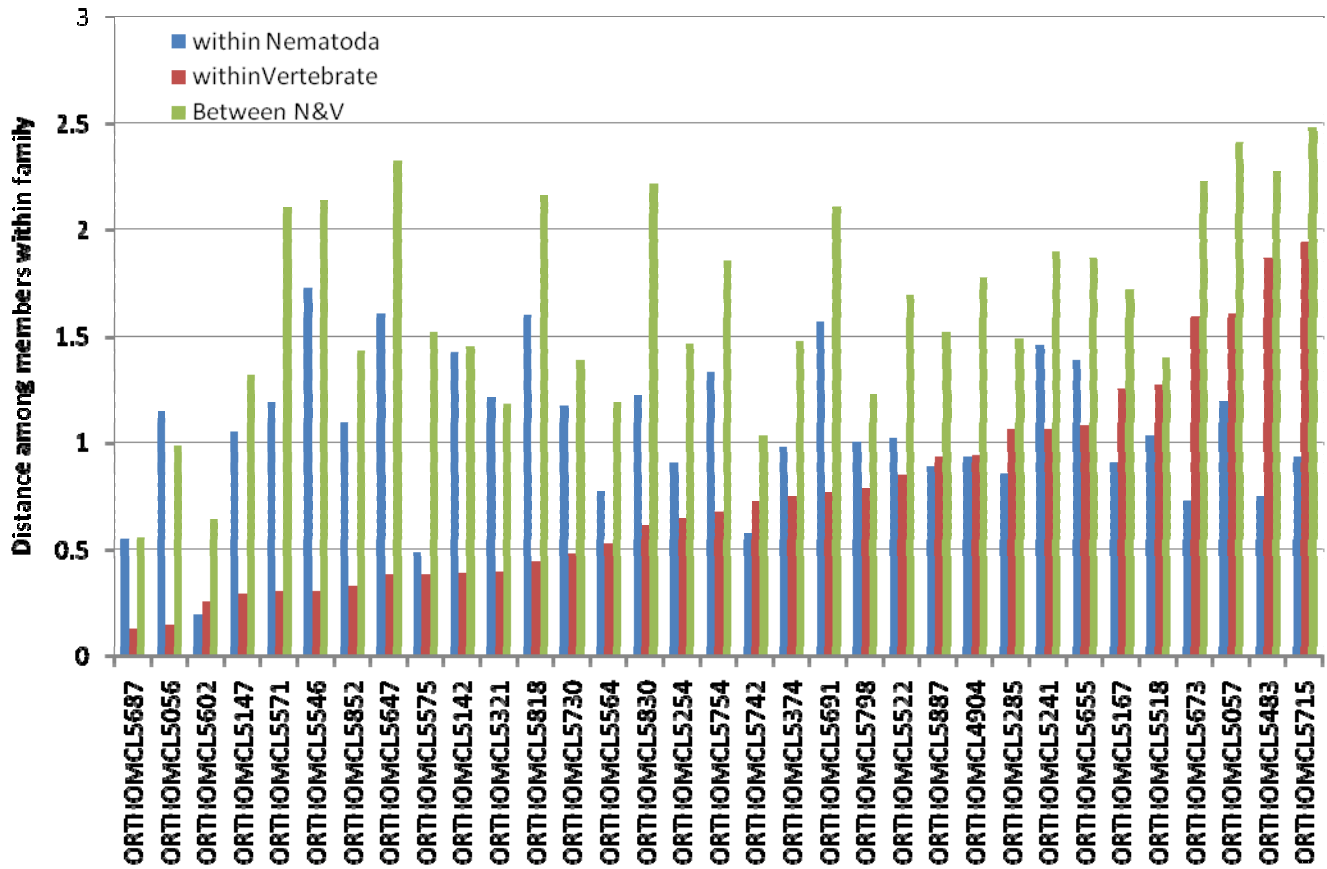

**Supplementary Fig. 8.** The 33 single copy genes and their inter- and intra-phyllum conservation based on distance matrix. The mean distances of each nematode group were compared to that of its corresponding non-nematode group and that of between the members of the two groups (specific example is presented in **Supplementary Fig. 6**).

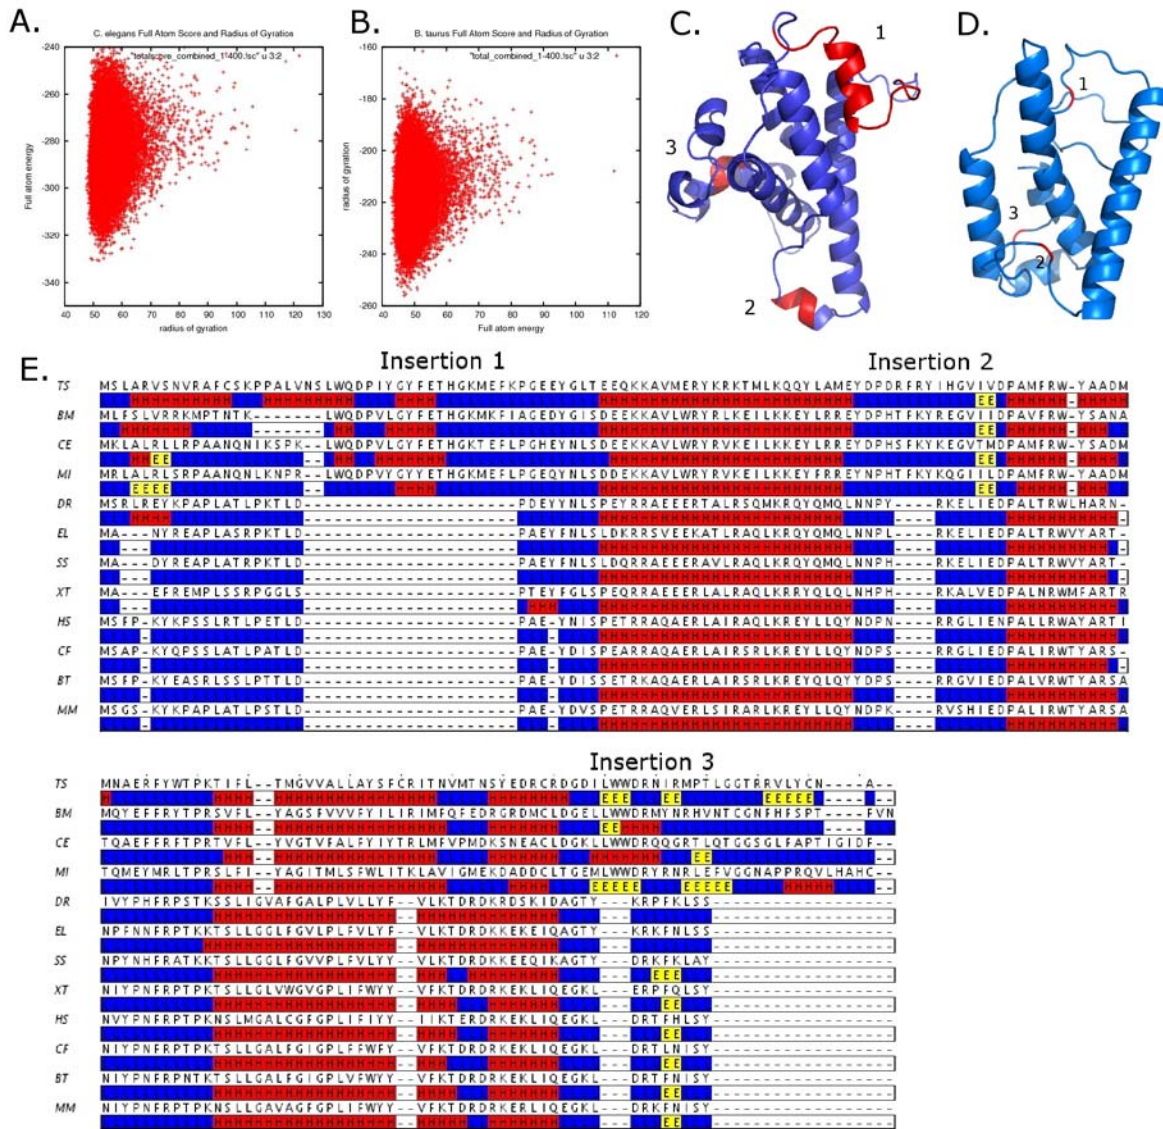

**Supplementary Fig. 9.** Structural annotation and comparison of proteins from ORTHOMCL5157. The Rosetta3.0 software suite generated 40,000 decoys, and the full-atom scores were plotted against the radius of gyration for (A) *C. elegans* and (B) *B. taurus*. The structural prediction for (C) *C. elegans* and (D) *B. taurus*. The insertions in the *C. elegans* protein are numbered starting at the N terminus and are colored in red. The residues flanking the deletions in the *B. taurus* protein are shown in red and also labeled from the N to C terminus. (E) Example of one secondary structure prediction with respect to the sequence alignment for the nematode and non-nematode species. The sequence is shown without coloring and the secondary structure prediction is shown below. Helical regions are colored red and noted by the letter H, beta-sheet regions are colored yellow and noted by the letter E, and loop regions are colored blue and noted by the letter L. The species names are abbreviated as follows: *T. spiralis* (TS), *B. malayi* (BM), *C. elegans* (CE), *M. incognita* (MI), *D. rerio* (DR), *E. lucius* (EL), *S. salar* (SS), *X. tropicalis* (XT), *H. sapiens* (HS), *C. familiaris* (CF), *B. taurus* (BT), *M. musculus* (MM).



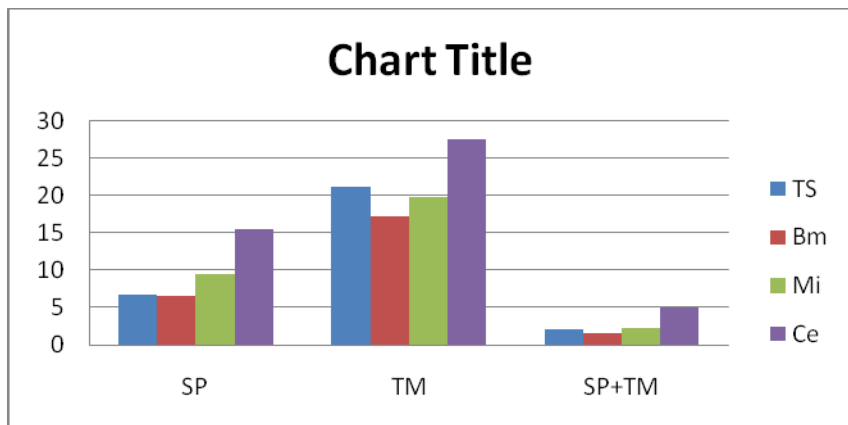

**Supplementary Fig. 11.** Predicted signal peptides for secretions and transmembrane domains in complete proteomes of four nematode species. TS, *T. spiralis*; Bm, *B. malayi*; Mi, *M. incognita*; Ce, *C. elegans*.

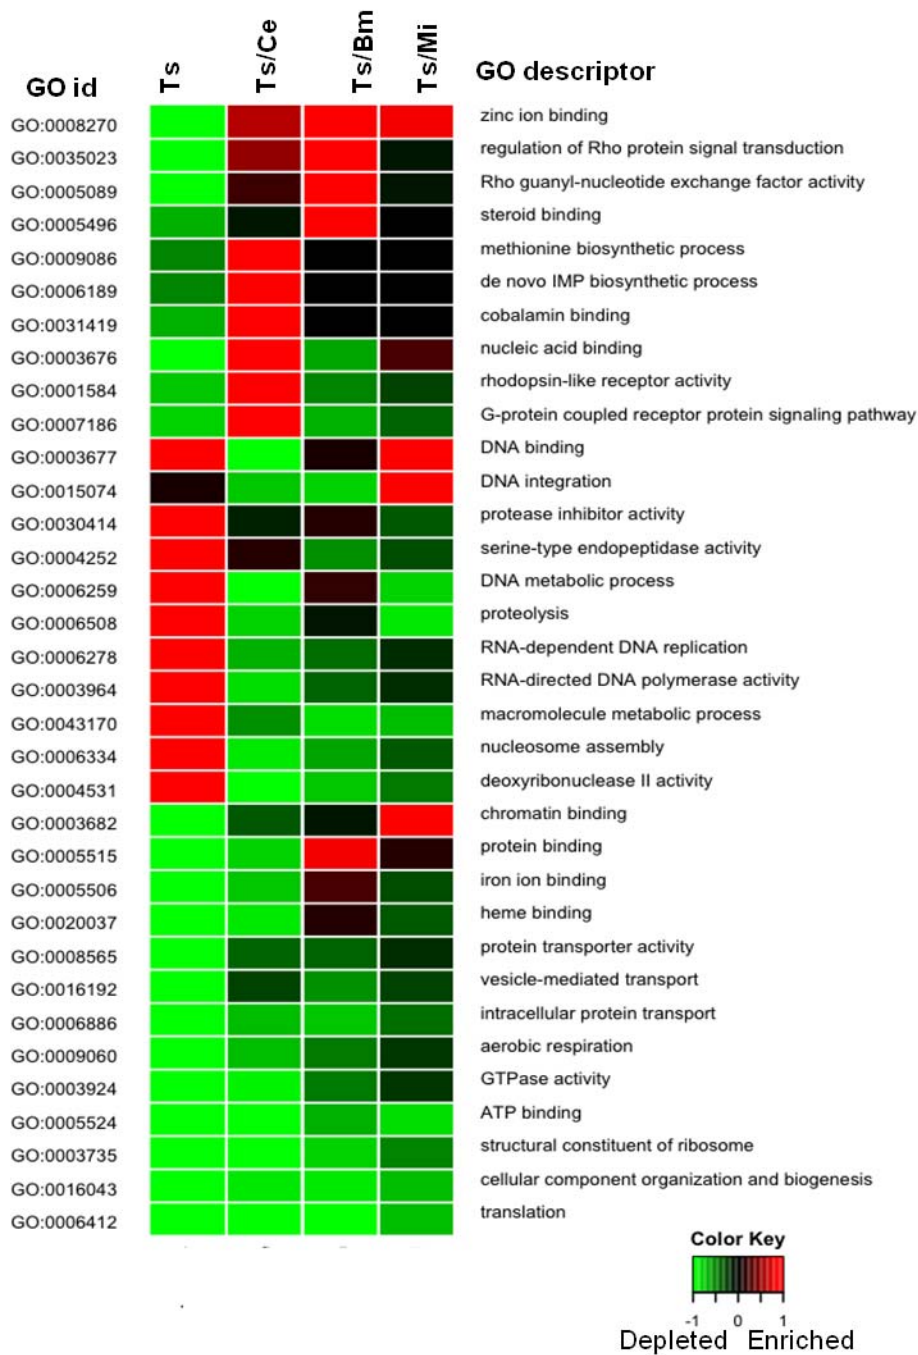

**Supplementary Fig.12.** Enriched and depleted GO categories in orthologous groups with restricted species representation. The heatmap was built based on the GO enrichment and depletion probabilities using R. Specifically, the significance probability values were converted to heatmap temperatures by getting the differences of the two probability values. A significantly enriched term thus had a higher temperature and a significantly depleted term had a lower temperature. The terms that were significantly enriched or depleted in at least one category are displayed.



**A.**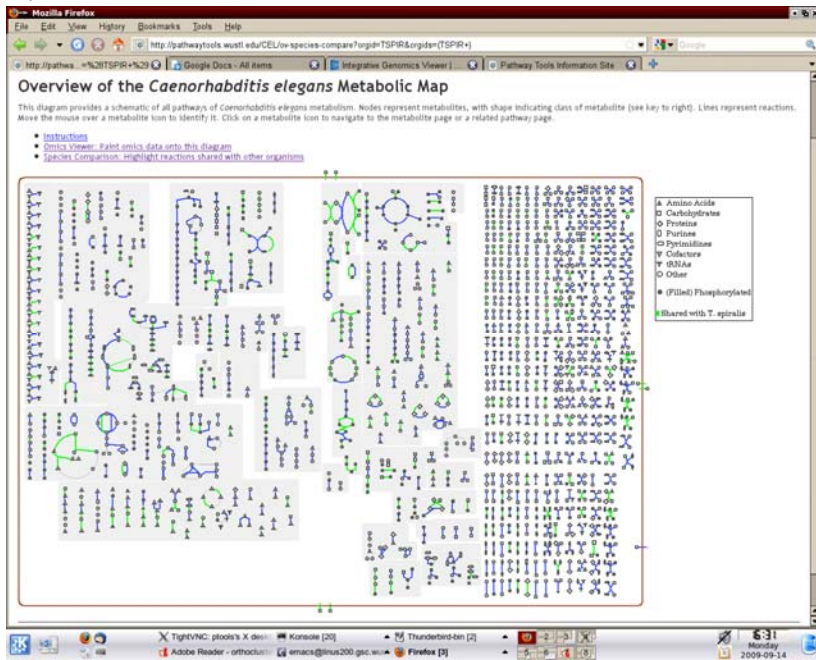**B.**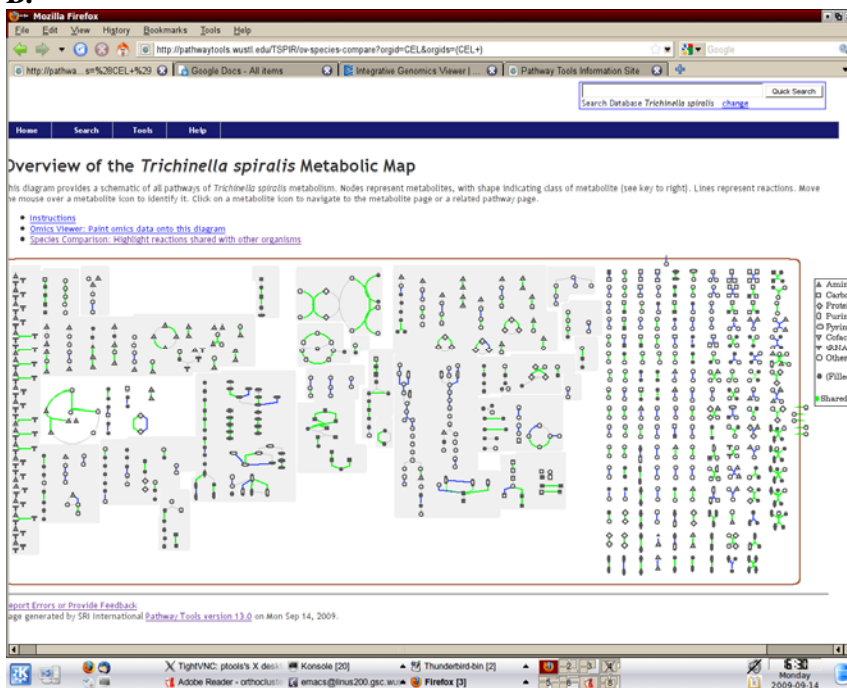

**Supplementary Fig. 14.** Comparison of metabolic profiling of *C. elegans* and *T. spiralis*. **(A)** *T. spiralis* painted onto a *C. elegans* snapshot. **(B)** *C. elegans* painted onto a *T. spiralis* snapshot. Pathway profiling was generated by SRI International Pathway Tools v 13.0. The *C. elegans* pathway map is based on the complete genome and the *T. spiralis* based on the 3576 genome contigs that had genes associated with enzyme (EC) numbers. The reactions common among organisms are marked in blue, and the reactions specific to one organism are marked in green. The online metabolic map is interactive resulting in a vast amount of details that can be retrieved by overlaying the nodes. The NemaCyc viewer is available at <http://pathwaytools.wustl.edu>.

## II – Supplementary Supplementary Tables 1-13

**Supplementary Table 1.** *Trichinella spiralis* genome statistics.

| <b><i>T. spiralis</i> Genome Assembly v3.7.1</b> | <b>Stats</b>    |
|--------------------------------------------------|-----------------|
| Genome size estimated by cytometry (Mb)          | 71.3 +/-<br>1.2 |
| Total number of reads in database passing QC     | 4,359,199       |
| WGS reads in database passing QC                 | 3,982,157       |
| BAC end reads in database passing QC             | 206,713         |
| Fosmid end reads database passing QC             | 170,329         |
| Total number of reads in the assembly            | 3,536,878       |
| WGS reads                                        | 3,347,411       |
| BAC end reads                                    | 40,379          |
| Fosmid end reads                                 | 149,088         |
| Total length in assembly (bp)                    | 59,328,746      |
| Total reads in assembly                          | 3,022,749       |
| Total Q20 bases (bp)                             |                 |
| Q20 coverage (X)                                 | 33              |
| Total number of contigs                          | 11,146          |
| Average length of contigs (bp)                   | 5,323           |
| Max. length of contigs (bp)                      | 482,167         |
| Number of N50 contigs                            | 230             |
| N50 contig length (bp)                           | 76,634          |
| Number of contigs > 2,000 bp                     | 2,229           |
| Total length of contigs > 2,000 bp (bp)          | 50,908,998      |
| Total number of supercontigs                     | 8,795           |
| Average length of supercontigs (bp)              | 6,746           |
| Max. length of supercontigs (bp)                 | 9,739,270       |
| Number of N50 supercontigs                       | 9               |
| N50 supercontig length (bp)                      | 1,738,704       |
| Number of supercontigs > 2,000 bp                | 1,016           |
| Total length of supercontigs > 2,000 bp (bp)     | 52,276,751      |
| Total length of all supercontigs (bp)            | 64,330,920      |
| Total length of non-N/X in supercontigs (bp)     | 59,325,552      |
| Total A                                          | 19,609,992      |
| Total C                                          | 10,072,236      |
| Total G                                          | 10,056,574      |
| Total T                                          | 19,586,750      |
| % A/T                                            | 66%             |
| % G/C                                            | 34%             |
| CDS                                              | 15,808          |
| Total length                                     | 15,700,994      |
| Average CDS length (bp)                          | 993             |
| Median CDS length (bp)                           | 603             |
| StDev                                            | 1,105           |



|                      |           |
|----------------------|-----------|
| Max CDS length (bp)  | 37,260    |
| Min length           | 94        |
| % G/C                | 43.20%    |
| <hr/>                |           |
| Protein coding genes | 15,808    |
| Total length (aa)    | 5,218,886 |
| Average length (aa)  | 330       |
| Median length (aa)   | 200       |
| StDev                | 368       |
| Max length (aa)      | 12,419    |
| Min length           | 32        |
| <hr/>                |           |
| rFAM                 | 394       |
| Total length         | 52,061    |
| Average length (bp)  | 132       |
| Median length (bp)   | 109       |
| StDev                | 143       |
| Max length (bp)      | 611       |
| Min length           | 26        |
| <hr/>                |           |
| tRNA                 | 143       |
| Total length         | 10,832    |
| Average length (bp)  | 76        |
| Median length (bp)   | 73        |
| StDev                | 7         |
| Max length (bp)      | 114       |
| Min length           | 69        |
| <hr/>                |           |

**Supplementary Table 2.** Amino acid composition (%) of complete proteomes of six species.

|   | Amino Acid | <i>C. elegans</i> | <b>B.</b><br><i>malayi</i> | <i>T. spiralis</i> | <i>D. melanogaster</i> | <i>S. cerevisiae</i> |
|---|------------|-------------------|----------------------------|--------------------|------------------------|----------------------|
| F | Phe        | 4.84              | 4.07                       | 4.6                | 3.56                   | 4.51                 |
| S | Ser        | 8.05              | 8.11                       | 8.24               | 8.36                   | 9.05                 |
| T | Thr        | 5.86              | 5.6                        | 5.43               | 5.7                    | 5.89                 |
| N | Asn        | 4.9               | 4.95                       | 4.9                | 4.68                   | 6.1                  |
| K | Lys        | 6.39              | 6.19                       | 5.94               | 5.59                   | 7.28                 |
| E | Glu        | 6.51              | 6.64                       | 6.07               | 6.41                   | 6.46                 |
| Y | Tyr        | 3.21              | 3.16                       | 3.07               | 2.98                   | 3.37                 |
| V | Val        | 6.21              | 6.01                       | 6.5                | 5.9                    | 5.56                 |
| Q | Gln        | 4.07              | 4.18                       | 4.28               | 5.18                   | 3.91                 |
| M | Met        | 2.64              | 2.55                       | 2.41               | 2.34                   | 2.08                 |
| C | Cys        | 2.07              | 2.22                       | 2.76               | 1.91                   | 1.31                 |
| L | Leu        | 8.66              | 9.17                       | 9.48               | 9.15                   | 9.58                 |
| A | Ala        | 6.28              | 6.24                       | 6.52               | 7.33                   | 5.47                 |
| W | Typ        | 1.11              | 1.1                        | 1.22               | 1                      | 1.04                 |
| P | Pro        | 4.85              | 4.42                       | 4.39               | 5.5                    | 4.38                 |
| H | His        | 2.28              | 2.45                       | 2.57               | 2.64                   | 2.17                 |
| D | Asp        | 5.29              | 5.42                       | 5.03               | 5.16                   | 5.78                 |
| I | Ile        | 6.22              | 6.33                       | 5.62               | 4.92                   | 6.56                 |
| R | Arg        | 5.12              | 5.83                       | 5.9                | 5.57                   | 4.45                 |
| G | Gly        | 5.31              | 5.25                       | 4.99               | 6.04                   | 4.94                 |

**Supplementary Table 3.** Orthologous groups generated by Markov Clustering of 6 complete proteomes. This table lists the number of orthologous groups generated by Orthomcl and the number of genes from each species for a particular combination of species. For example (see line 1), there were 21 orthologous groups with genes only from *C. elegans* and *S. cerevisiae* containing 38 and 28 genes, respectively.

| Orthologous groups | Number of genes per group |                     |                  |                    |                        |                      |
|--------------------|---------------------------|---------------------|------------------|--------------------|------------------------|----------------------|
|                    | <i>C. elegans</i>         | <i>M. incognita</i> | <i>B. malayi</i> | <i>T. spiralis</i> | <i>D. melanogaster</i> | <i>S. cerevisiae</i> |
| 21                 | 38                        | 0                   | 0                | 0                  | 0                      | 28                   |
| 1020               | 5964                      | 0                   | 0                | 0                  | 0                      | 0                    |
| 1186               | 1592                      | 2175                | 1451             | 1846               | 1688                   | 1476                 |
| 14                 | 0                         | 0                   | 0                | 17                 | 16                     | 16                   |
| 22                 | 0                         | 38                  | 24               | 0                  | 23                     | 0                    |
| 10                 | 0                         | 88                  | 0                | 0                  | 0                      | 11                   |
| 716                | 0                         | 0                   | 0                | 0                  | 2972                   | 0                    |
| 373                | 0                         | 0                   | 0                | 0                  | 0                      | 1104                 |
| 20                 | 0                         | 120                 | 0                | 0                  | 36                     | 0                    |
| 27                 | 0                         | 50                  | 33               | 30                 | 37                     | 0                    |
| 1407               | 0                         | 6242                | 0                | 0                  | 0                      | 0                    |
| 189                | 222                       | 0                   | 202              | 278                | 0                      | 0                    |
| 54                 | 65                        | 102                 | 0                | 64                 | 74                     | 68                   |
| 1                  | 0                         | 2                   | 1                | 0                  | 0                      | 1                    |
| 4                  | 0                         | 7                   | 4                | 0                  | 27                     | 23                   |
| 23                 | 0                         | 46                  | 24               | 84                 | 0                      | 0                    |
| 11                 | 35                        | 16                  | 12               | 0                  | 0                      | 27                   |
| 629                | 947                       | 0                   | 684              | 0                  | 0                      | 0                    |
| 16                 | 22                        | 29                  | 17               | 22                 | 0                      | 22                   |
| 15                 | 0                         | 50                  | 0                | 43                 | 0                      | 0                    |
| 54                 | 0                         | 0                   | 55               | 65                 | 59                     | 0                    |
| 201                | 228                       | 346                 | 215              | 0                  | 245                    | 234                  |
| 10                 | 15                        | 22                  | 0                | 0                  | 0                      | 16                   |
| 122                | 0                         | 260                 | 141              | 0                  | 0                      | 0                    |
| 50                 | 0                         | 0                   | 60               | 0                  | 64                     | 0                    |
| 14                 | 0                         | 18                  | 16               | 20                 | 14                     | 17                   |
| 36                 | 45                        | 0                   | 0                | 0                  | 51                     | 42                   |
| 7                  | 0                         | 0                   | 7                | 0                  | 19                     | 8                    |
| 2                  | 3                         | 3                   | 0                | 3                  | 0                      | 2                    |
| 343                | 776                       | 1152                | 0                | 0                  | 0                      | 0                    |
| 4                  | 0                         | 7                   | 0                | 4                  | 4                      | 0                    |
| 270                | 336                       | 0                   | 286              | 0                  | 350                    | 0                    |
| 489                | 537                       | 0                   | 528              | 653                | 542                    | 0                    |
| 2                  | 0                         | 0                   | 2                | 2                  | 0                      | 2                    |
| 131                | 0                         | 0                   | 0                | 181                | 181                    | 0                    |
| 80                 | 118                       | 172                 | 0                | 0                  | 107                    | 0                    |
| 27                 | 32                        | 0                   | 0                | 31                 | 33                     | 33                   |
| 88                 | 0                         | 0                   | 0                | 0                  | 164                    | 105                  |
| 89                 | 114                       | 0                   | 0                | 261                | 0                      | 0                    |
| 5                  | 0                         | 0                   | 72               | 0                  | 0                      | 7                    |
| 30                 | 46                        | 43                  | 0                | 0                  | 39                     | 37                   |
| 15                 | 24                        | 0                   | 15               | 0                  | 0                      | 16                   |
| 355                | 478                       | 612                 | 390              | 0                  | 497                    | 0                    |
| 52                 | 0                         | 0                   | 73               | 136                | 0                      | 0                    |
| 11                 | 0                         | 0                   | 19               | 28                 | 14                     | 13                   |

|      |      |      |      |      |      |     |
|------|------|------|------|------|------|-----|
| 308  | 357  | 0    | 329  | 374  | 356  | 350 |
| 60   | 92   | 118  | 0    | 81   | 0    | 0   |
| 97   | 116  | 0    | 0    | 117  | 113  | 0   |
| 271  | 0    | 0    | 822  | 0    | 0    | 0   |
| 274  | 410  | 511  | 507  | 562  | 0    | 0   |
| 974  | 0    | 0    | 0    | 4313 | 0    | 0   |
| 134  | 221  | 0    | 0    | 0    | 219  | 0   |
| 543  | 831  | 1466 | 610  | 0    | 0    | 0   |
| 8    | 14   | 0    | 0    | 9    | 0    | 8   |
| 12   | 12   | 0    | 16   | 18   | 0    | 14  |
| 1    | 0    | 1    | 0    | 0    | 3    | 1   |
| 85   | 91   | 0    | 87   | 0    | 95   | 98  |
| 1041 | 1278 | 1844 | 1213 | 1322 | 1417 | 0   |
| 13   | 0    | 0    | 0    | 48   | 0    | 103 |
| 97   | 141  | 181  | 0    | 108  | 144  | 0   |

---

**Supplementary Table 4.** Annotation of the 702 protein families born at the Nematoda relative to the two outgroups'corrected to 'proteome size'.

| <b>Orthomcl group</b>         | <b>PFAM annotation (#genes with pfam)</b>               |
|-------------------------------|---------------------------------------------------------|
| ORTHOMCL8(142 genes,2 taxa):  | PF02170(37) PF08699(31) PF02171(70)                     |
| ORTHOMCL40(59 genes,4 taxa):  | PF00635(59)                                             |
| ORTHOMCL42(57 genes,3 taxa):  | PF03732(3) PF00078(10) PF00552(1) PF00077(3) PF02022(1) |
| ORTHOMCL66(46 genes,3 taxa):  | PF00665(23) PF00098(2)                                  |
| ORTHOMCL141(28 genes,3 taxa): | PF05225(1) PF09091(4) PF00024(1)                        |
| ORTHOMCL162(25 genes,2 taxa): | PF07801(16)                                             |
| ORTHOMCL180(24 genes,2 taxa): | PF00782(1) PF00097(1) PF04683(1) PF00665(11)            |
| ORTHOMCL195(22 genes,2 taxa): |                                                         |
| ORTHOMCL205(21 genes,2 taxa): |                                                         |
| ORTHOMCL221(20 genes,4 taxa): | PF00026(20) PF07966(3)                                  |
| ORTHOMCL241(19 genes,4 taxa): | PF06828(16)                                             |
| ORTHOMCL247(19 genes,2 taxa): | PF00097(18)                                             |
| ORTHOMCL251(18 genes,2 taxa): |                                                         |
| ORTHOMCL258(18 genes,4 taxa): | PF04870(18)                                             |
| ORTHOMCL275(17 genes,4 taxa): | PF01484(16) PF01391(17)                                 |
| ORTHOMCL353(15 genes,2 taxa): | PF00096(12)                                             |
| ORTHOMCL360(14 genes,4 taxa): | PF00635(13)                                             |
| ORTHOMCL410(13 genes,4 taxa): | PF00069(11) PF00326(3)                                  |
| ORTHOMCL453(13 genes,2 taxa): | PF03564(4)                                              |
| ORTHOMCL481(12 genes,4 taxa): | PF00400(1)                                              |
| ORTHOMCL482(12 genes,3 taxa): |                                                         |
| ORTHOMCL506(12 genes,2 taxa): | PF06542(10)                                             |
| ORTHOMCL548(11 genes,4 taxa): | PF00100(11)                                             |
| ORTHOMCL560(11 genes,4 taxa): | PF00583(4)                                              |
| ORTHOMCL592(11 genes,4 taxa): | PF00038(11) PF00932(11)                                 |
| ORTHOMCL601(11 genes,3 taxa): | PF07690(9) PF04928(1)                                   |
| ORTHOMCL637(10 genes,4 taxa): | PF00397(6)                                              |
| ORTHOMCL639(10 genes,4 taxa): | PF01549(6) PF03098(10)                                  |
| ORTHOMCL724(10 genes,4 taxa): | PF00001(1)                                              |
| ORTHOMCL741(10 genes,4 taxa): | PF04930(1) PF00097(1) PF00643(6)                        |
| ORTHOMCL772(10 genes,3 taxa): | PF05422(1) PF03227(6)                                   |
| ORTHOMCL817(9 genes,4 taxa):  | PF00501(6) PF02274(4)                                   |
| ORTHOMCL827(9 genes,3 taxa):  | PF00642(9)                                              |
| ORTHOMCL840(9 genes,3 taxa):  | PF02995(8)                                              |
| ORTHOMCL886(9 genes,4 taxa):  | PF00014(7)                                              |
| ORTHOMCL896(9 genes,4 taxa):  | PF00328(9)                                              |
| ORTHOMCL930(9 genes,4 taxa):  | PF00751(6)                                              |
| ORTHOMCL934(9 genes,4 taxa):  | PF02931(9) PF01852(3) PF02932(6)                        |
| ORTHOMCL969(9 genes,4 taxa):  | PF01471(2) PF00413(2) PF00041(9)                        |
| ORTHOMCL988(9 genes,2 taxa):  | PF00059(6)                                              |
| ORTHOMCL1012(9 genes,3 taxa): | PF01679(9)                                              |
| ORTHOMCL1016(9 genes,2 taxa): | PF05699(1)                                              |
| ORTHOMCL1035(8 genes,3 taxa): | PF01683(8) PF00014(8)                                   |
| ORTHOMCL1085(8 genes,4 taxa): | PF06119(7) PF03782(8) PF08433(1) PF01531(2)             |
| ORTHOMCL1110(8 genes,4 taxa): | PF00008(7) PF01390(5) PF07645(6) PF00092(6) PF00057(1)  |
| ORTHOMCL1140(8 genes,4 taxa): | PF07974(3)                                              |
| ORTHOMCL1168(8 genes,4 taxa): | PF00876(8)                                              |
| ORTHOMCL1268(8 genes,4 taxa): | PF01060(2) PF03238(1) PF00328(8)                        |
| ORTHOMCL1272(8 genes,3 taxa): | PF01060(8)                                              |
|                               | PF00024(8)                                              |

ORTHOMCL1289(8 genes,4 taxa):  
 ORTHOMCL1295(8 genes,4 taxa): PF00578(7)  
 ORTHOMCL1380(8 genes,3 taxa): PF02958(4) PF07914(4)  
 ORTHOMCL1383(8 genes,3 taxa): PF01105(1) PF00650(3)  
 ORTHOMCL1385(8 genes,2 taxa):  
 ORTHOMCL1433(8 genes,3 taxa): PF07885(8)  
 ORTHOMCL1562(7 genes,2 taxa): PF00642(2)  
 ORTHOMCL1567(7 genes,4 taxa): PF00092(7)  
 ORTHOMCL1596(7 genes,4 taxa): PF00168(5)  
 ORTHOMCL1646(7 genes,4 taxa): PF00646(5)  
 ORTHOMCL1674(7 genes,4 taxa): PF00001(4)  
 ORTHOMCL1692(7 genes,4 taxa): PF00096(6)  
 ORTHOMCL1711(7 genes,3 taxa): PF01607(7)  
 ORTHOMCL1713(7 genes,4 taxa): PF00042(7)  
 ORTHOMCL1808(7 genes,4 taxa): PF00010(7)  
 ORTHOMCL1816(7 genes,4 taxa): PF01166(1) PF03137(7) PF07648(2)  
 ORTHOMCL1820(7 genes,4 taxa): PF00010(5)  
 ORTHOMCL1840(7 genes,4 taxa): PF00743(6) PF07992(1)  
 PF00168(4) PF00387(4) PF00788(4) PF00617(2) PF09279(3)  
 ORTHOMCL1939(7 genes,4 taxa): PF00388(4) PF00023(1)  
 ORTHOMCL1943(7 genes,4 taxa): PF08371(6) PF00614(5)  
 ORTHOMCL2010(7 genes,4 taxa): PF00011(5)  
 ORTHOMCL2040(7 genes,4 taxa): PF01484(7) PF01391(6)  
 ORTHOMCL2141(7 genes,4 taxa): PF04942(3) PF01607(2)  
 ORTHOMCL2167(7 genes,3 taxa): PF00182(7) PF00090(1) PF00024(1)  
 ORTHOMCL2299(6 genes,4 taxa): PF03165(4) PF03166(6)  
 ORTHOMCL2354(6 genes,2 taxa):  
 ORTHOMCL2380(6 genes,4 taxa): PF00621(1)  
 ORTHOMCL2413(6 genes,3 taxa):  
 ORTHOMCL2432(6 genes,4 taxa): PF00640(3)  
 ORTHOMCL2441(6 genes,3 taxa):  
 ORTHOMCL2464(6 genes,4 taxa):  
 ORTHOMCL2496(6 genes,4 taxa): PF00907(6)  
 ORTHOMCL2499(6 genes,4 taxa): PF00076(6)  
 ORTHOMCL2503(6 genes,3 taxa): PF00100(2) PF00024(2)  
 ORTHOMCL2520(6 genes,4 taxa): PF00725(6) PF02737(6)  
 ORTHOMCL2524(6 genes,4 taxa): PF01593(6)  
 ORTHOMCL2553(6 genes,3 taxa): PF06733(5) PF07690(2) PF04851(1)  
 ORTHOMCL2644(6 genes,4 taxa): PF07200(6)  
 ORTHOMCL2669(6 genes,4 taxa): PF05680(6)  
 ORTHOMCL2675(6 genes,4 taxa): PF01545(6)  
 ORTHOMCL2681(6 genes,4 taxa):  
 ORTHOMCL2695(6 genes,4 taxa): PF00610(2)  
 ORTHOMCL2732(6 genes,4 taxa): PF00057(4)  
 ORTHOMCL2753(6 genes,4 taxa): PF00179(6)  
 ORTHOMCL2759(6 genes,4 taxa): PF00112(6)  
 ORTHOMCL2785(6 genes,4 taxa): PF00178(5)  
 ORTHOMCL2787(6 genes,4 taxa): PF07062(6)  
 ORTHOMCL2790(6 genes,4 taxa): PF07714(4) PF00069(1) PF00211(4) PF00201(3)  
 ORTHOMCL2817(6 genes,4 taxa):  
 ORTHOMCL2821(6 genes,4 taxa): PF00631(6)  
 ORTHOMCL2842(6 genes,4 taxa): PF00069(6)  
 ORTHOMCL2860(6 genes,4 taxa): PF02886(6) PF00375(1) PF02144(1) PF01273(3)  
 ORTHOMCL2870(6 genes,4 taxa): PF00373(6) PF00595(6) PF06391(1)  
 ORTHOMCL2901(6 genes,4 taxa): PF00076(6)  
 ORTHOMCL2946(6 genes,4 taxa): PF00022(6)  
 ORTHOMCL2950(6 genes,3 taxa): PF01055(6) PF00088(4)

ORTHOMCL2970(6 genes,4 taxa): PF06003(1)  
 ORTHOMCL2991(6 genes,4 taxa): PF00685(6)  
 ORTHOMCL3006(6 genes,4 taxa): PF00571(6) PF00654(6)  
 ORTHOMCL3028(6 genes,4 taxa): PF04032(1)  
 ORTHOMCL3050(6 genes,4 taxa): PF02524(1) PF01465(3)  
 ORTHOMCL3051(6 genes,4 taxa):  
 ORTHOMCL3053(6 genes,4 taxa): PF00008(5) PF00047(5) PF00095(1) PF07645(1) PF00092(5)  
 ORTHOMCL3069(6 genes,4 taxa): PF07679(2) PF00041(5) PF00014(1) PF00086(1) PF00084(2)  
 ORTHOMCL3091(6 genes,4 taxa): PF03661(2)  
 ORTHOMCL3100(6 genes,4 taxa): PF07002(5)  
 ORTHOMCL3108(6 genes,4 taxa): PF00397(3) PF00640(6) PF01715(1)  
 ORTHOMCL3112(6 genes,4 taxa): PF02191(6) PF01391(6)  
 ORTHOMCL3156(6 genes,3 taxa): PF07092(4)  
 ORTHOMCL3172(6 genes,4 taxa): PF00595(6)  
 ORTHOMCL3185(6 genes,4 taxa): PF00106(4)  
 ORTHOMCL3190(6 genes,4 taxa): PF00270(4) PF00271(5)  
 ORTHOMCL3216(6 genes,4 taxa): PF00036(6)  
 ORTHOMCL3219(6 genes,4 taxa): PF03250(6)  
 ORTHOMCL3286(6 genes,4 taxa): PF01484(6) PF01391(6)  
 ORTHOMCL3360(6 genes,3 taxa):  
 ORTHOMCL3366(6 genes,3 taxa): PF00083(6)  
 ORTHOMCL3515(5 genes,4 taxa): PF02178(4)  
 ORTHOMCL3530(5 genes,4 taxa): PF00047(5) PF07679(5) PF00041(5)  
 ORTHOMCL3539(5 genes,4 taxa): PF00012(5) PF01400(2)  
 ORTHOMCL3540(5 genes,4 taxa): PF00096(5)  
 ORTHOMCL3552(5 genes,4 taxa): PF00858(4)  
 ORTHOMCL3585(5 genes,4 taxa): PF08544(1) PF06415(5) PF01676(5)  
 ORTHOMCL3588(5 genes,4 taxa): PF00250(5)  
 ORTHOMCL3590(5 genes,4 taxa): PF03403(5)  
 ORTHOMCL3599(5 genes,4 taxa): PF00339(4) PF02752(3)  
 ORTHOMCL3612(5 genes,4 taxa): PF00651(4) PF00096(4)  
 ORTHOMCL3624(5 genes,4 taxa): PF01484(4) PF01391(5)  
 ORTHOMCL3656(5 genes,4 taxa):  
 ORTHOMCL3657(5 genes,4 taxa): PF00400(1)  
 ORTHOMCL3658(5 genes,4 taxa): PF06784(1)  
 ORTHOMCL3665(5 genes,4 taxa): PF00047(1)  
 ORTHOMCL3669(5 genes,3 taxa):  
 ORTHOMCL3713(5 genes,4 taxa): PF01556(2) PF00684(5) PF00226(3)  
 ORTHOMCL3718(5 genes,4 taxa): PF00042(1)  
 ORTHOMCL3728(5 genes,4 taxa): PF03131(1) PF07562(3) PF01094(2) PF00003(5)  
 ORTHOMCL3737(5 genes,4 taxa): PF01770(5)  
 ORTHOMCL3740(5 genes,4 taxa):  
 ORTHOMCL3787(5 genes,3 taxa):  
 ORTHOMCL3792(5 genes,3 taxa): PF00566(2)  
 ORTHOMCL3796(5 genes,4 taxa): PF00042(4)  
 ORTHOMCL3799(5 genes,4 taxa):  
 ORTHOMCL3815(5 genes,4 taxa): PF01484(5) PF01391(5) PF02089(1)  
 ORTHOMCL3822(5 genes,4 taxa): PF07714(5) PF00041(1)  
 ORTHOMCL3825(5 genes,4 taxa): PF00400(1)  
 ORTHOMCL3833(5 genes,4 taxa): PF01569(5)  
 ORTHOMCL3859(5 genes,4 taxa): PF00135(5)  
 ORTHOMCL3870(5 genes,4 taxa): PF00168(5) PF02845(3)  
 ORTHOMCL3901(5 genes,3 taxa): PF01477(1) PF00102(2)  
 ORTHOMCL3923(5 genes,4 taxa): PF00682(1) PF02931(4)  
 ORTHOMCL3926(5 genes,4 taxa):  
 ORTHOMCL3934(5 genes,3 taxa): PF08585(4)

ORTHOMCL3943(5 genes,4 taxa): PF02198(4) PF00178(5)  
 ORTHOMCL3958(5 genes,4 taxa):  
 ORTHOMCL3960(5 genes,4 taxa): PF00096(5)  
 ORTHOMCL3978(5 genes,4 taxa): PF00071(5)  
 ORTHOMCL3980(5 genes,4 taxa): PF03999(2)  
 ORTHOMCL4002(5 genes,4 taxa): PF02931(3) PF02932(3)  
 ORTHOMCL4006(5 genes,4 taxa): PF00168(2) PF00648(5) PF01067(2)  
 ORTHOMCL4009(5 genes,4 taxa): PF02460(5)  
 ORTHOMCL4012(5 genes,4 taxa): PF08243(2)  
 ORTHOMCL4016(5 genes,4 taxa): PF00786(3) PF00069(5)  
 ORTHOMCL4018(5 genes,3 taxa): PF00621(2) PF00169(4) PF01363(3)  
 ORTHOMCL4027(5 genes,4 taxa): PF07690(5)  
 ORTHOMCL4028(5 genes,4 taxa): PF00349(5) PF03727(5)  
 ORTHOMCL4036(5 genes,4 taxa): PF01682(5)  
 ORTHOMCL4040(5 genes,4 taxa):  
 ORTHOMCL4043(5 genes,4 taxa):  
 ORTHOMCL4049(5 genes,4 taxa): PF00001(5)  
 ORTHOMCL4050(5 genes,4 taxa): PF07001(4)  
 ORTHOMCL4055(5 genes,3 taxa): PF03121(4)  
 ORTHOMCL4056(5 genes,3 taxa): PF00008(2) PF01683(5)  
 ORTHOMCL4076(5 genes,3 taxa): PF00043(5) PF02798(5)  
 ORTHOMCL4083(5 genes,4 taxa): PF00664(4) PF00005(4)  
 ORTHOMCL4089(5 genes,4 taxa): PF07890(4)  
 ORTHOMCL4095(5 genes,4 taxa): PF00876(5)  
 ORTHOMCL4103(5 genes,4 taxa):  
 ORTHOMCL4114(5 genes,4 taxa): PF00612(2) PF03607(3) PF01477(5)  
 ORTHOMCL4121(5 genes,4 taxa):  
 ORTHOMCL4131(5 genes,4 taxa): PF01146(5)  
 ORTHOMCL4141(5 genes,4 taxa): PF07986(5)  
 ORTHOMCL4142(5 genes,4 taxa): PF00382(1) PF02460(5) PF00400(1) PF08271(1)  
 ORTHOMCL4144(5 genes,3 taxa): PF02807(5) PF00217(5)  
 ORTHOMCL4148(5 genes,4 taxa): PF01392(5)  
 ORTHOMCL4149(5 genes,3 taxa): PF07686(3) PF00047(4) PF07714(5) PF07679(3)  
 ORTHOMCL4150(5 genes,4 taxa): PF00057(5)  
 ORTHOMCL4151(5 genes,4 taxa):  
 ORTHOMCL4155(5 genes,4 taxa): PF00001(5)  
 ORTHOMCL4160(5 genes,4 taxa):  
 ORTHOMCL4162(5 genes,4 taxa):  
 ORTHOMCL4164(5 genes,4 taxa):  
 ORTHOMCL4165(5 genes,4 taxa):  
 ORTHOMCL4179(5 genes,4 taxa): PF00096(3)  
 ORTHOMCL4181(5 genes,4 taxa):  
 ORTHOMCL4185(5 genes,4 taxa): PF01060(5)  
 ORTHOMCL4201(5 genes,3 taxa): PF01423(5)  
 ORTHOMCL4205(5 genes,4 taxa):  
 ORTHOMCL4219(5 genes,4 taxa): PF00001(5)  
 ORTHOMCL4225(5 genes,4 taxa): PF00046(1)  
 ORTHOMCL4232(5 genes,4 taxa): PF00431(5) PF00090(2) PF01400(5)  
 ORTHOMCL4242(5 genes,4 taxa): PF01234(5)  
 ORTHOMCL4252(5 genes,4 taxa): PF00620(5)  
 ORTHOMCL4260(5 genes,4 taxa): PF08768(5) PF01549(3)  
 ORTHOMCL4261(5 genes,4 taxa): PF08768(1)  
 ORTHOMCL4283(5 genes,4 taxa): PF07679(5)  
 ORTHOMCL4287(5 genes,4 taxa): PF00400(4)  
 ORTHOMCL4288(5 genes,4 taxa):  
 ORTHOMCL4310(5 genes,4 taxa): PF00642(5)  
 ORTHOMCL4323(5 genes,4 taxa): PF01705(4)



ORTHOMCL4327(5 genes,4 taxa):  
 ORTHOMCL4337(5 genes,4 taxa): PF04142(5)  
 ORTHOMCL4347(5 genes,4 taxa): PF01581(5)  
 ORTHOMCL4349(5 genes,4 taxa):  
 ORTHOMCL4361(5 genes,4 taxa): PF00135(5)  
 ORTHOMCL4365(5 genes,3 taxa): PF02931(4) PF02932(3)  
 ORTHOMCL4373(5 genes,4 taxa): PF08136(1)  
 ORTHOMCL4375(5 genes,4 taxa): PF00226(5)  
 ORTHOMCL4379(5 genes,4 taxa): PF07645(4) PF06119(5)  
 ORTHOMCL4406(5 genes,4 taxa):  
 ORTHOMCL4416(5 genes,4 taxa): PF07173(5)  
 ORTHOMCL4417(5 genes,4 taxa): PF00402(5)  
 ORTHOMCL4419(5 genes,4 taxa): PF00096(5)  
 ORTHOMCL4423(5 genes,2 taxa):  
 ORTHOMCL4427(5 genes,4 taxa): PF00085(5) PF00226(5)  
 ORTHOMCL4441(5 genes,4 taxa): PF01650(5)  
 ORTHOMCL4443(5 genes,4 taxa):  
 ORTHOMCL4451(5 genes,4 taxa):  
 ORTHOMCL4459(5 genes,4 taxa): PF07885(5)  
 ORTHOMCL4493(5 genes,4 taxa):  
 ORTHOMCL4496(5 genes,3 taxa): PF00069(3) PF07679(5) PF00041(5)  
 ORTHOMCL4512(5 genes,4 taxa): PF00069(5)  
 ORTHOMCL4525(5 genes,4 taxa): PF00036(5)  
 ORTHOMCL4545(5 genes,3 taxa): PF00031(4)  
 ORTHOMCL4560(5 genes,4 taxa): PF00076(5)  
 ORTHOMCL4608(5 genes,3 taxa):  
 ORTHOMCL4622(5 genes,3 taxa): PF00076(4)  
 ORTHOMCL4623(5 genes,3 taxa): PF02931(5) PF02932(5)  
 ORTHOMCL4641(5 genes,3 taxa): PF00036(4)  
 ORTHOMCL4654(5 genes,3 taxa): PF00307(5)  
 ORTHOMCL4663(5 genes,2 taxa):  
 ORTHOMCL4744(5 genes,3 taxa): PF00024(5)  
 ORTHOMCL4776(5 genes,3 taxa):  
 ORTHOMCL4787(5 genes,3 taxa):  
 ORTHOMCL4813(5 genes,3 taxa): PF00564(5)  
 ORTHOMCL4884(4 genes,3 taxa): PF07446(2)  
 ORTHOMCL4887(4 genes,4 taxa): PF01682(4) PF00041(3)  
 ORTHOMCL4901(4 genes,3 taxa):  
 ORTHOMCL4904(4 genes,4 taxa): PF06472(3) PF00005(2)  
 ORTHOMCL4940(4 genes,3 taxa):  
 ORTHOMCL4952(4 genes,3 taxa):  
 ORTHOMCL4953(4 genes,4 taxa):  
 ORTHOMCL4963(4 genes,4 taxa): PF09091(1)  
 ORTHOMCL4964(4 genes,3 taxa): PF00046(3)  
 ORTHOMCL4982(4 genes,4 taxa): PF08768(4)  
 ORTHOMCL4994(4 genes,3 taxa): PF00995(4)  
 ORTHOMCL4999(4 genes,3 taxa): PF07493(2)  
 ORTHOMCL5007(4 genes,4 taxa): PF00339(1) PF05404(1) PF02752(1)  
 ORTHOMCL5011(4 genes,4 taxa): PF00096(4)  
 ORTHOMCL5013(4 genes,4 taxa): PF00264(3) PF01549(3) PF00024(1)  
 ORTHOMCL5014(4 genes,3 taxa): PF00057(2)  
 ORTHOMCL5021(4 genes,3 taxa):  
 ORTHOMCL5033(4 genes,3 taxa): PF01734(4)  
 ORTHOMCL5034(4 genes,3 taxa): PF02275(3)  
 ORTHOMCL5044(4 genes,4 taxa):  
 ORTHOMCL5045(4 genes,4 taxa):  
 ORTHOMCL5056(4 genes,4 taxa): PF00110(4)

ORTHOMCL5057(4 genes,4 taxa): PF02460(4)  
 ORTHOMCL5058(4 genes,4 taxa): PF01485(4) PF00097(2)  
 ORTHOMCL5067(4 genes,4 taxa):  
 ORTHOMCL5084(4 genes,4 taxa):  
 ORTHOMCL5103(4 genes,3 taxa):  
 ORTHOMCL5111(4 genes,4 taxa): PF07690(4)  
 ORTHOMCL5114(4 genes,3 taxa):  
 ORTHOMCL5142(4 genes,4 taxa): PF02809(3) PF02099(4)  
 ORTHOMCL5147(4 genes,4 taxa): PF04667(4)  
 ORTHOMCL5148(4 genes,4 taxa):  
 ORTHOMCL5154(4 genes,3 taxa):  
 ORTHOMCL5155(4 genes,4 taxa): PF05071(3)  
 ORTHOMCL5157(4 genes,4 taxa): PF07225(3)  
 ORTHOMCL5160(4 genes,4 taxa): PF07572(4)  
 ORTHOMCL5167(4 genes,4 taxa): PF03137(4)  
 ORTHOMCL5181(4 genes,3 taxa): PF07974(4)  
 ORTHOMCL5182(4 genes,3 taxa):  
 ORTHOMCL5211(4 genes,4 taxa):  
 ORTHOMCL5212(4 genes,3 taxa):  
 ORTHOMCL5213(4 genes,4 taxa): PF01551(2)  
 ORTHOMCL5241(4 genes,4 taxa): PF01471(1) PF00413(4)  
 ORTHOMCL5254(4 genes,4 taxa): PF00233(4)  
 ORTHOMCL5261(4 genes,4 taxa):  
 ORTHOMCL5275(4 genes,4 taxa):  
 ORTHOMCL5285(4 genes,4 taxa): PF00069(3) PF00130(4)  
 ORTHOMCL5303(4 genes,3 taxa): PF02560(4)  
 ORTHOMCL5321(4 genes,4 taxa): PF01187(4)  
 ORTHOMCL5330(4 genes,4 taxa): PF00621(3) PF00169(4)  
 ORTHOMCL5354(4 genes,2 taxa): PF05572(3) PF00084(1)  
 ORTHOMCL5361(4 genes,3 taxa): PF00373(2)  
 ORTHOMCL5367(4 genes,4 taxa): PF00096(1)  
 ORTHOMCL5374(4 genes,4 taxa): PF00168(4) PF00387(4) PF09279(4) PF00036(2) PF00388(4)  
 ORTHOMCL5375(4 genes,3 taxa): PF00097(1)  
 ORTHOMCL5387(4 genes,3 taxa): PF03137(4)  
 ORTHOMCL5396(4 genes,4 taxa): PF02886(3) PF00036(1)  
 ORTHOMCL5406(4 genes,3 taxa): PF00100(4)  
 ORTHOMCL5414(4 genes,4 taxa): PF00876(4)  
 ORTHOMCL5415(4 genes,3 taxa): PF01344(3) PF00651(2)  
 ORTHOMCL5417(4 genes,4 taxa):  
 ORTHOMCL5418(4 genes,4 taxa):  
 ORTHOMCL5436(4 genes,4 taxa): PF01465(3)  
 ORTHOMCL5443(4 genes,4 taxa): PF07562(4) PF01094(4) PF00003(3)  
 ORTHOMCL5445(4 genes,3 taxa): PF03297(1) PF07970(4)  
 ORTHOMCL5450(4 genes,3 taxa): PF00431(4) PF00059(2)  
 ORTHOMCL5453(4 genes,4 taxa):  
 ORTHOMCL5475(4 genes,4 taxa): PF00100(4) PF00024(4)  
 ORTHOMCL5483(4 genes,4 taxa): PF00560(4)  
 ORTHOMCL5484(4 genes,4 taxa): PF03372(3)  
 ORTHOMCL5489(4 genes,4 taxa):  
 ORTHOMCL5506(4 genes,3 taxa): PF00812(4)  
 ORTHOMCL5515(4 genes,3 taxa): PF00595(3) PF00412(1)  
 ORTHOMCL5518(4 genes,4 taxa): PF05154(1) PF00817(4)  
 ORTHOMCL5522(4 genes,4 taxa): PF01151(4)  
 ORTHOMCL5527(4 genes,4 taxa):  
 ORTHOMCL5528(4 genes,4 taxa):  
 ORTHOMCL5540(4 genes,4 taxa): PF00023(3)  
 ORTHOMCL5546(4 genes,4 taxa): PF00335(4)

ORTHOMCL5550(4 genes,3 taxa): PF00858(4)  
 ORTHOMCL5551(4 genes,3 taxa): PF02931(4) PF02932(4)  
 ORTHOMCL5564(4 genes,4 taxa): PF02149(1) PF00069(4)  
 ORTHOMCL5571(4 genes,4 taxa): PF00335(4)  
 ORTHOMCL5575(4 genes,4 taxa): PF01216(4)  
 ORTHOMCL5578(4 genes,3 taxa): PF00085(2)  
 ORTHOMCL5585(4 genes,4 taxa): PF00400(4)  
 ORTHOMCL5586(4 genes,4 taxa): PF01079(4)  
 ORTHOMCL5591(4 genes,3 taxa): PF07885(4)  
 ORTHOMCL5595(4 genes,4 taxa): PF00621(4) PF00169(3)  
 ORTHOMCL5602(4 genes,4 taxa): PF00503(4)  
 ORTHOMCL5632(4 genes,4 taxa): PF04592(1)  
 ORTHOMCL5647(4 genes,4 taxa): PF04622(4)  
 ORTHOMCL5652(4 genes,4 taxa): PF00036(1)  
 ORTHOMCL5653(4 genes,3 taxa): PF02931(4) PF02932(4)  
 ORTHOMCL5655(4 genes,4 taxa): PF00852(4)  
 ORTHOMCL5673(4 genes,4 taxa): PF07885(4)  
 ORTHOMCL5681(4 genes,3 taxa):  
 ORTHOMCL5687(4 genes,4 taxa): PF03165(4) PF03166(4)  
 ORTHOMCL5689(4 genes,4 taxa): PF02008(4)  
 ORTHOMCL5691(4 genes,4 taxa): PF03372(4)  
 ORTHOMCL5707(4 genes,4 taxa): PF00097(4)  
 ORTHOMCL5713(4 genes,3 taxa):  
 ORTHOMCL5715(4 genes,4 taxa): PF01484(1) PF01391(4)  
 ORTHOMCL5730(4 genes,4 taxa): PF00071(4)  
 ORTHOMCL5737(4 genes,4 taxa):  
 ORTHOMCL5742(4 genes,4 taxa): PF02931(4) PF02932(4)  
 ORTHOMCL5754(4 genes,4 taxa): PF07653(1) PF00018(1) PF00625(4)  
 ORTHOMCL5769(4 genes,4 taxa): PF00042(4)  
 ORTHOMCL5772(4 genes,4 taxa):  
 ORTHOMCL5777(4 genes,3 taxa):  
 ORTHOMCL5787(4 genes,3 taxa):  
 ORTHOMCL5798(4 genes,4 taxa): PF01344(4) PF00651(4) PF07707(4)  
 ORTHOMCL5803(4 genes,4 taxa): PF07716(4)  
 ORTHOMCL5805(4 genes,4 taxa): PF01448(3) PF00249(4) PF00096(4)  
 ORTHOMCL5811(4 genes,3 taxa): PF03045(4)  
 ORTHOMCL5813(4 genes,3 taxa):  
 ORTHOMCL5818(4 genes,4 taxa): PF03909(3)  
 ORTHOMCL5819(4 genes,3 taxa): PF00023(3) PF03399(1)  
 ORTHOMCL5830(4 genes,4 taxa): PF00335(4)  
 ORTHOMCL5837(4 genes,4 taxa):  
 ORTHOMCL5840(4 genes,4 taxa):  
 ORTHOMCL5845(4 genes,3 taxa):  
 ORTHOMCL5852(4 genes,4 taxa): PF01553(3)  
 ORTHOMCL5864(4 genes,4 taxa): PF00096(4)  
 ORTHOMCL5871(4 genes,2 taxa): PF01484(4) PF01391(4)  
 ORTHOMCL5886(4 genes,4 taxa): PF00096(4)  
 ORTHOMCL5887(4 genes,4 taxa): PF02145(4)  
 ORTHOMCL5890(4 genes,2 taxa):  
 ORTHOMCL5900(4 genes,3 taxa):  
 ORTHOMCL5906(4 genes,3 taxa): PF00106(1)  
 ORTHOMCL5924(4 genes,3 taxa):  
 ORTHOMCL5928(4 genes,3 taxa):  
 ORTHOMCL5939(4 genes,3 taxa): PF00024(4)  
 ORTHOMCL5982(4 genes,2 taxa): PF00629(2)  
 ORTHOMCL5983(4 genes,3 taxa):  
 ORTHOMCL5985(4 genes,3 taxa):

ORTHOMCL6003(4 genes,3 taxa): PF03372(3)  
 ORTHOMCL6019(4 genes,3 taxa): PF00096(4)  
 ORTHOMCL6031(4 genes,3 taxa): PF00003(4)  
 ORTHOMCL6053(4 genes,3 taxa):  
 ORTHOMCL6054(4 genes,3 taxa):  
 ORTHOMCL6208(4 genes,3 taxa): PF00036(4)  
 ORTHOMCL6209(4 genes,2 taxa): PF00001(2)  
 ORTHOMCL6218(4 genes,3 taxa):  
 ORTHOMCL6224(4 genes,3 taxa): PF00069(4)  
 ORTHOMCL6236(4 genes,3 taxa): PF01465(1)  
 ORTHOMCL6246(4 genes,3 taxa): PF00100(4)  
 ORTHOMCL6268(4 genes,3 taxa):  
 ORTHOMCL6278(4 genes,2 taxa): PF07528(3)  
 ORTHOMCL6307(4 genes,3 taxa): PF00001(2)  
 ORTHOMCL6310(4 genes,3 taxa): PF00583(3)  
 ORTHOMCL6311(4 genes,2 taxa): PF00385(3)  
 ORTHOMCL6323(4 genes,3 taxa): PF01683(4)  
 ORTHOMCL6339(4 genes,3 taxa): PF00396(4)  
 ORTHOMCL6373(4 genes,2 taxa): PF01826(4)  
 ORTHOMCL6456(3 genes,3 taxa): PF00326(3)  
 ORTHOMCL6460(3 genes,3 taxa): PF06682(3)  
 ORTHOMCL6468(3 genes,3 taxa): PF00042(3)  
 ORTHOMCL6471(3 genes,3 taxa): PF02822(3) PF00093(3)  
 ORTHOMCL6472(3 genes,3 taxa): PF03160(3) PF01699(3)  
 ORTHOMCL6476(3 genes,3 taxa): PF01145(3)  
 ORTHOMCL6477(3 genes,3 taxa): PF00431(1) PF00059(3) PF00057(1)  
 ORTHOMCL6483(3 genes,2 taxa): PF08953(1) PF08954(3) PF00400(3)  
 ORTHOMCL6488(3 genes,2 taxa):  
 ORTHOMCL6500(3 genes,3 taxa): PF04906(2)  
 ORTHOMCL6503(3 genes,3 taxa):  
 ORTHOMCL6511(3 genes,2 taxa):  
  
 ORTHOMCL6530(3 genes,3 taxa): PF07743(1) PF00010(1) PF00431(3) PF00090(2) PF01400(3)  
 ORTHOMCL6532(3 genes,3 taxa): PF00226(1)  
 ORTHOMCL6533(3 genes,3 taxa): PF07676(3)  
 ORTHOMCL6533(3 genes,3 taxa): PF00001(3)  
 ORTHOMCL6535(3 genes,3 taxa): PF01683(3)  
 ORTHOMCL6545(3 genes,3 taxa): PF00849(2)  
 ORTHOMCL6547(3 genes,3 taxa): PF07645(1)  
 ORTHOMCL6552(3 genes,3 taxa):  
 ORTHOMCL6563(3 genes,3 taxa): PF02985(3) PF08179(1)  
 ORTHOMCL6566(3 genes,3 taxa): PF00008(1) PF07645(3) PF06119(3) PF09329(1)  
 ORTHOMCL6568(3 genes,3 taxa): PF02194(3) PF00787(3) PF08628(2)  
 ORTHOMCL6569(3 genes,2 taxa):  
 ORTHOMCL6575(3 genes,3 taxa):  
 ORTHOMCL6587(3 genes,3 taxa): PF01484(2) PF01391(3)  
 ORTHOMCL6588(3 genes,3 taxa): PF01145(3)  
 ORTHOMCL6590(3 genes,3 taxa):  
 ORTHOMCL6595(3 genes,2 taxa): PF01549(3)  
 ORTHOMCL6596(3 genes,3 taxa): PF00097(3)  
 ORTHOMCL6600(3 genes,3 taxa): PF08774(2)  
 ORTHOMCL6601(3 genes,3 taxa): PF07690(2)  
 ORTHOMCL6603(3 genes,3 taxa): PF00271(3) PF07810(1) PF00025(1) PF00176(3)  
 ORTHOMCL6604(3 genes,2 taxa):  
 ORTHOMCL6613(3 genes,3 taxa): PF01607(2) PF01683(3)  
 ORTHOMCL6648(3 genes,3 taxa): PF00617(3) PF00618(1) PF00036(2) PF00130(1)  
 ORTHOMCL6654(3 genes,3 taxa): PF00168(3)  
 ORTHOMCL6664(3 genes,3 taxa):

ORTHOMCL6669(3 genes,3 taxa):  
 ORTHOMCL6676(3 genes,3 taxa):  
 ORTHOMCL6679(3 genes,3 taxa): PF00188(3)  
 ORTHOMCL6682(3 genes,3 taxa): PF00412(2)  
 ORTHOMCL6687(3 genes,3 taxa):  
 ORTHOMCL6695(3 genes,3 taxa): PF00156(3)  
 ORTHOMCL6699(3 genes,3 taxa): PF08477(3)  
 ORTHOMCL6702(3 genes,3 taxa): PF02793(1) PF01825(3) PF00002(3) PF02140(2)  
 ORTHOMCL6703(3 genes,3 taxa): PF02234(1)  
 ORTHOMCL6727(3 genes,3 taxa): PF00100(3)  
 ORTHOMCL6731(3 genes,3 taxa): PF07719(1) PF00515(3)  
 ORTHOMCL6733(3 genes,3 taxa):  
 ORTHOMCL6743(3 genes,3 taxa): PF00096(3)  
 ORTHOMCL6744(3 genes,3 taxa):  
 ORTHOMCL6746(3 genes,3 taxa): PF00249(1) PF07679(1)  
 ORTHOMCL6769(3 genes,3 taxa): PF00531(3) PF00069(3) PF00023(3)  
 ORTHOMCL6774(3 genes,3 taxa): PF00169(1)  
 ORTHOMCL6786(3 genes,3 taxa): PF00001(1) PF01748(1)  
 ORTHOMCL6788(3 genes,3 taxa): PF05183(3)  
 ORTHOMCL6794(3 genes,3 taxa): PF04258(3)  
 ORTHOMCL6812(3 genes,2 taxa): PF00373(3) PF08736(2)  
 ORTHOMCL6816(3 genes,3 taxa): PF00209(3)  
 ORTHOMCL6826(3 genes,3 taxa): PF00076(2)  
 ORTHOMCL6834(3 genes,3 taxa): PF00019(3)  
 ORTHOMCL6841(3 genes,3 taxa): PF01161(3)  
 ORTHOMCL6846(3 genes,3 taxa): PF00531(3) PF00023(2)  
 ORTHOMCL6850(3 genes,3 taxa):  
 ORTHOMCL6858(3 genes,3 taxa): PF00271(3) PF04408(3) PF07717(3)  
 ORTHOMCL6864(3 genes,3 taxa): PF03083(1)  
 ORTHOMCL6867(3 genes,2 taxa):  
 ORTHOMCL6873(3 genes,3 taxa): PF00135(3)  
 ORTHOMCL6877(3 genes,3 taxa): PF07885(3)  
 ORTHOMCL6882(3 genes,3 taxa):  
 ORTHOMCL6885(3 genes,3 taxa): PF02931(3) PF02932(3)  
 ORTHOMCL6894(3 genes,2 taxa):  
 ORTHOMCL6902(3 genes,3 taxa): PF08238(1) PF02816(3)  
 ORTHOMCL6905(3 genes,3 taxa): PF00024(3)  
 ORTHOMCL6906(3 genes,3 taxa): PF07690(2)  
 ORTHOMCL6907(3 genes,3 taxa): PF00782(3)  
 ORTHOMCL6910(3 genes,3 taxa): PF00008(3) PF08768(3) PF01549(3)  
 ORTHOMCL6912(3 genes,3 taxa): PF01757(1)  
 ORTHOMCL6914(3 genes,3 taxa): PF07347(2)  
 ORTHOMCL6917(3 genes,3 taxa): PF00147(2) PF00057(1)  
 ORTHOMCL6920(3 genes,3 taxa):  
 ORTHOMCL6921(3 genes,3 taxa): PF00254(3) PF00036(2)  
 ORTHOMCL6933(3 genes,3 taxa):  
 ORTHOMCL6936(3 genes,3 taxa): PF07690(3)  
 ORTHOMCL6940(3 genes,2 taxa):  
 ORTHOMCL6942(3 genes,3 taxa):  
 ORTHOMCL6952(3 genes,3 taxa): PF01607(2)  
 ORTHOMCL6954(3 genes,3 taxa):  
 ORTHOMCL6955(3 genes,3 taxa):  
 ORTHOMCL6971(3 genes,3 taxa):  
 ORTHOMCL6973(3 genes,3 taxa): PF00046(3)  
 ORTHOMCL6978(3 genes,2 taxa): PF01462(3) PF00560(3)  
 ORTHOMCL6983(3 genes,3 taxa): PF00167(3)  
 ORTHOMCL6985(3 genes,3 taxa): PF00071(3)

ORTHOMCL6987(3 genes,3 taxa): PF00620(3) PF00611(2)  
 ORTHOMCL6997(3 genes,3 taxa): PF06762(3)  
 ORTHOMCL7000(3 genes,3 taxa): PF07679(3)  
 ORTHOMCL7002(3 genes,3 taxa): PF00001(3)  
 ORTHOMCL7003(3 genes,3 taxa):  
 ORTHOMCL7010(3 genes,3 taxa): PF00100(3)  
 ORTHOMCL7011(3 genes,3 taxa): PF00876(3)  
 ORTHOMCL7012(3 genes,3 taxa): PF01683(3)  
 ORTHOMCL7014(3 genes,3 taxa): PF00412(1)  
 ORTHOMCL7020(3 genes,3 taxa): PF00010(3)  
 ORTHOMCL7030(3 genes,3 taxa): PF00431(3) PF00057(1)  
 ORTHOMCL7037(3 genes,3 taxa):  
 ORTHOMCL7047(3 genes,3 taxa): PF00326(3)  
 ORTHOMCL7049(3 genes,3 taxa):  
 ORTHOMCL7050(3 genes,3 taxa): PF00753(2)  
 ORTHOMCL7055(3 genes,3 taxa): PF02931(1)  
 ORTHOMCL7061(3 genes,3 taxa): PF00656(3)  
 ORTHOMCL7062(3 genes,3 taxa): PF06671(1) PF00024(3)  
 ORTHOMCL7064(3 genes,3 taxa): PF01585(3)  
 ORTHOMCL7069(3 genes,3 taxa):  
 ORTHOMCL7072(3 genes,3 taxa):  
 ORTHOMCL7073(3 genes,3 taxa): PF02931(3) PF02932(3)  
 ORTHOMCL7074(3 genes,3 taxa):  
 ORTHOMCL7078(3 genes,3 taxa):  
 ORTHOMCL7081(3 genes,3 taxa): PF00651(1)  
 ORTHOMCL7084(3 genes,3 taxa): PF00008(3) PF00100(3) PF07645(3) PF09120(1)  
 ORTHOMCL7085(3 genes,3 taxa): PF02597(3)  
 ORTHOMCL7087(3 genes,3 taxa): PF00085(3)  
 ORTHOMCL7105(3 genes,3 taxa): PF00100(3) PF00092(3)  
 ORTHOMCL7116(3 genes,3 taxa): PF00476(3)  
 ORTHOMCL7118(3 genes,3 taxa):  
 ORTHOMCL7125(3 genes,3 taxa): PF01392(2) PF01534(3)  
 ORTHOMCL7141(3 genes,3 taxa):  
 ORTHOMCL7142(3 genes,3 taxa): PF00071(3)  
 ORTHOMCL7151(3 genes,3 taxa): PF00515(1)  
 ORTHOMCL7153(3 genes,3 taxa): PF00560(3) PF01463(1)  
 ORTHOMCL7156(3 genes,3 taxa): PF00046(3)  
 ORTHOMCL7158(3 genes,3 taxa): PF00168(3)  
 ORTHOMCL7163(3 genes,3 taxa):  
 ORTHOMCL7171(3 genes,3 taxa):  
 ORTHOMCL7173(3 genes,3 taxa):  
 ORTHOMCL7174(3 genes,3 taxa):  
 ORTHOMCL7176(3 genes,3 taxa): PF01062(3)  
 ORTHOMCL7178(3 genes,3 taxa): PF04893(3)  
 ORTHOMCL7186(3 genes,3 taxa): PF06579(3)  
 ORTHOMCL7191(3 genes,3 taxa):  
 ORTHOMCL7197(3 genes,3 taxa):  
 ORTHOMCL7198(3 genes,3 taxa):  
 ORTHOMCL7199(3 genes,3 taxa): PF08560(3)  
 ORTHOMCL7200(3 genes,3 taxa):  
 ORTHOMCL7205(3 genes,3 taxa):  
 ORTHOMCL7208(3 genes,3 taxa): PF00090(3) PF00024(3)  
 ORTHOMCL7215(3 genes,3 taxa): PF08241(3)  
 ORTHOMCL7216(3 genes,3 taxa): PF00036(1)  
 ORTHOMCL7221(3 genes,3 taxa): PF01753(3)  
 ORTHOMCL7226(3 genes,3 taxa): PF06083(3)  
 ORTHOMCL7234(3 genes,3 taxa):

ORTHOMCL7240(3 genes,3 taxa):  
 ORTHOMCL7243(3 genes,3 taxa):  
 ORTHOMCL7246(3 genes,3 taxa): PF00560(3) PF07679(1)  
 ORTHOMCL7279(3 genes,2 taxa): PF01663(2)  
 ORTHOMCL7323(3 genes,3 taxa): PF02233(3) PF01262(3) PF05222(3)  
 ORTHOMCL7368(3 genes,3 taxa): PF01549(3) PF01400(3)  
 ORTHOMCL7414(3 genes,3 taxa):  
 ORTHOMCL7456(3 genes,3 taxa): PF00008(1) PF07645(1) PF00093(3)  
 ORTHOMCL7464(3 genes,2 taxa): PF07690(3)  
 ORTHOMCL7478(3 genes,2 taxa): PF08560(3)  
 ORTHOMCL7488(3 genes,3 taxa): PF00095(1) PF00042(1)  
 ORTHOMCL7519(3 genes,3 taxa):  
 ORTHOMCL7537(3 genes,3 taxa): PF00201(3)  
 ORTHOMCL7562(3 genes,2 taxa):  
 ORTHOMCL7842(3 genes,2 taxa): PF08344(1) PF00023(1) PF00520(1)  
 ORTHOMCL7849(3 genes,3 taxa): PF07690(3)  
 ORTHOMCL7856(3 genes,2 taxa):  
 ORTHOMCL7882(3 genes,3 taxa): PF00036(3)  
 ORTHOMCL7912(3 genes,2 taxa): PF00018(3)  
 ORTHOMCL7942(3 genes,3 taxa):  
 ORTHOMCL7990(3 genes,2 taxa):  
 ORTHOMCL8009(3 genes,3 taxa): PF00096(3)  
 ORTHOMCL8075(3 genes,3 taxa): PF02274(3)  
 ORTHOMCL8080(3 genes,3 taxa):  
 ORTHOMCL8111(3 genes,3 taxa): PF06027(3)  
 ORTHOMCL8117(3 genes,3 taxa): PF06220(1) PF02931(3) PF00397(1) PF02932(3)  
 ORTHOMCL8137(3 genes,3 taxa): PF03860(1) PF07885(3)  
 ORTHOMCL8140(3 genes,3 taxa): PF00412(3)  
 ORTHOMCL8156(3 genes,3 taxa): PF03526(1)  
 ORTHOMCL8159(3 genes,3 taxa):  
 ORTHOMCL8161(3 genes,2 taxa): PF00134(3)  
 ORTHOMCL8163(3 genes,2 taxa): PF02310(3) PF02607(3) PF02574(3) PF02965(3) PF00809(3)  
 ORTHOMCL8171(3 genes,2 taxa): PF01607(2) PF00057(2)  
 ORTHOMCL8193(3 genes,2 taxa):  
 ORTHOMCL8419(2 genes,2 taxa): PF00560(1)  
 ORTHOMCL8488(2 genes,2 taxa): PF06469(2)  
 ORTHOMCL8598(2 genes,2 taxa): PF06419(2)  
 ORTHOMCL8613(2 genes,2 taxa): PF00520(1)  
 ORTHOMCL8652(2 genes,2 taxa): PF08447(2)  
 ORTHOMCL8659(2 genes,2 taxa): PF00042(2)  
 ORTHOMCL8663(2 genes,2 taxa):  
 ORTHOMCL8713(2 genes,2 taxa): PF00621(2)  
 ORTHOMCL8716(2 genes,2 taxa):  
 ORTHOMCL8740(2 genes,2 taxa):  
 ORTHOMCL8747(2 genes,2 taxa): PF01285(2)  
 ORTHOMCL8772(2 genes,2 taxa):  
 ORTHOMCL8799(2 genes,2 taxa):  
 ORTHOMCL8825(2 genes,2 taxa): PF00076(2)  
 ORTHOMCL8829(2 genes,2 taxa): PF00095(1) PF00080(2) PF01826(1) PF00086(1)  
 ORTHOMCL8834(2 genes,2 taxa): PF08423(1)  
 ORTHOMCL8855(2 genes,2 taxa):  
 ORTHOMCL8892(2 genes,2 taxa): PF00188(2) PF01549(2)  
 ORTHOMCL8911(2 genes,2 taxa): PF00989(1) PF00010(2)  
 ORTHOMCL8933(2 genes,2 taxa): PF01163(1) PF00646(1) PF00400(2)  
 ORTHOMCL8939(2 genes,2 taxa): PF07156(2) PF07992(1)  
 ORTHOMCL8955(2 genes,2 taxa):  
 ORTHOMCL8959(2 genes,2 taxa): PF08366(1)

ORTHOMCL8966(2 genes,2 taxa): PF02197(2)  
 ORTHOMCL9030(2 genes,2 taxa):  
 ORTHOMCL9033(2 genes,2 taxa): PF00292(2)  
 ORTHOMCL9060(2 genes,2 taxa):  
 ORTHOMCL9078(2 genes,2 taxa):  
 ORTHOMCL9084(2 genes,2 taxa):  
 ORTHOMCL9123(2 genes,2 taxa): PF00443(2)  
 ORTHOMCL9133(2 genes,2 taxa):  
 ORTHOMCL9234(2 genes,2 taxa): PF03957(1)  
 ORTHOMCL9271(2 genes,2 taxa):  
 ORTHOMCL9273(2 genes,2 taxa): PF00001(2)  
 ORTHOMCL9275(2 genes,2 taxa): PF03328(2)  
 ORTHOMCL9301(2 genes,2 taxa): PF00201(2)  
 ORTHOMCL9302(2 genes,2 taxa): PF00169(1)  
 ORTHOMCL9336(2 genes,2 taxa): PF00036(2)  
 ORTHOMCL9343(2 genes,2 taxa): PF00858(2)  
 ORTHOMCL9360(2 genes,2 taxa): PF01923(2)  
 ORTHOMCL9361(2 genes,2 taxa):  
 ORTHOMCL9368(2 genes,2 taxa): PF03489(2)  
 ORTHOMCL9428(2 genes,2 taxa): PF00560(2)  
 ORTHOMCL9451(2 genes,2 taxa):  
 ORTHOMCL9467(2 genes,2 taxa): PF00096(2)  
 ORTHOMCL9471(2 genes,2 taxa): PF00001(2)  
 ORTHOMCL9472(2 genes,2 taxa):  
 ORTHOMCL9475(2 genes,2 taxa): PF00179(2)  
 ORTHOMCL9477(2 genes,2 taxa):  
 ORTHOMCL9483(2 genes,2 taxa): PF00903(2)  
 ORTHOMCL9490(2 genes,2 taxa):  
 ORTHOMCL9499(2 genes,2 taxa): PF00201(1)  
 ORTHOMCL9503(2 genes,2 taxa):  
 ORTHOMCL9514(2 genes,2 taxa):  
 ORTHOMCL9524(2 genes,2 taxa):  
 ORTHOMCL9537(2 genes,2 taxa): PF07714(2)  
 ORTHOMCL9546(2 genes,2 taxa): PF02931(1) PF01549(2)  
 ORTHOMCL9548(2 genes,2 taxa): PF02985(2)  
 ORTHOMCL9565(2 genes,2 taxa): PF00060(1)  
 ORTHOMCL9570(2 genes,2 taxa):  
 ORTHOMCL9601(2 genes,2 taxa): PF02140(1)  
 ORTHOMCL9625(2 genes,2 taxa): PF01484(2) PF01391(2)  
 ORTHOMCL9635(2 genes,2 taxa): PF00431(1) PF01400(2)  
 ORTHOMCL9638(2 genes,2 taxa): PF07690(1)  
 ORTHOMCL9641(2 genes,2 taxa): PF00001(2)  
 ORTHOMCL9643(2 genes,2 taxa):  
 ORTHOMCL9645(2 genes,2 taxa):  
 ORTHOMCL9654(2 genes,2 taxa): PF00612(1) PF00063(1) PF00784(2)  
 ORTHOMCL9672(2 genes,2 taxa): PF00042(2)  
 ORTHOMCL9676(2 genes,2 taxa): PF01039(2)  
 ORTHOMCL9695(2 genes,2 taxa):  
 ORTHOMCL9700(2 genes,2 taxa): PF02460(2) PF01336(1)  
 ORTHOMCL9702(2 genes,2 taxa): PF00096(2)  
 ORTHOMCL10314(2 genes,2 taxa): PF07885(2)  
 ORTHOMCL10602(2 genes,2 taxa): PF00105(2)  
 ORTHOMCL10608(2 genes,2 taxa): PF00664(2) PF00005(2)  
 ORTHOMCL10856(2 genes,2 taxa):  
 ORTHOMCL10913(2 genes,2 taxa): PF03028(2)  
 ORTHOMCL10934(2 genes,2 taxa): PF00560(1)  
 ORTHOMCL11090(2 genes,2 taxa): PF01391(2)



ORTHOMCL11146(2 genes,2 taxa): PF00104(1)  
ORTHOMCL11221(2 genes,2 taxa):  
ORTHOMCL11236(2 genes,2 taxa):  
ORTHOMCL11249(2 genes,2 taxa): PF07690(1) PF00083(1)  
ORTHOMCL11254(2 genes,2 taxa):  
ORTHOMCL11264(2 genes,2 taxa): PF00402(2)  
ORTHOMCL11297(2 genes,2 taxa):  
ORTHOMCL11304(2 genes,2 taxa): PF00782(1)  
ORTHOMCL11307(2 genes,2 taxa):  
ORTHOMCL11314(2 genes,2 taxa):  
ORTHOMCL11333(2 genes,2 taxa): PF02690(2)  
ORTHOMCL11350(2 genes,2 taxa): PF02852(2) PF07992(2) PF00070(2)  
ORTHOMCL11412(2 genes,2 taxa): PF00110(2)  
ORTHOMCL11425(2 genes,2 taxa): PF00620(1) PF00095(1)  
ORTHOMCL11446(2 genes,2 taxa): PF00339(2)  
ORTHOMCL11461(2 genes,2 taxa): PF00050(2) PF07648(2)  
ORTHOMCL11465(2 genes,2 taxa): PF01166(2)  
ORTHOMCL11589(2 genes,2 taxa):  
ORTHOMCL11616(2 genes,2 taxa): PF04419(2)  
ORTHOMCL11624(2 genes,2 taxa):  
ORTHOMCL11645(2 genes,2 taxa): PF01392(2)  
ORTHOMCL11668(2 genes,2 taxa):  
ORTHOMCL11761(2 genes,2 taxa): PF06602(1)  
ORTHOMCL11814(2 genes,2 taxa): PF08357(2)  
ORTHOMCL11815(2 genes,2 taxa): PF05631(2)  
ORTHOMCL11843(2 genes,2 taxa): PF01642(2) PF02310(2)  
ORTHOMCL11849(2 genes,2 taxa): PF07885(2)  
ORTHOMCL11867(2 genes,2 taxa):

---

**Supplementary Table 5.** Protein families expanded or contracted in *C. elegans* compared to *T. spiralis* when proteome size difference was taken into consideration. All these family changes are significant after bonferroni correction. Only the most abundant domain in this family is presented. In parenthesis is the number of genes associated with this PF id.

| <b>Orthologous family ID (#genes, #taxa)</b> | <b><i>C. elegans</i> genes</b> | <b><i>T. spiralis</i> genes</b> | <b>Total genes genes</b> | <b>Pfam id§</b> | <b>Hypergeometric test P value</b> |
|----------------------------------------------|--------------------------------|---------------------------------|--------------------------|-----------------|------------------------------------|
| ORTHOMCL1(268 genes,6 taxa):                 | 1                              | 260                             | 261                      | PF04573(8)      | 0.000000                           |
| ORTHOMCL0(421 genes,4 taxa):                 | 2                              | 201                             | 203                      | PF05380(100)    | 0.000000                           |
| ORTHOMCL8(142 genes,2 taxa):                 | 2                              | 140                             | 142                      | PF02171(70)     | 0.000000                           |
| ORTHOMCL24(77 genes,6 taxa):                 | 3                              | 68                              | 71                       | PF00098(8)      | 0.000000                           |
| ORTHOMCL18(91 genes,6 taxa):                 | 3                              | 57                              | 60                       | PF00665(24)     | 0.000000                           |
| ORTHOMCL66(46 genes,3 taxa):                 | 1                              | 44                              | 45                       | PF09091(4)      | 0.000000                           |
| ORTHOMCL266(18 genes,3 taxa):                | 1                              | 16                              | 17                       | PF00146(18)     | 0.000021                           |
| ORTHOMCL40(59 genes,4 taxa):                 | 33                             | 5                               | 38                       | PF00635(59)     | 0.000033                           |
| ORTHOMCL208(21 genes,4 taxa):                | 2                              | 17                              | 19                       | PF00300(21)     | 0.000053                           |
| ORTHOMCL353(15 genes,2 taxa):                | 1                              | 14                              | 15                       | PF00096(12)     | 0.000096                           |
| ORTHOMCL279(17 genes,4 taxa):                | 1                              | 14                              | 15                       | -               | 0.000096                           |
| ORTHOMCL153(26 genes,6 taxa):                | 20                             | 1                               | 21                       | PF00097(14)     | 0.000074                           |
| ORTHOMCL32(65 genes,6 taxa):                 | 19                             | 1                               | 20                       | PF00067(65)     | 0.000127                           |
| ORTHOMCL38(60 genes,6 taxa):                 | 24                             | 3                               | 27                       | PF00188(59)     | 0.000194                           |
| ORTHOMCL141(28 genes,3 taxa):                | 18                             | 1                               | 19                       | PF07801(16)     | 0.000217                           |

**Supplementary Table 6.** Genome rearrangements based on OrthoCluster <sup>2</sup>. Ce, *C. elegans*; Cb, *C. briggsae*; Bm, *B. malayi*; Ts, *T. spiralis*.

**Genome re-arrangement statistics**

|                                                  |            | <b>Ce/Cb</b> | <b>Ce/Bm</b> | <b>Ce/Ts</b> |
|--------------------------------------------------|------------|--------------|--------------|--------------|
| Number of insertions / deletions                 |            | 356          | 9            | 11           |
| Number of inversions                             |            | 4454         | 964          | 705          |
| Number of reciprocal translocations              | total      | 5991         | 1031         | 759          |
|                                                  | nested     | 1328         | 299          | 363          |
|                                                  | non-nested | 4663         | 732          | 390          |
| Number of transpositions                         |            | 389          | 0            | 2            |
| The synteny conservation between the two genomes |            | 0.752        | 0.508        | 0.28         |

**Supplementary Tables 7.** Orthology map created using orthologous genes among three species spanning the phylum (*C. elegans*, *B. malayi* and *T. spiralis*).

| Chr | Start      | Stop       | Region (bp) |   | B. malayi             | Start     | Stop      | Region (bp) |   | T. spiralis             |
|-----|------------|------------|-------------|---|-----------------------|-----------|-----------|-------------|---|-------------------------|
| I   | 8,235,980  | 8,508,639  | 272,659     | + | bma1.assembly.10416.0 | 2,997,849 | 3,218,703 | 220,854     | + | SUPERLINK_TRISPI_SCTG4  |
| I   | 7,522,515  | 7,814,546  | 292,031     | + | bma1.assembly.8466.0  | 35,587    | 54,918    | 19,331      | + | SUPERLINK_TRISPI_SCTG4  |
| I   | 5,227,247  | 5,605,779  | 378,532     | + | bma1.assembly.8116.0  | 1,393     | 16,621    | 15,228      | - | SUPERLINK_TRISPI_SCTG4  |
| I   | 5,605,779  | 5,648,376  | 42,597      | + | bma1.assembly.7718.0  | 39,553    | 54,762    | 15,209      | + | SUPERLINK_TRISPI_SCTG22 |
| I   | 1,865,315  | 1,994,537  | 129,222     | + | bma1.assembly.9349.0  | 4,634     | 141,102   | 136,468     | + | SUPERLINK_TRISPI_SCTG13 |
| I   | 7,380,133  | 7,522,515  | 142,382     | + | bma1.assembly.10045.0 | 175,503   | 294,742   | 119,239     | - | SUPERLINK_TRISPI_SCTG12 |
| I   | 4,319,286  | 4,476,521  | 157,235     | + | bma1.assembly.10238.0 | 11,348    | 15,714    | 4,366       | + | SUPERLINK_TRISPI_SCTG1  |
| I   | 4,597,037  | 4,781,793  | 184,756     | + | bma1.assembly.10416.0 | 904,139   | 1,394,422 | 490,283     | + | SUPERLINK_TRISPI_SCTG0  |
| I   | 1,234,457  | 1,555,692  | 321,235     | + | bma1.assembly.9572.0  | 2,418,175 | 3,611,491 | 1,193,316   | - | SUPERLINK_TRISPI_SCTG0  |
|     |            |            | 1,920,649   |   |                       |           |           |             |   |                         |
| I   | 9,557,441  | 10,069,569 | 512,128     | + | bma1.assembly.8997.0  | 7,189     | 16,834    | 9,645       | - | NA                      |
| I   | 6,047,622  | 6,609,563  | 561,941     | + | bma1.assembly.8962.0  | 10,853    | 30,571    | 19,718      | + | NA                      |
| I   | 9,150,795  | 9,557,441  | 406,646     | + | bma1.assembly.9943.0  | 103,371   | 145,901   | 42,530      | - | NA                      |
| I   | 9,135,536  | 9,150,795  | 15,259      | + | bma1.assembly.8563.0  | 4,878     | 17,034    | 12,156      | + | NA                      |
| I   | 10,069,569 | 10,289,186 | 219,617     | + | bma1.assembly.6764.0  | 23,849    | 32,841    | 8,992       | - | NA                      |
| I   | 10,809,931 | 11,462,529 | 652,598     | + | bma1.assembly.12171.0 | 20,528    | 28,441    | 7,913       | - | NA                      |
| I   | 11,462,529 | 12,003,354 | 540,825     | + | bma1.assembly.10045.0 | 294,742   | 358,402   | 63,660      | - | NA                      |
| I   | 10,289,186 | 10,539,750 | 250,564     | + | bma1.assembly.10416.0 | 526,582   | 904,139   | 377,557     | - | NA                      |
| I   | 10,539,750 | 10,809,931 | 270,181     | + | bma1.assembly.10244.0 | 69,725    | 100,855   | 31,130      | + | NA                      |
| I   | 6,609,563  | 7,226,081  | 616,518     | + | bma1.assembly.10416.0 | 2,424,167 | 2,634,167 | 210,000     | - | NA                      |
| I   | 8,599,105  | 8,608,706  | 9,601       | + | bma1.assembly.7615.0  | 12,836    | 20,678    | 7,842       | + | NA                      |
| I   | 5,648,376  | 5,777,217  | 128,841     | + | bma1.assembly.10045.0 | 83,524    | 175,503   | 91,979      | + | NA                      |
| I   | 5,777,217  | 5,946,116  | 168,899     | + | bma1.assembly.7792.0  | 0         | 7,751     | 7,751       | + | NA                      |
| I   | 5,946,116  | 6,047,622  | 101,506     | + | bma1.assembly.7283.0  | 11,077    | 21,462    | 10,385      | + | NA                      |
| I   | 8,608,706  | 8,843,966  | 235,260     | + | bma1.assembly.9943.0  | 49,858    | 103,371   | 53,513      | - | NA                      |
| I   | 8,843,966  | 9,135,536  | 291,570     | + | bma1.assembly.10416.0 | 1,394,422 | 1,555,878 | 161,456     | - | NA                      |
| I   | 7,226,081  | 7,380,133  | 154,052     | + | bma1.assembly.10416.0 | 1,776,901 | 2,057,417 | 280,516     | + | NA                      |
| I   | 7,814,546  | 8,235,980  | 421,434     | + | bma1.assembly.10416.0 | 1,697,709 | 1,776,901 | 79,192      | + | NA                      |
| I   | 8,508,639  | 8,599,105  | 90,466      | + | bma1.assembly.8319.0  | 62,901    | 76,320    | 13,419      | + | NA                      |
| I   | 1,994,537  | 2,270,633  | 276,096     | + | bma1.assembly.7316.0  | 4,968     | 12,016    | 7,048       | - | NA                      |
| I   | 3,043,739  | 3,071,190  | 27,451      | + | bma1.assembly.8582.0  | 21,739    | 31,315    | 9,576       | + | NA                      |
| I   | 3,071,190  | 3,281,671  | 210,481     | + | bma1.assembly.10416.0 | 2,057,417 | 2,424,167 | 366,750     | - | NA                      |
| I   | 2,270,633  | 2,750,564  | 479,931     | + | bma1.assembly.10028.0 | 267,936   | 278,256   | 10,320      | - | NA                      |
| I   | 2,750,564  | 3,043,739  | 293,175     | + | bma1.assembly.10045.0 | 358,402   | 372,417   | 14,015      | + | NA                      |
| I   | 4,055,158  | 4,319,286  | 264,128     | + | bma1.assembly.9732.0  | 330,622   | 356,073   | 25,451      | + | NA                      |
| I   | 4,476,521  | 4,597,037  | 120,516     | + | bma1.assembly.10244.0 | 24,193    | 69,725    | 45,532      | - | NA                      |
| I   | 3,281,671  | 3,667,799  | 386,128     | + | bma1.assembly.10416.0 | 2,634,167 | 2,784,739 | 150,572     | + | NA                      |
| I   | 4,781,793  | 5,227,247  | 445,454     | + | bma1.assembly.10244.0 | 4,027     | 24,193    | 20,166      | + | NA                      |
| I   | 3,667,799  | 4,055,158  | 387,359     | + | bma1.assembly.8536.0  | 2,012     | 9,593     | 7,581       | - | NA                      |
| I   | 1,053,364  | 1,234,457  | 181,093     | + | bma1.assembly.10416.0 | 1,555,878 | 1,620,995 | 65,117      | - | NA                      |
| I   | 1,555,692  | 1,767,298  | 211,606     | + | bma1.assembly.8437.0  | 9,907     | 18,772    | 8,865       | - | NA                      |
| I   | 1,767,298  | 1,865,315  | 98,017      | + | bma1.assembly.9554.0  | 104,939   | 114,035   | 9,096       | - | NA                      |
|     |            |            | 9,029,341   |   |                       |           |           |             |   |                         |
| II  | 10,992,685 | 11,210,952 | 218,267     | + | bma1.assembly.6646.0  | 38,651    | 83,172    | 44,521      | - | SUPERLINK_TRISPI_SCTG25 |
| II  | 5,254,196  | 5,970,119  | 715,923     | + | bma1.assembly.9885.0  | 362,952   | 386,979   | 24,027      | - | SUPERLINK_TRISPI_SCTG12 |
| II  | 14,812,900 | 15,276,584 | 463,684     | + | bma1.assembly.8500.0  | 19,865    | 31,013    | 11,148      | - | SUPERLINK_TRISPI_SCTG10 |
| II  | 7,798,515  | 8,240,888  | 442,373     | + | bma1.assembly.9921.0  | 229,786   | 411,982   | 182,196     | - | SUPERLINK_TRISPI_SCTG0  |

|     |            |            |                       |   |                       |           |           |         |   |                         |
|-----|------------|------------|-----------------------|---|-----------------------|-----------|-----------|---------|---|-------------------------|
| II  | 10,866,825 | 10,992,685 | 125,860<br>1,966,107  | + | bma1.assembly.6686.0  | 93,222    | 103,688   | 10,466  | - | SUPERLINK_TRISPI_SCTG0  |
| II  | 8,583,616  | 8,738,850  | 155,234               | + | bma1.assembly.8792.0  | 41,557    | 64,272    | 22,715  | + | NA                      |
| II  | 8,960,834  | 9,363,459  | 402,625               | + | bma1.assembly.9885.0  | 386,979   | 437,807   | 50,828  | - | NA                      |
| II  | 6,442,012  | 6,782,814  | 340,802               | + | bma1.assembly.10462.0 | 65,926    | 96,396    | 30,470  | + | NA                      |
| II  | 952,395    | 1,876,525  | 924,130               | + | bma1.assembly.7707.0  | 2,487     | 12,892    | 10,405  | + | NA                      |
| II  | 6,782,814  | 7,317,994  | 535,180               | + | bma1.assembly.7864.0  | 83,221    | 102,264   | 19,043  | - | NA                      |
| II  | 7,317,994  | 7,798,515  | 480,521               | + | bma1.assembly.8973.0  | 932,932   | 1,005,315 | 72,383  | - | NA                      |
| II  | 8,738,850  | 8,960,834  | 221,984               | + | bma1.assembly.8704.0  | 95,186    | 103,962   | 8,776   | + | NA                      |
| II  | 8,240,888  | 8,583,616  | 342,728               | + | bma1.assembly.9885.0  | 437,807   | 621,300   | 183,493 | + | NA                      |
| II  | 9,363,459  | 9,780,550  | 417,091               | + | bma1.assembly.8448.0  | 4,128     | 12,122    | 7,994   | - | NA                      |
| II  | 11,409,890 | 12,129,877 | 719,987               | + | bma1.assembly.6590.0  | 30,001    | 35,904    | 5,903   | + | NA                      |
| II  | 11,346,963 | 11,409,890 | 62,927                | + | bma1.assembly.6646.0  | 3,161     | 38,651    | 35,490  | + | NA                      |
| II  | 10,429,489 | 10,839,820 | 410,331               | + | bma1.assembly.9843.0  | 39,253    | 47,150    | 7,897   | + | NA                      |
| II  | 13,467,624 | 13,547,683 | 80,059                | + | bma1.assembly.9175.0  | 2,719     | 15,312    | 12,593  | - | NA                      |
| II  | 13,087,313 | 13,467,624 | 380,311               | + | bma1.assembly.8091.0  | 177,957   | 190,019   | 12,062  | + | NA                      |
| II  | 12,129,877 | 13,087,313 | 957,436               | + | bma1.assembly.7165.0  | 11,602    | 28,256    | 16,654  | + | NA                      |
| II  | 9,999,450  | 10,429,489 | 430,039               | + | bma1.assembly.8973.0  | 220,601   | 487,346   | 266,745 | + | NA                      |
| II  | 9,780,550  | 9,999,450  | 218,900               | + | bma1.assembly.9126.0  | 37,661    | 42,464    | 4,803   | + | NA                      |
| II  | 11,322,741 | 11,346,963 | 24,222                | + | bma1.assembly.8973.0  | 487,346   | 750,164   | 262,818 | + | NA                      |
| II  | 11,210,952 | 11,322,741 | 111,789               | + | bma1.assembly.9921.0  | 144,945   | 229,786   | 84,841  | - | NA                      |
| II  | 10,839,820 | 10,866,825 | 27,005                | + | bma1.assembly.6449.0  | 24,109    | 32,768    | 8,659   | + | NA                      |
| II  | 1,876,525  | 2,669,570  | 793,045               | + | bma1.assembly.8973.0  | 750,164   | 828,693   | 78,529  | - | NA                      |
| II  | 2,669,570  | 3,501,828  | 832,258               | + | bma1.assembly.8973.0  | 828,693   | 932,932   | 104,239 | + | NA                      |
| II  | 13,962,517 | 14,812,900 | 850,383               | + | bma1.assembly.9950.0  | 18,916    | 30,830    | 11,914  | + | NA                      |
| II  | 13,547,683 | 13,962,517 | 414,834               | + | bma1.assembly.8967.0  | 1,977     | 14,673    | 12,696  | - | NA                      |
| II  | 579,619    | 952,395    | 372,776               | + | bma1.assembly.9885.0  | 621,300   | 779,996   | 158,696 | + | NA                      |
| II  | 4,992,192  | 5,254,196  | 262,004               | + | bma1.assembly.8973.0  | 1,005,315 | 1,038,355 | 33,040  | - | NA                      |
| II  | 5,970,119  | 6,301,594  | 331,475               | + | bma1.assembly.8792.0  | 27,051    | 41,557    | 14,506  | - | NA                      |
| II  | 6,301,594  | 6,442,012  | 140,418               | + | bma1.assembly.9921.0  | 98,141    | 144,945   | 46,804  | + | NA                      |
| II  | 3,501,828  | 4,225,388  | 723,560               | + | bma1.assembly.7212.0  | 5,552     | 30,473    | 24,921  | + | NA                      |
| II  | 4,225,388  | 4,637,879  | 412,491               | + | bma1.assembly.8705.0  | 8,153     | 15,911    | 7,758   | + | NA                      |
| II  | 4,637,879  | 4,992,192  | 354,313<br>12,730,858 | + | bma1.assembly.9106.0  | 7,383     | 14,933    | 7,550   | + | NA                      |
| III | 5,161,741  | 5,241,610  | 79,869                | + | bma1.assembly.8182.0  | 20,204    | 34,844    | 14,640  | + | SUPERLINK_TRISPI_SCTG8  |
| III | 4,652,464  | 4,859,435  | 206,971               | + | bma1.assembly.7976.0  | 1,664     | 13,231    | 11,567  | - | SUPERLINK_TRISPI_SCTG8  |
| III | 8,126,095  | 8,194,138  | 68,043                | + | bma1.assembly.9648.0  | 77,426    | 376,575   | 299,149 | - | SUPERLINK_TRISPI_SCTG8  |
| III | 7,671,403  | 7,812,830  | 141,427               | + | bma1.assembly.9619.0  | 1,725     | 7,199     | 5,474   | - | SUPERLINK_TRISPI_SCTG13 |
| III | 10,404,047 | 10,590,002 | 185,955               | + | bma1.assembly.8611.0  | 0         | 11,078    | 11,078  | - | SUPERLINK_TRISPI_SCTG0  |
| III | 7,553,346  | 7,671,403  | 118,057               | + | bma1.assembly.10549.0 | 10,150    | 16,914    | 6,764   | + | SUPERLINK_TRISPI_SCTG0  |
| III | 13,531,304 | 13,626,784 | 95,480                | + | bma1.assembly.6852.0  | 39,444    | 44,463    | 5,019   | + | SUPERLINK_TRISPI_SCTG0  |
| III | 352,862    | 1,881,597  | 1,528,735             | + | bma1.assembly.10481.0 | 195,438   | 210,460   | 15,022  | - | SUPERLINK_TRISPI_SCTG0  |
| III | 8,942,944  | 9,482,619  | 539,675               | + | bma1.assembly.9648.0  | 376,575   | 770,829   | 394,254 | - | SUPERLINK_TRISPI_SCTG0  |
| III | 187,840    | 352,862    | 165,022<br>3,129,234  | + | bma1.assembly.9648.0  | 905,551   | 1,030,733 | 125,182 | + | SUPERLINK_TRISPI_SCTG0  |
| III | 6,337,837  | 6,813,996  | 476,159               | + | bma1.assembly.9491.0  | 26,420    | 37,950    | 11,530  | - | NA                      |
| III | 4,859,435  | 4,926,754  | 67,319                | + | bma1.assembly.8837.0  | 35,312    | 43,850    | 8,538   | - | NA                      |
| III | 4,926,754  | 4,971,191  | 44,437                | + | bma1.assembly.9920.0  | 7,835     | 15,096    | 7,261   | - | NA                      |
| III | 5,353,594  | 5,619,565  | 265,971               | + | bma1.assembly.8457.0  | 22,585    | 32,014    | 9,429   | + | NA                      |
| III | 2,708,740  | 2,803,612  | 94,872                | + | bma1.assembly.10494.0 | 30,463    | 33,942    | 3,479   | - | NA                      |
| III | 4,445,770  | 4,484,528  | 38,758                | + | bma1.assembly.9277.0  | 29,195    | 41,145    | 11,950  | + | NA                      |

|     |            |            |           |   |                       |           |           |           |   |                         |
|-----|------------|------------|-----------|---|-----------------------|-----------|-----------|-----------|---|-------------------------|
| III | 4,484,528  | 4,652,464  | 167,936   | + | bma1.assembly.10481.0 | 309,399   | 404,382   | 94,983    | - | NA                      |
| III | 5,619,565  | 5,863,136  | 243,571   | + | bma1.assembly.6959.0  | 19,706    | 31,555    | 11,849    | - | NA                      |
| III | 5,863,136  | 6,046,506  | 183,370   | + | bma1.assembly.8186.0  | 8,618     | 22,137    | 13,519    | + | NA                      |
| III | 4,971,191  | 5,081,149  | 109,958   | + | bma1.assembly.7627.0  | 23,765    | 37,580    | 13,815    | + | NA                      |
| III | 5,081,149  | 5,161,741  | 80,592    | + | bma1.assembly.8931.0  | 2,541     | 11,745    | 9,204     | + | NA                      |
| III | 5,241,610  | 5,353,594  | 111,984   | + | bma1.assembly.8572.0  | 120,962   | 133,844   | 12,882    | - | NA                      |
| III | 2,803,612  | 3,065,424  | 261,812   | + | bma1.assembly.7954.0  | 47,521    | 59,952    | 12,431    | - | NA                      |
| III | 4,175,084  | 4,214,759  | 39,675    | + | bma1.assembly.8294.0  | 17,554    | 29,964    | 12,410    | + | NA                      |
| III | 6,046,506  | 6,337,837  | 291,331   | + | bma1.assembly.10214.0 | 87,632    | 111,815   | 24,183    | + | NA                      |
| III | 1,881,597  | 2,490,639  | 609,042   | + | bma1.assembly.8931.0  | 11,745    | 22,918    | 11,173    | + | NA                      |
| III | 2,490,639  | 2,708,740  | 218,101   | + | bma1.assembly.7627.0  | 37,580    | 48,519    | 10,939    | + | NA                      |
| III | 4,214,759  | 4,331,606  | 116,847   | + | bma1.assembly.9648.0  | 770,829   | 905,551   | 134,722   | + | NA                      |
| III | 4,331,606  | 4,445,770  | 114,164   | + | bma1.assembly.10121.0 | 692,703   | 980,881   | 288,178   | + | NA                      |
| III | 3,065,424  | 3,672,484  | 607,060   | + | bma1.assembly.9838.0  | 1,015,810 | 1,218,292 | 202,482   | + | NA                      |
| III | 3,672,484  | 4,044,353  | 371,869   | + | bma1.assembly.10651.0 | 1,590     | 6,412     | 4,822     | - | NA                      |
| III | 4,044,353  | 4,175,084  | 130,731   | + | bma1.assembly.8865.0  | 6,281     | 13,627    | 7,346     | + | NA                      |
| III | 8,440,292  | 8,942,944  | 502,652   | + | bma1.assembly.8899.0  | 49,258    | 56,318    | 7,060     | + | NA                      |
| III | 8,421,679  | 8,440,292  | 18,613    | + | bma1.assembly.10214.0 | 111,815   | 125,217   | 13,402    | - | NA                      |
| III | 8,357,760  | 8,421,679  | 63,919    | + | bma1.assembly.9838.0  | 351,972   | 759,620   | 407,648   | + | NA                      |
| III | 10,003,390 | 10,278,242 | 274,852   | + | bma1.assembly.7994.0  | 26,682    | 35,484    | 8,802     | + | NA                      |
| III | 9,655,068  | 10,003,390 | 348,322   | + | bma1.assembly.9838.0  | 37,165    | 351,972   | 314,807   | - | NA                      |
| III | 9,482,619  | 9,655,068  | 172,449   | + | bma1.assembly.10121.0 | 226,408   | 355,901   | 129,493   | + | NA                      |
| III | 8,059,022  | 8,126,095  | 67,073    | + | bma1.assembly.10411.0 | 24,910    | 34,939    | 10,029    | - | NA                      |
| III | 7,941,787  | 8,059,022  | 117,235   | + | bma1.assembly.10121.0 | 152,373   | 226,408   | 74,035    | - | NA                      |
| III | 7,812,830  | 7,941,787  | 128,957   | + | bma1.assembly.9638.0  | 3,406     | 11,872    | 8,466     | + | NA                      |
| III | 8,277,317  | 8,357,760  | 80,443    | + | bma1.assembly.8739.0  | 55,385    | 60,731    | 5,346     | - | NA                      |
| III | 8,235,857  | 8,277,317  | 41,460    | + | bma1.assembly.9555.0  | 6,133     | 14,180    | 8,047     | + | NA                      |
| III | 8,194,138  | 8,235,857  | 41,719    | + | bma1.assembly.9617.0  | 194,191   | 212,649   | 18,458    | - | NA                      |
| III | 11,819,971 | 11,926,669 | 106,698   | + | bma1.assembly.9572.0  | 4,222,832 | 4,504,605 | 281,773   | + | NA                      |
| III | 11,702,146 | 11,819,971 | 117,825   | + | bma1.assembly.7618.0  | 31,077    | 38,718    | 7,641     | + | NA                      |
| III | 11,565,136 | 11,702,146 | 137,010   | + | bma1.assembly.9429.0  | 17,922    | 37,011    | 19,089    | - | NA                      |
| III | 13,192,250 | 13,531,304 | 339,054   | + | bma1.assembly.9828.0  | 13,061    | 27,431    | 14,370    | - | NA                      |
| III | 12,440,744 | 13,192,250 | 751,506   | + | bma1.assembly.7218.0  | 0         | 10,490    | 10,490    | - | NA                      |
| III | 11,926,669 | 12,440,744 | 514,075   | + | bma1.assembly.7950.0  | 1,367     | 24,361    | 22,994    | + | NA                      |
| III | 10,781,694 | 10,898,919 | 117,225   | + | bma1.assembly.9707.0  | 17,072    | 28,256    | 11,184    | - | NA                      |
| III | 10,590,002 | 10,781,694 | 191,692   | + | bma1.assembly.10258.0 | 66,954    | 73,627    | 6,673     | - | NA                      |
| III | 10,278,242 | 10,404,047 | 125,805   | + | bma1.assembly.9617.0  | 212,649   | 228,807   | 16,158    | - | NA                      |
| III | 11,421,923 | 11,565,136 | 143,213   | + | bma1.assembly.8628.0  | 95,289    | 99,863    | 4,574     | + | NA                      |
| III | 11,138,756 | 11,421,923 | 283,167   | + | bma1.assembly.9838.0  | 759,620   | 1,015,810 | 256,190   | - | NA                      |
| III | 6,813,996  | 7,233,719  | 419,723   | + | bma1.assembly.10481.0 | 210,460   | 309,399   | 98,939    | + | NA                      |
| III | 7,233,719  | 7,399,296  | 165,577   | + | bma1.assembly.10121.0 | 355,901   | 692,703   | 336,802   | - | NA                      |
| III | 10,898,919 | 11,138,756 | 239,837   | + | bma1.assembly.9648.0  | 1,030,733 | 1,065,129 | 34,396    | + | NA                      |
| III | 7,399,296  | 7,553,346  | 154,050   | + | bma1.assembly.8115.0  | 0         | 11,795    | 11,795    | - | NA                      |
| IV  | 10,665,070 | 11,874,980 | 1,209,910 | + | bma1.assembly.7884.0  | 42,768    | 50,825    | 8,057     | - | SUPERLINK_TRISPI_SCTG7  |
| IV  | 13,340,860 | 13,579,823 | 238,963   | + | bma1.assembly.9114.0  | 3,029     | 11,006    | 7,977     | - | SUPERLINK_TRISPI_SCTG5  |
| IV  | 6,622,809  | 7,000,288  | 377,479   | + | bma1.assembly.10014.0 | 891,419   | 906,810   | 15,391    | + | SUPERLINK_TRISPI_SCTG2  |
| IV  | 7,000,288  | 7,565,397  | 565,109   | + | bma1.assembly.9572.0  | 124,183   | 286,035   | 161,852   | - | SUPERLINK_TRISPI_SCTG2  |
| IV  | 16,281,071 | 17,104,670 | 823,599   | + | bma1.assembly.9016.0  | 16,861    | 22,673    | 5,812     | + | SUPERLINK_TRISPI_SCTG11 |
| IV  | 7,565,397  | 7,705,389  | 139,992   | + | bma1.assembly.9572.0  | 6,156,543 | 6,203,346 | 46,803    | - | SUPERLINK_TRISPI_SCTG1  |
| IV  | 7,844,648  | 9,209,915  | 1,365,267 | + | bma1.assembly.9572.0  | 4,504,605 | 4,994,848 | 490,243   | + | SUPERLINK_TRISPI_SCTG1  |
| IV  | 9,209,915  | 10,138,043 | 928,128   | + | bma1.assembly.10224.0 | 87,038    | 210,577   | 123,539   | - | SUPERLINK_TRISPI_SCTG1  |
| IV  | 13,579,823 | 13,833,911 | 254,088   | + | bma1.assembly.9572.0  | 286,035   | 2,418,175 | 2,132,140 | + | SUPERLINK_TRISPI_SCTG1  |

5,902,535

|    |            |            |           |   |                       |           |           |         |   |                        |
|----|------------|------------|-----------|---|-----------------------|-----------|-----------|---------|---|------------------------|
| IV | 13,833,911 | 14,129,053 | 295,142   | + | bma1.assembly.7798.0  | 10,549    | 16,105    | 5,556   | - | NA                     |
| IV | 1,471,996  | 3,952,396  | 2,480,400 | + | bma1.assembly.7948.0  | 714       | 15,767    | 15,053  | - | NA                     |
| IV | 442,985    | 1,471,996  | 1,029,011 | + | bma1.assembly.10416.0 | 1,620,995 | 1,697,709 | 76,714  | + | NA                     |
| IV | 14,914,540 | 16,281,071 | 1,366,531 | + | bma1.assembly.9572.0  | 3,913,938 | 4,055,679 | 141,741 | - | NA                     |
| IV | 14,129,053 | 14,914,540 | 785,487   | + | bma1.assembly.10224.0 | 210,577   | 237,294   | 26,717  | - | NA                     |
| IV | 10,138,043 | 10,665,070 | 527,027   | + | bma1.assembly.9572.0  | 3,611,491 | 3,756,286 | 144,795 | - | NA                     |
| IV | 7,705,389  | 7,844,648  | 139,259   | + | bma1.assembly.8924.0  | 61,546    | 70,219    | 8,673   | - | NA                     |
| IV | 5,855,264  | 6,622,809  | 767,545   | + | bma1.assembly.10014.0 | 906,810   | 924,948   | 18,138  | + | NA                     |
| IV | 12,933,990 | 13,340,860 | 406,870   | + | bma1.assembly.6760.0  | 6,211     | 16,459    | 10,248  | - | NA                     |
| IV | 3,952,396  | 5,855,264  | 1,902,868 | + | bma1.assembly.6680.0  | 17,252    | 26,069    | 8,817   | - | NA                     |
| IV | 11,874,980 | 12,933,990 | 1,059,010 | + | bma1.assembly.8656.0  | 11,309    | 18,496    | 7,187   | + | NA                     |
| V  | 7,060,568  | 7,487,394  | 426,826   | + | bma1.assembly.10301.0 | 256,345   | 966,176   | 709,831 | - | SUPERLINK_TRISPI_SCTG7 |
| V  | 6,883,841  | 7,060,568  | 176,727   | + | bma1.assembly.10301.0 | 3,222,859 | 3,437,935 | 215,076 | - | SUPERLINK_TRISPI_SCTG1 |
|    |            |            | 603,553   |   |                       |           |           |         |   |                        |
| V  | 7,487,394  | 8,120,600  | 633,206   | + | bma1.assembly.7797.0  | 20,147    | 25,399    | 5,252   | + | NA                     |
| V  | 6,378,926  | 6,883,841  | 504,915   | + | bma1.assembly.10365.0 | 271,629   | 284,822   | 13,193  | - | NA                     |
| V  | 10,386,403 | 10,747,052 | 360,649   | + | bma1.assembly.10301.0 | 1,634,955 | 2,474,572 | 839,617 | - | NA                     |
| V  | 9,973,623  | 10,386,403 | 412,780   | + | bma1.assembly.10301.0 | 2,925,039 | 3,222,859 | 297,820 | - | NA                     |
| V  | 9,122,430  | 9,973,623  | 851,193   | + | bma1.assembly.8228.0  | 3,975     | 18,717    | 14,742  | - | NA                     |
| V  | 8,120,600  | 9,122,430  | 1,001,830 | + | bma1.assembly.10365.0 | 284,822   | 349,980   | 65,158  | + | NA                     |
| V  | 1,968,505  | 3,134,236  | 1,165,731 | + | bma1.assembly.10301.0 | 2,474,572 | 2,925,039 | 450,467 | - | NA                     |
| V  | 1,108,165  | 1,968,505  | 860,340   | + | bma1.assembly.6685.0  | 4,289     | 25,407    | 21,118  | - | NA                     |
| V  | 233,441    | 1,108,165  | 874,724   | + | bma1.assembly.8230.0  | 15,362    | 28,436    | 13,074  | - | NA                     |
| V  | 103,830    | 233,441    | 129,611   | + | bma1.assembly.10416.0 | 2,784,739 | 2,997,849 | 213,110 | + | NA                     |
| V  | 5,920,293  | 6,378,926  | 458,633   | + | bma1.assembly.8921.0  | 24,646    | 36,482    | 11,836  | + | NA                     |
| V  | 5,241,384  | 5,920,293  | 678,909   | + | bma1.assembly.8560.0  | 35,831    | 43,665    | 7,834   | - | NA                     |
| V  | 4,445,322  | 5,241,384  | 796,062   | + | bma1.assembly.10301.0 | 966,176   | 1,634,955 | 668,779 | - | NA                     |
| V  | 3,134,236  | 4,445,322  | 1,311,086 | + | bma1.assembly.8789.0  | 34,128    | 42,363    | 8,235   | - | NA                     |
| V  | 12,647,113 | 15,342,895 | 2,695,782 | + | bma1.assembly.7697.0  | 12,493    | 19,096    | 6,603   | - | NA                     |
| V  | 15,342,895 | 18,806,609 | 3,463,714 | + | bma1.assembly.9435.0  | 11,113    | 29,504    | 18,391  | + | NA                     |
| V  | 18,806,609 | 19,937,327 | 1,130,718 | + | bma1.assembly.9528.0  | 71,969    | 77,350    | 5,381   | + | NA                     |
| V  | 10,747,052 | 11,105,988 | 358,936   | + | bma1.assembly.10365.0 | 349,980   | 413,930   | 63,950  | + | NA                     |
| V  | 11,105,988 | 11,943,816 | 837,828   | + | bma1.assembly.9744.0  | 717       | 7,360     | 6,643   | - | NA                     |
| V  | 19,937,327 | 20,245,848 | 308,521   | + | bma1.assembly.8584.0  | 15,821    | 27,744    | 11,923  | - | NA                     |
| V  | 11,943,816 | 12,647,113 | 703,297   | + | bma1.assembly.9648.0  | 29,562    | 77,426    | 47,864  | + | NA                     |
| X  | 2,591,517  | 3,485,878  | 894,361   | + | bma1.assembly.8833.0  | 22,613    | 178,244   | 155,631 | - | SUPERLINK_TRISPI_SCTG7 |
| X  | 8,307,397  | 10,998,987 | 2,691,590 | + | bma1.assembly.9572.0  | 4,994,848 | 5,715,336 | 720,488 | - | SUPERLINK_TRISPI_SCTG3 |
|    |            |            | 3,585,951 |   |                       |           |           | 876,119 |   |                        |
| X  | 15,063,332 | 15,750,959 | 687,627   | + | bma1.assembly.8408.0  | 17,872    | 29,164    | 11,292  | - | NA                     |
| X  | 10,998,987 | 14,497,650 | 3,498,663 | + | bma1.assembly.9533.0  | 829,410   | 1,279,534 | 450,124 | - | NA                     |
| X  | 15,750,959 | 16,147,850 | 396,891   | + | bma1.assembly.9572.0  | 5,715,336 | 6,156,543 | 441,207 | - | NA                     |
| X  | 14,712,584 | 15,063,332 | 350,748   | + | bma1.assembly.6757.0  | 506       | 8,305     | 7,799   | - | NA                     |
| X  | 14,497,650 | 14,712,584 | 214,934   | + | bma1.assembly.9572.0  | 4,055,679 | 4,222,832 | 167,153 | + | NA                     |
| X  | 7,880,441  | 8,307,397  | 426,956   | + | bma1.assembly.9533.0  | 817,021   | 829,410   | 12,389  | - | NA                     |
| X  | 2,442,557  | 2,591,517  | 148,960   | + | bma1.assembly.7867.0  | 139,585   | 151,311   | 11,726  | + | NA                     |
| X  | 2,394,499  | 2,442,557  | 48,058    | + | bma1.assembly.9537.0  | 439,273   | 447,066   | 7,793   | - | NA                     |

|    |           |           |           |    |                       |           |           |         |   |                         |
|----|-----------|-----------|-----------|----|-----------------------|-----------|-----------|---------|---|-------------------------|
| X  | 5,899,841 | 7,880,441 | 1,980,600 | +  | bma1.assembly.9533.0  | 1,279,534 | 1,689,560 | 410,026 | - | NA                      |
| X  | 3,485,878 | 5,899,841 | 2,413,963 | +  | bma1.assembly.9572.0  | 3,756,286 | 3,913,938 | 157,652 | + | NA                      |
| NA | NA        | NA        |           | NA | bma1.assembly.10547.0 | 3,631     | 14,422    | 10,791  | + | SUPERLINK_TRISPI_SCTG45 |
| NA | NA        | NA        |           | NA | bma1.assembly.11742.0 | 0         | 8,306     | 8,306   | + | SUPERLINK_TRISPI_SCTG12 |
| NA | NA        | NA        |           | NA | bma1.assembly.6264.0  | 9,055     | 25,509    | 16,454  | + | SUPERLINK_TRISPI_SCTG10 |
| NA | NA        | NA        |           | NA | bma1.assembly.7787.0  | 10,543    | 25,506    | 14,963  | + | SUPERLINK_TRISPI_SCTG10 |
| NA | NA        | NA        |           | NA | bma1.assembly.7821.0  | 33,176    | 41,134    | 7,958   | + | SUPERLINK_TRISPI_SCTG1  |



**Supplementary Table 8.** *C. elegans* based annotation of the 328 single-copy orthologous groups.

| Orthologous group ID | <i>C. elegans</i> RNAi phenotype                                                                            | Genes in this group                                             |
|----------------------|-------------------------------------------------------------------------------------------------------------|-----------------------------------------------------------------|
| ORTHOMCL2309         |                                                                                                             | 12492.m00173 F21H11.2a FBpp0076146 Minc11585 Tsp_00555 YIL129C  |
| ORTHOMCL2311         | Prl Lvl Unc Adl Gro                                                                                         | 12496.m00293 FBpp0073410 Minc13993 Tsp_00183 Y76A2A.2 YDR270W   |
| ORTHOMCL2314         |                                                                                                             | 12508.m00092 FBpp0071077 Minc17248a Tsp_02642 YML059C ZK370.4b  |
| ORTHOMCL2318         | WT                                                                                                          | 12565.m00052 C52E12.1 FBpp0072214 Minc04726 Tsp_05996 YDR266C   |
| ORTHOMCL2319         | Clr Lva Sck Emb Lon Gro                                                                                     | 12568.m00015 F09E5.2 FBpp0072887 Minc11061 Tsp_11653 YGL065C    |
| ORTHOMCL2320         | Bli Ocs Emb Pvl Ste Unc Stp                                                                                 | 12575.m00211 FBpp0079641 Minc17985 T05G5.3 Tsp_11762 YBR160W    |
| ORTHOMCL2321         | Emb                                                                                                         | 12575.m00213 FBpp0070317 Minc02178 Tsp_02600 W02B12.10 YDL201W  |
| ORTHOMCL2324         |                                                                                                             | 12598.m00175 FBpp0079628 Minc01093 Tsp_02039 Y51H7C.6a YPR105C  |
| ORTHOMCL2326         | WT                                                                                                          | 12616.m00132 FBpp0077419 Minc15908 T03F1.3 Tsp_04645 YCR012W    |
| ORTHOMCL2330         | Lva Pch Emb                                                                                                 | 12724.m00019 C30B5.4 FBpp0080829 Minc10250 Tsp_08389 YIR005W    |
| ORTHOMCL2332         |                                                                                                             | 12737.m00157 FBpp0086845 Minc09159 T04A8.7a Tsp_10647 YEL011W   |
| ORTHOMCL2333         | fat_content_reduced                                                                                         | 12778.m00055 FBpp0079575 Minc07331 Tsp_04516 Y50D7A.9 YGR021W   |
| ORTHOMCL2341         | early_larval_arrest                                                                                         | 12903.m00106 C16C10.8 FBpp0087437 Minc06710 Tsp_02224 YCR087C-A |
| ORTHOMCL2345         | Ced<br>Lva Bli Prl Emb Lvl                                                                                  | 12971.m00013 C41D11.8 FBpp0087120 Minc17633 Tsp_09257 YJL208C   |
| ORTHOMCL2346         | transgene_subcellular_localization_abnormal                                                                 | 13001.m00046 FBpp0080495 Minc16482a T14F9.1 Tsp_02924 YPR036W   |
| ORTHOMCL2351         | Lva Emb                                                                                                     | 13073.m00116 FBpp0074075 Minc01303 Tsp_07802 Y37E3.10 YJR007W   |
| ORTHOMCL2352         | Emb                                                                                                         | 13073.m00117 FBpp0080708 Minc08978a Tsp_08590 Y37E3.9 YGR132C   |
| ORTHOMCL2353         |                                                                                                             | 13073.m00118 FBpp0077142 Minc08977 Tsp_02079 Y37E3.8a YGL103W   |
| ORTHOMCL2360         | Emb                                                                                                         | 13154.m00136 FBpp0079294 Minc16258 T22C1.3 Tsp_05206 YLR459W    |
| ORTHOMCL2371         | Emb Lvl Ste Unc Gro                                                                                         | 13227.m00137 FBpp0072693 Minc03403 Tsp_10268 Y71F9AL.17 YDL145C |
| ORTHOMCL2376         | WT                                                                                                          | 13249.m00079 F40F4.7 FBpp0087227 Minc04692 Tsp_01637 YOR253W    |
| ORTHOMCL2383         |                                                                                                             | 13260.m00100 FBpp0086973 Minc11005 Tsp_00702 Y65B4BR.5b YHR193C |
| ORTHOMCL2385         | Dpy Bmd Slu Pvl Unc Gro<br>failure_to_hatch                                                                 | 13261.m00259 C08H9.2 FBpp0089202 Minc01407 Tsp_10795 YJL080C    |
| ORTHOMCL2389         | nuclear_appearance_abnormal Emb<br>Mul<br>Lva<br>spontaneous_mutation_rate_increased                        | 13276.m00051 F10C2.4 FBpp0075277 Minc14417 Tsp_06599 YDL102W    |
| ORTHOMCL2391         | Emb Gro                                                                                                     | 13293.m00126 C54G10.2 FBpp0099511 Minc03446 Tsp_06737 YOR217W   |
| ORTHOMCL2392         |                                                                                                             | 13294.m00107 F43D9.3a FBpp0089084 Minc14003 Tsp_07033 YDR189W   |
| ORTHOMCL2393         | Let Clr Prl Ric Unc Gro                                                                                     | 13298.m00052 FBpp0088945 Minc15811a T20B5.1 Tsp_06362 YBL037W   |
| ORTHOMCL2402         | Clr thin Emb Stp Gro<br>Cyk<br>Lva<br>distal_tip_cell_migration_abnormal<br>chromosome_segregation_abnormal | 13325.m00226 FBpp0072117 Minc00301 T06D8.5 Tsp_08197 YER141W    |
| ORTHOMCL2404         | Emb Pvl Mul                                                                                                 | 13345.m00128 F35G12.8 FBpp0080489 Minc15914a Tsp_07237 YLR086W  |
| ORTHOMCL2409         | WT                                                                                                          | 13355.m00154 F36D4.2 FBpp0079332 Minc16750 Tsp_04134 YDR246W    |
| ORTHOMCL2410         |                                                                                                             | 13356.m00240 C37C3.8b FBpp0082187 Minc12175 Tsp_08382 YJR008W   |
| ORTHOMCL2420         | WT                                                                                                          | 13401.m00093 C04G6.3 FBpp0112984 Minc16940 Tsp_10708 YKR031C    |
| ORTHOMCL2423         | WT                                                                                                          | 13411.m00123 B0035.16 FBpp0070168 Minc06524a Tsp_04039 YDL033C  |
| ORTHOMCL2425         | Emb                                                                                                         | 13415.m00444 C09G12.9 FBpp0075088 Minc17375 Tsp_03768 YCL008C   |
| ORTHOMCL2426         | WT                                                                                                          | 13415.m00454 FBpp0080827 Minc17878 Tsp_06063 W10D9.4 YBL021C    |
| ORTHOMCL2433         | WT                                                                                                          | 13480.m00173 C14A4.3 FBpp0084183 Minc16180 Tsp_09458 YNL219C    |
| ORTHOMCL2435         | Lva Emb Stp                                                                                                 | 13486.m00112 F54A3.3 FBpp0082788 Minc14304a Tsp_09755 YJL014W   |
| ORTHOMCL2436         |                                                                                                             | 13499.m00137 F59A2.1b FBpp0084188 Minc16751a Tsp_00378 YDR002W  |
| ORTHOMCL2448         | WT                                                                                                          | 13586.m00156 B0334.4 FBpp0087591 Minc17976 Tsp_07093 YLR193C    |
| ORTHOMCL2454         | Emb Mei Ste                                                                                                 | 13644.m00291 FBpp0073893 Minc15359 Tsp_11031 W10C6.1 YNL172W    |
| ORTHOMCL2455         | WT                                                                                                          | 13658.m00036 F08F8.7 FBpp0088028 Minc11587 Tsp_12251 YJL121C    |
| ORTHOMCL2456         | Lva Emb Ste Stp                                                                                             | 13662.m00127 FBpp0089163 Minc17194 Tsp_05366 Y76B12C.7 YDR301W  |
| ORTHOMCL2458         | Emb Pvl Ste Mul<br>Ocs Emb Lvl Ste                                                                          | 13674.m00035 C25D7.6 FBpp0070729 Minc19113 Tsp_04051 YEL032W    |
| ORTHOMCL2466         | transgene_subcellular_localization_abnormal                                                                 | 13736.m00400 F56H1.4 FBpp0083843 Minc14887a Tsp_07392 YOR117W   |

|              |                                                                                                                                            |                                                                  |
|--------------|--------------------------------------------------------------------------------------------------------------------------------------------|------------------------------------------------------------------|
| ORTHOMCL2467 |                                                                                                                                            | 13736.m00405 FBpp0082816 Minc11069 R06C7.5a Tsp_06112 YLR359W    |
|              | Dpy small Emb Pvl Ste Lva<br>transgene_expression_increased<br>transgene_subcellular_localization_ab<br>normal Stp                         |                                                                  |
| ORTHOMCL2470 |                                                                                                                                            | 13780.m00058 FBpp0075700 K04G2.1 Minc07301 Tsp_05772 YPL237W     |
| ORTHOMCL2472 | WT                                                                                                                                         | 13786.m00077 FBpp0085393 Minc03680 Tsp_03383 Y67H2A.7 YKL134C    |
| ORTHOMCL2474 | WT                                                                                                                                         | 13792.m00111 FBpp0080148 Minc11668 Tsp_05486 Y57A10A.15 YOR330C  |
|              | Emb Lvl Ste<br>embryonic_terminal_arrest_variable_e<br>mb unclassified                                                                     |                                                                  |
| ORTHOMCL2475 |                                                                                                                                            | 13818.m00236 F46F11.5 FBpp0083214 Minc16114 Tsp_10702 YHR039C-A  |
| ORTHOMCL2478 | Emb Ste Lva Gro                                                                                                                            | 13818.m00242 F58B3.5 FBpp0085809 Minc16706 Tsp_00605 YGR264C     |
| ORTHOMCL2480 |                                                                                                                                            | 13824.m00056 C03D6.3a FBpp0073739 Minc13946 Tsp_02609 YGL130W    |
| ORTHOMCL2482 | WT                                                                                                                                         | 13834.m00091 C28G1.3 FBpp0083436 Minc14675 Tsp_03288 YGL233W     |
| ORTHOMCL2483 |                                                                                                                                            | 13842.m00014 F48F5.5 FBpp0076791 Minc11588 Tsp_08637 YMR274C     |
| ORTHOMCL2485 | WT                                                                                                                                         | 13847.m00043 F10E7.5 FBpp0087511 Minc16058 Tsp_13341 YKL009W     |
| ORTHOMCL2487 | WT                                                                                                                                         | 13889.m00011 F32H2.4 FBpp0081350 Minc08958 Tsp_00088 YNL253W     |
| ORTHOMCL2488 | WT                                                                                                                                         | 13906.m00035 FBpp0076827 Minc03753 Tsp_10838 W08E12.7 YDR101C    |
| ORTHOMCL2491 |                                                                                                                                            | 13924.m00036 F28B12.2a FBpp0111738 Minc08587 Tsp_09605 YBR083W   |
| ORTHOMCL2493 | WT                                                                                                                                         | 13943.m00028 F07A11.3 FBpp0079710 Minc16624 Tsp_10556 YDL116W    |
| ORTHOMCL2497 | WT                                                                                                                                         | 13970.m00032 F13B12.1 FBpp0111905 Minc04974 Tsp_06200 YPR133C    |
| ORTHOMCL2500 |                                                                                                                                            | 13985.m00052 FBpp0084907 Minc16467 Tsp_07528 Y69A2AR.18b YBR039W |
|              | Dpy Age Emb Pvl Ste Unc<br>embryonic_terminal_arrest_variable_e<br>mb transposon_silencing_abnormal<br>Gro                                 |                                                                  |
| ORTHOMCL2502 |                                                                                                                                            | 13994.m00022 F43G9.1 FBpp0074550 Minc15213 Tsp_10049 YOR136W     |
| ORTHOMCL2506 | Emb Cyk Mul Stp Gro                                                                                                                        | 14037.m00192 F31E3.3 FBpp0074246 Minc04219 Tsp_04544 YJR068W     |
| ORTHOMCL2507 | WT                                                                                                                                         | 14038.m00032 FBpp0087958 Minc05871 Tsp_03561 Y71G12B.24 YHR024C  |
| ORTHOMCL2509 |                                                                                                                                            | 14040.m00262 F27D4.4a FBpp0087806 Minc08580 Tsp_05049 YOR091W    |
| ORTHOMCL2511 | Emb                                                                                                                                        | 14052.m00195 FBpp0070723 Minc08973 Tsp_00314 Y39G10AL.3 YDL108W  |
| ORTHOMCL2513 | Emb                                                                                                                                        | 14058.m00556 F36F2.6 FBpp0072249 Minc11167 Tsp_10222 YMR277W     |
|              | Emb late_larval_arrest Lva sterile_F1<br>reduced_brood_size                                                                                |                                                                  |
| ORTHOMCL2515 |                                                                                                                                            | 14058.m00577 FBpp0074227 Minc14187 Tsp_07169 Y23H5B.6 YJL033W    |
| ORTHOMCL2518 | WT                                                                                                                                         | 14077.m00081 FBpp0111804 Minc14479 Tsp_11836 Y71A12B.4 YMR068W   |
| ORTHOMCL2528 | WT                                                                                                                                         | 14134.m00016 FBpp0084843 Minc08927 Tsp_08308 W07G4.3 YOR112W     |
| ORTHOMCL2531 | WT                                                                                                                                         | 14170.m00174 C24H11.6 FBpp0073876 Minc12333 Tsp_00798 YMR150C    |
| ORTHOMCL2534 | WT                                                                                                                                         | 14208.m00920 FBpp0077576 Minc16977 T09F3.2 Tsp_10570 YBR192W     |
| ORTHOMCL2538 | WT                                                                                                                                         | 14224.m00314 FBpp0081606 Minc05175 Tsp_03046 Y39B6A.2 YGR123C    |
| ORTHOMCL2539 | WT                                                                                                                                         | 14230.m00217 FBpp0076247 Minc10492 Tsp_04600 Y39A1C.2 YGL141W    |
| ORTHOMCL2540 | Emb Unc Ste Lva reduced_brood_size<br>Emb Ste Lva<br>transgene_expression_increased<br>transgene_subcellular_localization_ab<br>normal Stp | 14230.m00219 FBpp0079182 Minc00813 Tsp_04321 Y49E10.15 YOR159C   |
| ORTHOMCL2541 |                                                                                                                                            | 14237.m00397 F22B5.9 FBpp0084021 Minc11060 Tsp_09583 YLR060W     |
|              | Pch late_larval_arrest Lva<br>reduced_brood_size Gro                                                                                       |                                                                  |
| ORTHOMCL2543 |                                                                                                                                            | 14237.m00402 FBpp0077735 Minc09546a Tsp_06445 W07E6.2 YCR072C    |
| ORTHOMCL2545 | Emb                                                                                                                                        | 14237.m00409 FBpp0076418 Minc09541a Tsp_06824 Y17G7B.4 YHR068W   |
| ORTHOMCL2546 | WT                                                                                                                                         | 14239.m00344 FBpp0079949 Minc12214 Tsp_02445 YDR120C ZC376.5     |
| ORTHOMCL2547 | WT                                                                                                                                         | 14241.m00049 FBpp0081004 Minc12073 Tsp_13222 Y47D3A.28 YIL150C   |
| ORTHOMCL2548 |                                                                                                                                            | 14246.m00080 FBpp0071302 Minc18537 T02G5.9b Tsp_06904 YDR037W    |
| ORTHOMCL2549 | Dpy Emb Unc Bmd Lva Stp Gro                                                                                                                | 14246.m00081 C27F2.10 FBpp0075833 Minc16293 Tsp_07191 YJR084W    |
| ORTHOMCL2555 |                                                                                                                                            | 14262.m00042 FBpp0087645 H20J04.4b Minc14482 Tsp_01918 YHR169W   |
| ORTHOMCL2561 | Lvl Ste<br>Pch Emb Ste Rup Bmd Lva<br>transgene_expression_increased<br>transgene_subcellular_localization_ab<br>normal Stp                | 14317.m00276 F21D5.7 FBpp0076872 Minc18122 Tsp_07809 YPR088C     |
| ORTHOMCL2562 |                                                                                                                                            | 14324.m00042 FBpp0079992 K01C8.10 Minc00918 Tsp_08448 YDL143W    |
| ORTHOMCL2564 | Emb Lvl Lva early_larval_arrest Gro                                                                                                        | 14330.m00199 FBpp0078633 H43I07.2 Minc13966a Tsp_06988 YPR110C   |
| ORTHOMCL2565 | WT                                                                                                                                         | 14330.m00201 FBpp0079234 H43I07.3 Minc13965 Tsp_09221 YPL227C    |
| ORTHOMCL2566 | WT                                                                                                                                         | 14336.m00025 FBpp0079597 Minc01734 Tsp_06532 Y57G11C.34 YJR113C  |

|              |                                                                                                                                                                        |              |             |             |           |             |          |
|--------------|------------------------------------------------------------------------------------------------------------------------------------------------------------------------|--------------|-------------|-------------|-----------|-------------|----------|
| ORTHOMCL2567 | WT                                                                                                                                                                     | 14347.m00047 | FBpp0076607 | H06I04.2    | Minc15100 | Tsp_05828   | YGR112W  |
| ORTHOMCL2568 |                                                                                                                                                                        | 14348.m00099 | C08F8.2a    | FBpp0078544 | Minc00373 | Tsp_02850   | YPL029W  |
| ORTHOMCL2578 | Emb Ste                                                                                                                                                                | 14372.m00207 | F28C6.6     | FBpp0112455 | Minc08155 | Tsp_09513   | YMR061W  |
| ORTHOMCL2582 | Emb                                                                                                                                                                    | 14387.m00338 | F28B3.1     | FBpp0072420 | Minc01228 | Tsp_08740   | YOR093C  |
| ORTHOMCL2584 | Emb Ste Lva reduced_brood_size                                                                                                                                         | 14389.m00197 | C16A3.9     | FBpp0099990 | Minc02205 | Tsp_02639   | YDR064W  |
| ORTHOMCL2585 |                                                                                                                                                                        | 14389.m00203 | FBpp0075680 | Minc13389   | Tsp_01793 | YNL243W     | ZK370.3a |
| ORTHOMCL2586 | WT                                                                                                                                                                     | 14393.m00059 | FBpp0112564 | Minc00320   | Tsp_00542 | Y54G11A.11  | YKL160W  |
| ORTHOMCL2587 | Emb                                                                                                                                                                    | 14393.m00060 | FBpp0071526 | Minc14052   | R06A4.8   | Tsp_07883   | YPR184W  |
|              | Emb Pvl Ste Sck<br>transgene_expression_increased<br>transgene_subcellular_localization_ab<br>normal                                                                   |              |             |             |           |             |          |
| ORTHOMCL2591 |                                                                                                                                                                        | 14424.m00385 | FBpp0072494 | K02F2.3     | Minc17259 | Tsp_05143   | YML049C  |
| ORTHOMCL2592 | cell_stress_response_abnormal                                                                                                                                          | 14424.m00394 | FBpp0077357 | Minc04216   | Tsp_09697 | W06D4.6     | YGL163C  |
| ORTHOMCL2593 | WT                                                                                                                                                                     | 14437.m00024 | FBpp0081434 | Minc17870   | T07A5.2   | Tsp_04856   | YKR030W  |
| ORTHOMCL2594 | Emb Unc Bmd Lva Stp Gro                                                                                                                                                | 14442.m00128 | FBpp0083861 | Minc11070   | T06D8.8   | Tsp_00727   | YDR427W  |
| ORTHOMCL2597 |                                                                                                                                                                        | 14469.m00103 | FBpp0086063 | Minc16881   | T19A6.2a  | Tsp_11679   | YNR053C  |
| ORTHOMCL2599 | spontaneous_mutation_rate_increased                                                                                                                                    | 14479.m00131 | FBpp0087867 | Minc01921   | T28A8.7   | Tsp_09579   | YMR167W  |
| ORTHOMCL2607 |                                                                                                                                                                        | 14529.m00214 | C10C5.6b    | FBpp0070850 | Minc14103 | Tsp_04303   | YHR186C  |
| ORTHOMCL2609 | Emb                                                                                                                                                                    | 14538.m00478 | FBpp0075982 | Minc11797   | Tsp_07390 | Y66D12A.15  | YIL143C  |
| ORTHOMCL2610 | Emb Unc Lva Gro                                                                                                                                                        | 14540.m00056 | C36B1.3     | FBpp0080121 | Minc08381 | Tsp_09380   | YIL021W  |
| ORTHOMCL2612 | Emb Lva                                                                                                                                                                | 14546.m00096 | B0464.2     | FBpp0072562 | Minc15997 | Tsp_02172   | YOL145C  |
| ORTHOMCL2613 | thin Emb Lon Unc Gro<br>distal_tip_cell_migration_abnormal<br>Emb Pvl Ste Bmd<br>transgene_expression_increased Stp<br>transgene_subcellular_localization_ab<br>normal | 14554.m00235 | FBpp0074237 | Minc02899   | T12D8.7   | Tsp_01650   | YMR236W  |
| ORTHOMCL2615 |                                                                                                                                                                        | 14563.m00108 | FBpp0078400 | Minc17075   | T13H5.4   | Tsp_00418   | YDL030W  |
| ORTHOMCL2616 |                                                                                                                                                                        | 14563.m00109 | C05C10.6b   | FBpp0077645 | Minc13225 | Tsp_00624   | YKL213C  |
|              | small Emb Pvl Unc<br>reduced_brood_size Gro                                                                                                                            |              |             |             |           |             |          |
| ORTHOMCL2617 |                                                                                                                                                                        | 14567.m00026 | D2021.1     | FBpp0079664 | Minc02745 | Tsp_03329   | YBR112C  |
| ORTHOMCL2618 |                                                                                                                                                                        | 14569.m00222 | F20B6.8b    | FBpp0072450 | Minc07852 | Tsp_07484   | YJL141C  |
| ORTHOMCL2619 | Pvl Lvl Ste Lva Gro                                                                                                                                                    | 14575.m00066 | FBpp0079305 | Minc17135   | Tsp_00911 | Y75B8A.7    | YJR002W  |
|              | glp Emb fat_content_reduced Him<br>unclassified                                                                                                                        |              |             |             |           |             |          |
| ORTHOMCL2621 |                                                                                                                                                                        | 14589.m00213 | FBpp0079802 | Minc08564   | Tsp_12012 | YMR224C     | ZC302.1  |
| ORTHOMCL2622 | Emb Lva                                                                                                                                                                | 14590.m00348 | FBpp0085724 | Minc04828   | Tsp_10723 | Y82E9BR.15  | YPL046C  |
| ORTHOMCL2624 | Emb Lva Sck                                                                                                                                                            | 14599.m00271 | FBpp0070861 | Minc08980   | T04A8.14  | Tsp_02371   | YGR116W  |
| ORTHOMCL2626 | Dpy Pch Sle Emb Ste Bmd Lva Stp<br>Gro                                                                                                                                 | 14608.m00265 | D2013.5     | FBpp0086700 | Minc07059 | Tsp_02116   | YOR211C  |
| ORTHOMCL2630 | WT                                                                                                                                                                     | 14612.m00129 | C04F12.10   | FBpp0086207 | Minc07573 | Tsp_03936   | YJR117W  |
|              | Emb Lvl Ste<br>spontaneous_mutation_rate_increased<br>Mul<br>transgene_subcellular_localization_ab<br>normal                                                           |              |             |             |           |             |          |
| ORTHOMCL2633 |                                                                                                                                                                        | 14616.m00147 | D1081.8     | FBpp0072468 | Minc05493 | Tsp_07418   | YMR213W  |
| ORTHOMCL2635 | Emb Lvl Ste fat_content_reduced Bmd<br>Sck                                                                                                                             | 14631.m00037 | F20D12.2    | FBpp0074178 | Minc01024 | Tsp_05363   | YDR159W  |
| ORTHOMCL2638 | Emb reduced_brood_size                                                                                                                                                 | 14634.m00550 | F35F11.1    | FBpp0081448 | Minc10352 | Tsp_04052   | YLR418C  |
| ORTHOMCL2640 | Clr Emb Lvl Unc Rup Lva Ced Gro                                                                                                                                        | 14643.m00078 | FBpp0078483 | M57.2       | Minc09555 | Tsp_09299   | YJL031C  |
| ORTHOMCL2642 |                                                                                                                                                                        | 14648.m00054 | FBpp0076451 | Minc11460   | T17E9.2b  | Tsp_00547   | YLR195C  |
| ORTHOMCL2647 | thin Emb Unc Stp Gro                                                                                                                                                   | 14659.m00191 | C55B7.8     | FBpp0076409 | Minc09985 | Tsp_09915   | YKL149C  |
|              | Egl Emb Lvl Unc Rup<br>cell_division_abnormal Vul Mul                                                                                                                  |              |             |             |           |             |          |
| ORTHOMCL2650 |                                                                                                                                                                        | 14673.m00023 | F26E4.1     | FBpp0081665 | Minc02539 | Tsp_07431   | YGL190C  |
| ORTHOMCL2654 | Age Emb                                                                                                                                                                | 14686.m00197 | FBpp0085326 | K07H8.1     | Minc14656 | Tsp_02571   | YER007W  |
| ORTHOMCL2655 |                                                                                                                                                                        | 14687.m00366 | F33H1.1b    | FBpp0111808 | Minc08233 | Tsp_07936   | YLR176C  |
| ORTHOMCL2660 | WT                                                                                                                                                                     | 14704.m00450 | D2023.6     | FBpp0072227 | Minc11994 | Tsp_03160   | YLR253W  |
|              | small Emb Unc Ste Lva Sck<br>transgene_subcellular_localization_ab<br>normal Gro                                                                                       |              |             |             |           |             |          |
| ORTHOMCL2662 |                                                                                                                                                                        | 14704.m00456 | FBpp0079951 | H19N07.1    | Minc16006 | Tsp_08936   | YDR172W  |
| ORTHOMCL2664 |                                                                                                                                                                        | 14712.m00227 | FBpp0085627 | K07A1.9a    | Minc05028 | Tsp_00010   | YGL017W  |
| ORTHOMCL2665 |                                                                                                                                                                        | 14713.m00192 | FBpp0077654 | Minc03015   | Tsp_06428 | Y105E8A.23b | YFL036W  |
| ORTHOMCL2666 | Emb unclassified Mul                                                                                                                                                   | 14713.m00193 | FBpp0081756 | Minc09242   | R10E4.4   | Tsp_07749   | YLR274W  |

|              |                                                                                                                                                                                                  |                                                                 |
|--------------|--------------------------------------------------------------------------------------------------------------------------------------------------------------------------------------------------|-----------------------------------------------------------------|
| ORTHOMCL2667 |                                                                                                                                                                                                  | 14715.m01236 FBpp0079278 Minc13151 Tsp_03075 YGR218W ZK742.1a   |
| ORTHOMCL2671 | Egl Emb Pvl Unc Rup Bmd                                                                                                                                                                          | 14719.m00183 FBpp0077106 Minc14874 R02D3.5 Tsp_01343 YKL019W    |
| ORTHOMCL2677 | Dpy Emb Pvl Lvl Ste Lva Stp Gro<br>Emb Lvl Ste Bmd Lva<br>transgene_expression_increased<br>reduced_brood_size Gro                                                                               | 14744.m00190 FBpp0080997 Minc17447 T26G10.1 Tsp_02129 YHR065C   |
| ORTHOMCL2678 |                                                                                                                                                                                                  | 14749.m00216 FBpp0077251 Minc12165 R74.1 Tsp_00765 YPL160W      |
| ORTHOMCL2683 | late_larval_arrest Lva Stp                                                                                                                                                                       | 14763.m00261 F45E12.2 FBpp0082893 Minc07241 Tsp_00909 YGR246C   |
| ORTHOMCL2686 | Sle Emb oogenesis_abnormal Lva<br>reduced_brood_size                                                                                                                                             | 14765.m00816 C08B6.9 FBpp0082065 Minc07033 Tsp_00060 YPR180W    |
| ORTHOMCL2687 | WT                                                                                                                                                                                               | 14768.m00188 FBpp0079711 Minc01163 Tsp_06818 Y62E10A.10 YKL207W |
| ORTHOMCL2694 | WT<br>Emb<br>transgene_subcellular_localization_ab<br>normal                                                                                                                                     | 14773.m00915 F46C5.8 FBpp0084189 Minc08793 Tsp_09092 YCL001W    |
| ORTHOMCL2696 | Emb Lvl Ric Unc Lva<br>transgene_subcellular_localization_ab<br>normal Gro                                                                                                                       | 14775.m00061 F55A3.3 FBpp0072743 Minc13731a Tsp_05443 YGL207W   |
| ORTHOMCL2698 |                                                                                                                                                                                                  | 14776.m00033 F23C8.6 FBpp0074859 Minc02714 Tsp_11192 YKR035W-A  |
| ORTHOMCL2700 | WT                                                                                                                                                                                               | 14788.m00090 F46F6.2 FBpp0111810 Minc12074 Tsp_04112 YBL105C    |
| ORTHOMCL2702 | Emb Lva reduced_brood_size                                                                                                                                                                       | 14794.m00099 FBpp0074906 LLC1.3 Minc06711 Tsp_03154 YFL018C     |
| ORTHOMCL2704 | WT                                                                                                                                                                                               | 14819.m00068 FBpp0082110 Minc17002 Tsp_10246 W06D4.5 YOR357C    |
| ORTHOMCL2707 |                                                                                                                                                                                                  | 14855.m00193 C29A12.3a FBpp0072041 Minc02244 Tsp_04168 YDL164C  |
| ORTHOMCL2709 | Age                                                                                                                                                                                              | 14857.m00322 C54G4.6 FBpp0079391 Minc12738 Tsp_11052 YOR111W    |
| ORTHOMCL2710 | distal_tip_cell_migration_abnormal<br>Emb Pvl Lva reduced_brood_size                                                                                                                             | 14873.m00236 F26F4.11 FBpp0078086 Minc05981 Tsp_00326 YOR224C   |
| ORTHOMCL2712 | WT<br>small Emb Lvl Ste                                                                                                                                                                          | 14896.m00034 FBpp0071982 Minc13730 T23D8.8 Tsp_05684 YMR176W    |
| ORTHOMCL2718 | embryonic_terminal_arrest_variable_e<br>mb Lva<br>distal_tip_cell_migration_abnormal<br>Emb Pvl Ste Unc Lva Pna Sck<br>reduced_brood_size<br>transgene_subcellular_localization_ab<br>normal Gro | 14916.m00491 FBpp0083371 Minc11713 Tsp_03116 Y105E8A.16 YHL015W |
| ORTHOMCL2719 |                                                                                                                                                                                                  | 14916.m00497 FBpp0080484 Minc06523 Tsp_08627 Y48G1A.5 YGL238W   |
| ORTHOMCL2726 | Clr Emb Lvl Ste Unc Lva Sck                                                                                                                                                                      | 14922.m00062 F55A11.2 FBpp0080390 Minc13657 Tsp_03009 YLR026C   |
| ORTHOMCL2727 |                                                                                                                                                                                                  | 14923.m00297 FBpp0084955 Minc05268 Tsp_02540 Y43C5A.6a YER095W  |
| ORTHOMCL2731 | Clr Emb Lon early_larval_arrest Gro                                                                                                                                                              | 14929.m00395 FBpp0073806 Minc02945 Tsp_00437 Y49E10.2 YPL059W   |
| ORTHOMCL2734 | thin Emb Gro                                                                                                                                                                                     | 14930.m00335 F43G9.3 FBpp0088485 Minc15217 Tsp_10011 YHR002W    |
| ORTHOMCL2736 | Ste Lva                                                                                                                                                                                          | 14930.m00349 FBpp0084959 Minc01679 T24B8.1 Tsp_09338 YBL092W    |
| ORTHOMCL2737 |                                                                                                                                                                                                  | 14931.m00314 C23H3.4a FBpp0086842 Minc05450 Tsp_08839 YMR296C   |
| ORTHOMCL2740 | Emb Lvl Ste Lva<br>transgene_subcellular_localization_ab<br>normal<br>distal_tip_cell_migration_abnormal Pch<br>Sle Emb Lon Ste Lva                                                              | 14933.m00221 D1054.15 FBpp0073459 Minc06925 Tsp_06269 YPL151C   |
| ORTHOMCL2750 | early_larval_arrest Stp Gro                                                                                                                                                                      | 14943.m00197 FBpp0087045 Minc10930 Tsp_05558 W07E6.1 YNL061W    |
| ORTHOMCL2752 |                                                                                                                                                                                                  | 14946.m00538 FBpp0074691 Minc04376a R11G1.4a Tsp_06293 YNL161W  |
| ORTHOMCL2754 | Emb Lvl Ste Unc Bmd Gro                                                                                                                                                                          | 14950.m01850 FBpp0078205 Minc07625 T16H12.4 Tsp_04726 YLR005W   |
| ORTHOMCL2756 | Emb                                                                                                                                                                                              | 14950.m01860 FBpp0080890 Minc03454 Tsp_00175 Y6D11A.2 YNR035C   |
| ORTHOMCL2761 |                                                                                                                                                                                                  | 14952.m01380 FBpp0080114 Minc02769 Tsp_09497 Y6B3A.1a YDR170C   |
| ORTHOMCL2781 | Emb Ste Lva<br>transgene_subcellular_localization_ab<br>normal                                                                                                                                   | 14955.m00257 F25H2.10 FBpp0078134 Minc02151 Tsp_06972 YLR340W   |
| ORTHOMCL2783 |                                                                                                                                                                                                  | 14956.m00503 FBpp0077424 Minc15982 T12E12.4b Tsp_06787 YLL001W  |
| ORTHOMCL2784 | WT                                                                                                                                                                                               | 14956.m00507 FBpp0085657 Minc08367 T05E11.4 Tsp_10437 YHL022C   |
| ORTHOMCL2786 | WT                                                                                                                                                                                               | 14956.m00534 FBpp0072481 Minc07771 Tsp_10889 Y54G2A.18 YDL072C  |
| ORTHOMCL2791 | WT                                                                                                                                                                                               | 14958.m00349 F17E5.2 FBpp0075714 Minc15201 Tsp_03773 YNL083W    |
| ORTHOMCL2799 | WT                                                                                                                                                                                               | 14961.m04940 C52D10.12 FBpp0112509 Minc11072 Tsp_07063 YOL060C  |
| ORTHOMCL2805 | WT                                                                                                                                                                                               | 14961.m05002 C01G5.6 FBpp0074054 Minc05030 Tsp_05024 YER143W    |
| ORTHOMCL2806 | WT                                                                                                                                                                                               | 14961.m05031 B0285.4 FBpp0080320 Minc12793 Tsp_08223 YDR435C    |
| ORTHOMCL2807 |                                                                                                                                                                                                  | 14961.m05052 C44C1.4a FBpp0081548 Minc06525 Tsp_08612 YGL095C   |
| ORTHOMCL2812 | Emb Ste Lva                                                                                                                                                                                      | 14961.m05136 FBpp0080723 Minc04840 Tsp_03388 Y106G6H.3 YGL030W  |

|              |                                                                                                                                                               |                                                                  |
|--------------|---------------------------------------------------------------------------------------------------------------------------------------------------------------|------------------------------------------------------------------|
| ORTHOMCL2819 | Emb Bmd                                                                                                                                                       | 14961.m05187 FBpp0077363 Minc08957 Tsp_03568 Y110A7A.4 YOR074C   |
| ORTHOMCL2824 | late_larval_arrest<br>Emb Lvl Ste Cyk Lva Mul<br>transgene_subcellular_localization_ab<br>normal Gro                                                          | 14961.m05276 FBpp0072020 Minc13544 Tsp_06741 Y73B6BL.3 YHR069C   |
| ORTHOMCL2827 |                                                                                                                                                               | 14961.m05290 C50F2.3 FBpp0086749 Minc14510 Tsp_03302 YDR416W     |
| ORTHOMCL2831 |                                                                                                                                                               | 14963.m01769 F46B6.6a FBpp0084662 Minc07199 Tsp_07892 YOL023W    |
| ORTHOMCL2834 | Emb Lva                                                                                                                                                       | 14963.m01791 FBpp0083105 Minc12411 Tsp_06065 Y67H2A.1 YLR277C    |
| ORTHOMCL2835 |                                                                                                                                                               | 14963.m01815 F32D8.14 FBpp0080011 Minc10490 Tsp_06588 YGR172C    |
| ORTHOMCL2837 |                                                                                                                                                               | 14965.m00422 C38C10.5b FBpp0072453 Minc03690 Tsp_03799 YLR071C   |
| ORTHOMCL2838 | Emb Pvl Ste Cyk Lva Sck<br>transgene_expression_increased Stp<br>Gro Mul                                                                                      | 14965.m00425 FBpp0074756 Minc12788 T22D1.10 Tsp_01893 YPL235W    |
| ORTHOMCL2843 | Emb Ste Cyk Mul                                                                                                                                               | 14968.m01448 FBpp0085619 Minc11093 Tsp_05750 W03D2.4 YBR088C     |
| ORTHOMCL2844 | Unc Lva Gro                                                                                                                                                   | 14968.m01475 FBpp0078362 Minc10954 R06A4.9 Tsp_10488 YNL317W     |
| ORTHOMCL2845 | Emb Unc                                                                                                                                                       | 14968.m01479 F11H8.1 FBpp0086711 Minc05186 Tsp_09278 YPR066W     |
| ORTHOMCL2846 | WT                                                                                                                                                            | 14968.m01493 F45H10.1 FBpp0100026 Minc11518 Tsp_07602 YBR006W    |
| ORTHOMCL2848 |                                                                                                                                                               | 14971.m02793 FBpp0076600 Minc14752 Tsp_10065 Y110A7A.17a YBL084C |
| ORTHOMCL2849 | WT                                                                                                                                                            | 14971.m02795 FBpp0082457 Minc00590 Tsp_10027 Y71F9B.2 YGR046W    |
| ORTHOMCL2855 | Pch Emb Pvl Ste Lva Sck Gro                                                                                                                                   | 14971.m02877 FBpp0088519 Minc04224 Tsp_07475 Y48B6A.1 YMR049C    |
| ORTHOMCL2856 | WT                                                                                                                                                            | 14971.m02879 FBpp0081368 Minc04225 T03F1.12 Tsp_03394 YJL004C    |
| ORTHOMCL2863 | Rup                                                                                                                                                           | 14972.m07020 FBpp0088843 Minc00816 T07A9.6 Tsp_07635 YNL128W     |
| ORTHOMCL2864 | WT                                                                                                                                                            | 14972.m07024 FBpp0083416 Minc00315 Tsp_01354 YNL168C ZK688.3     |
| ORTHOMCL2867 | Clr Emb pale Gro                                                                                                                                              | 14972.m07042 B0035.5 FBpp0074517 Minc03039 Tsp_02567 YNL241C     |
| ORTHOMCL2868 | WT                                                                                                                                                            | 14972.m07043 B0035.4 FBpp0076858 Minc10439 Tsp_11074 YNL153C     |
| ORTHOMCL2869 | WT                                                                                                                                                            | 14972.m07048 FBpp0086975 Minc09338a Tsp_06712 YPR140W ZK809.2    |
| ORTHOMCL2872 | Ste Lva<br>small Prl Muv<br>intestinal_morphology_abnormal Emb<br>Pvl Ste Unc<br>germ_cell_morphology_abnormal Lva<br>fertility_abnormal unclassified Ced Gro | 14972.m07055 FBpp0089284 Minc01136 Tsp_09334 YPL218W ZK180.4     |
| ORTHOMCL2873 |                                                                                                                                                               | 14972.m07056 FBpp0083975 Minc09035 T19E7.3 Tsp_00471 YPL120W     |
| ORTHOMCL2874 |                                                                                                                                                               | 14972.m07058 FBpp0083801 Minc14657 Tsp_08209 Y77E11A.13a YLR208W |
| ORTHOMCL2876 | WT                                                                                                                                                            | 14972.m07114 FBpp0080854 K07A3.1 Minc04259 Tsp_00778 YLR377C     |
| ORTHOMCL2883 | Emb Lvl Ste Unc Lva Ocs                                                                                                                                       | 14972.m07172 F25H2.9 FBpp0086066 Minc15898 Tsp_05973 YGR253C     |
| ORTHOMCL2885 |                                                                                                                                                               | 14972.m07201 FBpp0083954 Minc12863 Tsp_06709 YAL021C ZC518.3b    |
| ORTHOMCL2886 |                                                                                                                                                               | 14972.m07206 F32B6.8b FBpp0083411 Minc00302 Tsp_06919 YOR070C    |
| ORTHOMCL2893 | Egl Emb Ste Lva early_larval_arrest<br>Stp Gro                                                                                                                | 14972.m07291 F32E10.1 FBpp0080211 Minc08030 Tsp_04317 YGR145W    |
| ORTHOMCL2896 | WT                                                                                                                                                            | 14972.m07317 C33F10.2 FBpp0070698 Minc04220a Tsp_01646 YMR055C   |
| ORTHOMCL2900 | WT                                                                                                                                                            | 14972.m07357 C18B12.6 FBpp0070085 Minc03018 Tsp_11066 YML067C    |
| ORTHOMCL2911 | spontaneous_mutation_rate_increased                                                                                                                           | 14972.m07472 F29C4.6 FBpp0087712 Minc15382 Tsp_06711 YGL211W     |
| ORTHOMCL2913 |                                                                                                                                                               | 14972.m07494 FBpp0083646 Minc15848 R160.1a Tsp_09623 YOL062C     |
| ORTHOMCL2914 |                                                                                                                                                               | 14972.m07496 FBpp0087637 Minc17969 T07A9.9a Tsp_00145 YPL093W    |
| ORTHOMCL2917 |                                                                                                                                                               | 14972.m07515 C27B7.1b FBpp0082521 Minc16586 Tsp_05766 YNL246W    |
| ORTHOMCL2919 |                                                                                                                                                               | 14972.m07521 FBpp0086318 Minc11087 Tsp_09296 Y38F2AL.3a YKL080W  |
| ORTHOMCL2922 | Unc                                                                                                                                                           | 14972.m07554 F46H6.1 FBpp0074665 Minc07867 Tsp_05197 YDL135C     |
| ORTHOMCL2926 | WT                                                                                                                                                            | 14972.m07595 FBpp0070249 Minc09525 Tsp_06067 YDR313C ZK632.12    |
| ORTHOMCL2929 | Pvl                                                                                                                                                           | 14972.m07600 F42G8.6 FBpp0079295 Minc09523 Tsp_04285 YHR111W     |
| ORTHOMCL2933 | fat_content_reduced                                                                                                                                           | 14972.m07651 FBpp0083132 Minc12088 Tsp_08794 Y41D4A.6 YMR293C    |
| ORTHOMCL2934 | WT                                                                                                                                                            | 14972.m07689 FBpp0075151 H21P03.1 Minc15628 Tsp_11560 YOR298C-A  |
| ORTHOMCL2936 |                                                                                                                                                               | 14972.m07699 F44A6.1b FBpp0074937 Minc04257 Tsp_01138 YLR250W    |
| ORTHOMCL2945 |                                                                                                                                                               | 14972.m07767 C10G11.5a FBpp0077845 Minc13899 Tsp_01576 YDR531W   |
| ORTHOMCL2955 | spontaneous_mutation_rate_increased                                                                                                                           | 14972.m07885 FBpp0080203 H26D21.2 Minc15984 Tsp_09659 YOL090W    |
| ORTHOMCL2960 | WT                                                                                                                                                            | 14972.m07948 F39C12.1 FBpp0077507 Minc15225 Tsp_05070 YBL104C    |
| ORTHOMCL2963 | Emb Unc Ste Rup Lva Sck<br>transgene_expression_increased Adl<br>transgene_subcellular_localization_ab<br>normal                                              | 14973.m02632 F57B9.2 FBpp0111584 Minc13530 Tsp_05273 YCR093W     |

|              |                                                                                                                      |                                                                  |
|--------------|----------------------------------------------------------------------------------------------------------------------|------------------------------------------------------------------|
| ORTHOMCL2964 | Emb Lvl Ste Sck Ocs                                                                                                  | 14973.m02646 F49C12.8 FBpp0083687 Minc02773 Tsp_03448 YPR108W    |
| ORTHOMCL2965 |                                                                                                                      | 14973.m02649 FBpp0082504 Minc03831 Tsp_01372 Y54F10AL.1a YBR187W |
| ORTHOMCL2968 | Emb Unc oogenesis_abnormal Lva<br>Gro<br>Clr Emb Pvl Ste<br>transgene_subcellular_localization_ab<br>normal          | 14973.m02695 FBpp0078880 K10D2.6 Minc08943 Tsp_02446 YHR042W     |
| ORTHOMCL2971 |                                                                                                                      | 14973.m02705 C50C3.6 FBpp0087124 Minc14825 Tsp_01598 YHR165C     |
| ORTHOMCL2976 |                                                                                                                      | 14974.m00825 FBpp0073204 Minc09341 Tsp_08736 YLR382C ZK524.3a    |
| ORTHOMCL2977 | Dpy Unc                                                                                                              | 14974.m00828 FBpp0078052 Minc09240 Tsp_11355 Y65B4A.1 YNL286W    |
| ORTHOMCL2978 | WT<br>Emb Ste Unc Lva<br>transgene_subcellular_localization_ab<br>normal Gro                                         | 14974.m00829 FBpp0076826 Minc08389 Tsp_08941 Y65B4A.8 YGR277C    |
| ORTHOMCL2979 |                                                                                                                      | 14974.m00831 F28H1.3 FBpp0089366 Minc09243 Tsp_10224 YOR335C     |
| ORTHOMCL2980 | Emb Pvl Unc Rup Nmo Stp                                                                                              | 14974.m00843 F33H2.5 FBpp0083800 Minc01164 Tsp_07270 YNL262W     |
| ORTHOMCL2984 | WT                                                                                                                   | 14975.m04343 FBpp0080551 Minc16065 Tsp_00413 YDR221W ZK1307.8    |
| ORTHOMCL2985 | Egl early_larval_arrest                                                                                              | 14975.m04348 FBpp0076918 Minc07697 Tsp_05519 YDR496C ZK945.3     |
| ORTHOMCL2988 | WT                                                                                                                   | 14975.m04383 FBpp0077750 Minc14486 T13H5.7 Tsp_01350 YNL072W     |
| ORTHOMCL2990 | Him                                                                                                                  | 14975.m04403 D2085.6 FBpp0086042 Minc11542 Tsp_10141 YPL175W     |
| ORTHOMCL2993 | WT                                                                                                                   | 14975.m04453 C15F1.6 FBpp0073017 Minc16185 Tsp_07269 YDL015C     |
| ORTHOMCL2994 | WT                                                                                                                   | 14975.m04463 FBpp0082929 Minc08799 Tsp_10309 Y110A2AM.3 YER100W  |
| ORTHOMCL3004 | Emb Unc                                                                                                              | 14977.m04860 F59G1.5 FBpp0070363 Minc14380 Tsp_10590 YER075C     |
| ORTHOMCL3007 |                                                                                                                      | 14977.m04879 FBpp0086640 Minc16448 Tsp_06110 Y48E1A.1a YOR341W   |
| ORTHOMCL3009 | Emb Gro                                                                                                              | 14977.m04906 F56D1.3 FBpp0086704 Minc03489 Tsp_04008 YPL013C     |
| ORTHOMCL3010 | Lva early_larval_arrest Gro                                                                                          | 14977.m04928 F44G4.1 FBpp0079946 Minc00314 Tsp_02353 YHR088W     |
| ORTHOMCL3011 |                                                                                                                      | 14977.m04933 E04A4.4a FBpp0087449 Minc17950 Tsp_05739 YKR079C    |
| ORTHOMCL3012 |                                                                                                                      | 14977.m04967 FBpp0081906 Minc04290 Tsp_00229 YOR143C ZK637.9b    |
| ORTHOMCL3013 | Clr distal_tip_cell_migration_abnormal<br>Emb Pvl Ste Lva Sck<br>transgene_subcellular_localization_ab<br>normal Gro | 14977.m04984 FBpp0083684 Minc16484 T05C12.7 Tsp_04075 YDR212W    |
| ORTHOMCL3017 |                                                                                                                      | 14977.m05014 C47D12.1a FBpp0085431 Minc18017 Tsp_10464 YHR099W   |
| ORTHOMCL3018 | Emb                                                                                                                  | 14977.m05017 F53G2.6 FBpp0077399 Minc12053 Tsp_08210 YOR160W     |
| ORTHOMCL3020 | Pch Emb Unc Rup Bmd Gro                                                                                              | 14977.m05034 FBpp0075839 Minc01765 Tsp_03661 YKL028W ZK550.4     |
| ORTHOMCL3025 | Pch Emb                                                                                                              | 14977.m05069 F33A8.1 FBpp0080638 Minc02744 Tsp_05710 YGR278W     |
| ORTHOMCL3027 | WT                                                                                                                   | 14977.m05106 C08B11.8 FBpp0079595 Minc07767 Tsp_07541 YOR002W    |
| ORTHOMCL3031 | Emb Lva reduced_brood_size                                                                                           | 14979.m04376 F37C12.1 FBpp0086387 Minc07695 Tsp_05442 YKL095W    |
| ORTHOMCL3035 | WT                                                                                                                   | 14979.m04412 FBpp0112471 Minc07622 Tsp_00228 Y48G9A.1 YGL195W    |
| ORTHOMCL3037 |                                                                                                                      | 14979.m04452 FBpp0085527 Minc15808a R01H10.3c Tsp_01713 YLR429W  |
| ORTHOMCL3045 | WT                                                                                                                   | 14979.m04523 FBpp0083167 Minc01703 Tsp_10032 Y71H2AM.6 YIL083C   |
| ORTHOMCL3052 | Pvl Unc Gro                                                                                                          | 14979.m04604 FBpp0070643 Minc00400 Tsp_06359 W02D7.7 YGL200C     |
| ORTHOMCL3057 | Emb                                                                                                                  | 14979.m04656 FBpp0071503 Minc07330 Tsp_03297 Y50D7A.2 YER171W    |
| ORTHOMCL3062 | WT                                                                                                                   | 14980.m02684 FBpp0071817 M03C11.5 Minc19020 Tsp_00240 YPR024W    |
| ORTHOMCL3064 | Emb Ste Lva                                                                                                          | 14980.m02695 FBpp0073003 Minc01440a Tsp_01788 Y54F10BM.2 YAL035W |
| ORTHOMCL3072 | Dpy Emb Lvl Unc Bmd Lva<br>transgene_expression_increased Gro                                                        | 14980.m02764 B0285.1 FBpp0078014 Minc03854 Tsp_01670 YKL139W     |
| ORTHOMCL3078 | Emb Pvl Ste Unc Lva Sck Stp Gro                                                                                      | 14980.m02812 FBpp0074918 Minc17656 T20B12.1 Tsp_05597 YNL313C    |
| ORTHOMCL3092 | WT                                                                                                                   | 14981.m02416 FBpp0074822 Minc00804 Tsp_05916 Y55F3AM.4 YNR007C   |
| ORTHOMCL3093 |                                                                                                                      | 14981.m02419 FBpp0081262 H17B01.4a Minc11519 Tsp_05809 YCL045C   |
| ORTHOMCL3095 | Emb unclassified                                                                                                     | 14981.m02426 C47D12.8 FBpp0070624 Minc12332 Tsp_10891 YPL022W    |
| ORTHOMCL3096 | WT                                                                                                                   | 14981.m02430 FBpp0110549 Minc11505 Tsp_08058 Y54E2A.12 YFL027C   |
| ORTHOMCL3097 | Dpy Emb Lvl Ric Unc Bmd Lva Gro                                                                                      | 14981.m02432 F08D12.1 FBpp0083319 Minc11506 Tsp_08515 YPL210C    |
| ORTHOMCL3098 |                                                                                                                      | 14981.m02447 FBpp0081317 Minc17521 Tsp_00580 Y17G7B.5a YBL023C   |
| ORTHOMCL3101 | Dpy small Slu Emb Pvl Lva Stp Gro<br>lipid_depleted Lva                                                              | 14981.m02456 FBpp0079590 Minc16915 Tsp_05534 YOL141W ZK970.2     |
| ORTHOMCL3102 | reduced_brood_size                                                                                                   | 14982.m02207 FBpp0089153 Minc17605 Tsp_09896 Y48C3A.7 YLL034C    |
| ORTHOMCL3107 |                                                                                                                      | 14982.m02242 F37C12.13a FBpp0074129 Minc00386 Tsp_00006 YDR280W  |
| ORTHOMCL3109 | Emb Sck                                                                                                              | 14982.m02265 FBpp0074660 M03C11.7 Minc11621 Tsp_07851 YDR473C    |

|              |                                                                                                                                   |              |             |             |            |            |          |
|--------------|-----------------------------------------------------------------------------------------------------------------------------------|--------------|-------------|-------------|------------|------------|----------|
| ORTHOMCL3114 | WT                                                                                                                                | 14990.m07668 | FBpp0082215 | K11G12.5    | Minc03312  | Tsp_02240  | YLR348C  |
| ORTHOMCL3115 | Ste                                                                                                                               | 14990.m07677 | FBpp0083629 | Minc16804   | Tsp_00416  | W09C3.4    | YNR003C  |
| ORTHOMCL3116 | WT                                                                                                                                | 14990.m07684 | FBpp0087865 | Minc08963   | Tsp_08777  | Y71G12B.8  | YLL008W  |
| ORTHOMCL3120 |                                                                                                                                   | 14990.m07719 | FBpp0073073 | Minc16016   | Tsp_10095  | Y105E8B.8a | YML130C  |
|              | distal_tip_cell_migration_abnormal Pch<br>Emb Pvl Unc Ste Lva Sck                                                                 |              |             |             |            |            |          |
| ORTHOMCL3122 | transgene_expression_increased Gro<br>Emb Lvl Lon Unc Bmd Lva Sck<br>early_larval_arrest                                          | 14990.m07752 | FBpp0087764 | Minc00339   | Tsp_03480  | Y55F3AR.3  | YJL008C  |
|              | transgene_subcellular_localization_ab<br>normal                                                                                   |              |             |             |            |            |          |
| ORTHOMCL3123 | Emb Lvl Ste Lva                                                                                                                   | 14990.m07753 | FBpp0073847 | K02F2.2     | Minc17349a | Tsp_04769  | YER043C  |
|              | transgene_subcellular_localization_ab<br>normal Gro                                                                               |              |             |             |            |            |          |
| ORTHOMCL3124 |                                                                                                                                   | 14990.m07762 | F36A2.6     | FBpp0086269 | Minc18053  | Tsp_02186  | YOL040C  |
| ORTHOMCL3125 | Emb Lvl Ste Lva                                                                                                                   | 14990.m07764 | C30F8.2     | FBpp0070584 | Minc18052  | Tsp_05300  | YLR447C  |
| ORTHOMCL3127 | Emb                                                                                                                               | 14990.m07815 | FBpp0083514 | Minc18245   | Tsp_09727  | Y47D3A.29  | YNL102W  |
| ORTHOMCL3130 | Emb Ste Lva Sck                                                                                                                   | 14990.m07831 | FBpp0082591 | Minc17095   | Tsp_11644  | Y54E10BR.6 | YDR404C  |
| ORTHOMCL3132 | Emb Ste reduced_brood_size<br>Prl Emb Mlt Lvl Ric Ste Unc Lva Gro                                                                 | 14990.m07835 | FBpp0071248 | Minc05202   | Tsp_10801  | Y54E10BL.6 | YJL128C  |
|              | transgene_subcellular_localization_ab<br>normal                                                                                   |              |             |             |            |            |          |
| ORTHOMCL3135 |                                                                                                                                   | 14990.m07862 | FBpp0074278 | Minc16917   | Tsp_05353  | Y34D9A.10  | YPR173C  |
| ORTHOMCL3144 | WT                                                                                                                                | 14990.m07967 | FBpp0079327 | M01E5.2     | Minc06136b | Tsp_05365  | YHR168W  |
| ORTHOMCL3149 |                                                                                                                                   | 14990.m07989 | FBpp0075866 | M01B12.5a   | Minc11010  | Tsp_08684  | YOR119C  |
| ORTHOMCL3150 | thin Lva Gro                                                                                                                      | 14990.m08001 | C10H11.8    | FBpp0071303 | Minc04061  | Tsp_00266  | YNL006W  |
| ORTHOMCL3153 | Emb                                                                                                                               | 14990.m08017 | FBpp0088408 | Minc16206   | Tsp_10364  | W08E3.3    | YBR025C  |
| ORTHOMCL3155 | Emb Pvl Ste Unc Rup Gro                                                                                                           | 14990.m08048 | FBpp0086223 | Minc17683   | Tsp_05685  | Y47G6A.8   | YKL113C  |
| ORTHOMCL3162 | Emb Lva reduced_brood_size<br>Emb Mlt Lvl Lon Unc Ste Lva                                                                         | 14990.m08091 | B0205.6     | FBpp0079874 | Minc04068  | Tsp_02416  | YCL017C  |
| ORTHOMCL3164 | unclassified Gro                                                                                                                  | 14990.m08097 | FBpp0078973 | Minc11011   | Tsp_08094  | Y48B6A.3   | YOR048C  |
| ORTHOMCL3168 |                                                                                                                                   | 14990.m08127 | F02E9.4b    | FBpp0087003 | Minc11800  | Tsp_00655  | YOL004W  |
| ORTHOMCL3169 |                                                                                                                                   | 14990.m08143 | FBpp0087984 | Minc13935b  | T08G11.1a  | Tsp_05552  | YLL040C  |
| ORTHOMCL3170 |                                                                                                                                   | 14990.m08144 | FBpp0077497 | Minc11006   | Tsp_08848  | Y65B4BR.4a | YER125W  |
| ORTHOMCL3175 | Emb<br>embryonic_morphology_abnormal<br>gastrulation_abnormal Emb Ste Mig<br>cell_proliferation_increased Ced Stp<br>Gro          | 14992.m10836 | F26F2.7     | FBpp0083043 | Minc10353  | Tsp_04290  | YER140W  |
| ORTHOMCL3179 |                                                                                                                                   | 14992.m10856 | FBpp0087110 | Minc09753   | T21H3.3    | Tsp_03217  | YBR109C  |
| ORTHOMCL3181 |                                                                                                                                   | 14992.m10877 | C47E12.5a   | FBpp0087583 | Minc17080  | Tsp_02492  | YKL210W  |
|              | Emb Ste Sck<br>transgene_subcellular_localization_ab<br>normal                                                                    |              |             |             |            |            |          |
| ORTHOMCL3182 |                                                                                                                                   | 14992.m10882 | FBpp0070402 | M03F8.3     | Minc02375  | Tsp_09327  | YLR117C  |
| ORTHOMCL3188 |                                                                                                                                   | 14992.m10913 | C37H5.6a    | FBpp0083395 | Minc06952  | Tsp_02901  | YNL220W  |
| ORTHOMCL3191 | WT                                                                                                                                | 14992.m10931 | FBpp0086720 | Minc17033   | Tsp_10866  | Y60A3A.13  | YPR047W  |
| ORTHOMCL3195 | WT<br>Emb Mei Pvl Lvl Unc Ste<br>protein_subcellular_localization_abnor<br>mal<br>chromosome_segregation_abnormal<br>unclassified | 14992.m10962 | F53F4.3     | FBpp0085690 | Minc16973  | Tsp_03184  | YNL148C  |
| ORTHOMCL3199 |                                                                                                                                   | 14992.m10991 | F18E2.3     | FBpp0078977 | Minc15566  | Tsp_06183  | YIL026C  |
| ORTHOMCL3200 | Pvl Ste early_larval_arrest                                                                                                       | 14992.m10995 | FBpp0079607 | Minc02738   | Tsp_08939  | W09C5.1    | YER126C  |
| ORTHOMCL3208 | Clr Pch Gro                                                                                                                       | 14992.m11113 | C24G6.8     | FBpp0081196 | Minc18255  | Tsp_02906  | YBL057C  |
| ORTHOMCL3209 |                                                                                                                                   | 14992.m11127 | FBpp0071740 | Minc11746   | T04H1.4b   | Tsp_00253  | YNL250W  |
| ORTHOMCL3221 | late_larval_arrest Lva Gro                                                                                                        | 14992.m11287 | FBpp0087709 | Minc02974a  | Tsp_03427  | Y39B6A.14  | YGR245C  |
|              | germ_cell_development_abnormal<br>Emb gonad_development_abnormal                                                                  |              |             |             |            |            |          |
| ORTHOMCL3222 |                                                                                                                                   | 14992.m11312 | FBpp0081640 | Minc13153   | Tsp_00410  | Y57E12AL.5 | YHR058C  |
| ORTHOMCL3225 |                                                                                                                                   | 14992.m11326 | FBpp0078583 | Minc00785   | Tsp_02484  | YLR239C    | ZC410.7b |
|              | Emb Lvl Unc Bmd Lva<br>transgene_expression_increased Stp<br>Gro                                                                  |              |             |             |            |            |          |
| ORTHOMCL3226 |                                                                                                                                   | 14992.m11328 | B0035.11    | FBpp0078353 | Minc17189  | Tsp_05978  | YOR123C  |
| ORTHOMCL3228 | WT                                                                                                                                | 14992.m11360 | C01G10.10   | FBpp0074583 | Minc13298  | Tsp_05524  | YDL104C  |
| ORTHOMCL3230 |                                                                                                                                   | 14992.m11367 | F41E6.4a    | FBpp0082285 | Minc12906  | Tsp_02930  | YNL201C  |

|              |                                                                                                                                                                 |                                                                 |
|--------------|-----------------------------------------------------------------------------------------------------------------------------------------------------------------|-----------------------------------------------------------------|
| ORTHOMCL3232 | Emo Emb Lvl ovulation_abnormal Ste<br>Lva unclassified reduced_brood_size<br>transgene_subcellular_localization_ab<br>normal Gro Stp                            | 14992.m11391 C17H12.14 FBpp0078349 Minc12533 Tsp_00958 YOR332W  |
| ORTHOMCL3234 | reduced_brood_size<br>developmental_delay_postembryonic                                                                                                         | 14992.m11407 FBpp0071277 Minc16223 Tsp_00811 W03F9.1 YGR211W    |
| ORTHOMCL3235 | WT                                                                                                                                                              | 14992.m11412 F41E6.9 FBpp0074964 Minc12903 Tsp_06047 YDR486C    |
| ORTHOMCL3236 | WT                                                                                                                                                              | 14992.m11418 C01G10.8 FBpp0085258 Minc18254a Tsp_02541 YDR214W  |
| ORTHOMCL3237 | Spn Emb Cyk unclassified                                                                                                                                        | 14992.m11420 F26E4.10 FBpp0087926 Minc14843 Tsp_06192 YMR239C   |
| ORTHOMCL3238 | WT                                                                                                                                                              | 14992.m11424 FBpp0082570 K08H10.9 Minc14484 Tsp_08307 YOR115C   |
| ORTHOMCL3239 |                                                                                                                                                                 | 15009.m00160 FBpp0073900 Minc14666 Tsp_03047 Y39B6A.3b YLL027W  |
| ORTHOMCL3241 | Lvl late_larval_arrest Lva                                                                                                                                      | 15032.m00057 F55B12.4 FBpp0078373 Minc13960a Tsp_04511 YER168C  |
| ORTHOMCL3244 | Emb Ste Lva early_larval_arrest Gro<br>Egl distal_tip_cell_migration_abnormal<br>ectopic_expression_transgene Emb<br>Pvl Unc Ste Lva ray_ectopic Vul Stp<br>Gro | 15083.m00074 C47E12.7 FBpp0080052 Minc10026 Tsp_07494 YDR087C   |
| ORTHOMCL3245 |                                                                                                                                                                 | 15097.m00070 FBpp0076457 Minc15474 Tsp_09908 W02A11.4 YDR390C   |
| ORTHOMCL3248 | distal_tip_cell_migration_abnormal<br>Emb Unc Bmd Lva                                                                                                           | 15131.m00095 F49D11.1 FBpp0083581 Minc10024 Tsp_12048 YDR364C   |
| ORTHOMCL3250 | Emb Lva sterile_F1<br>reduced_brood_size Stp Gro                                                                                                                | 15133.m00188 E02H1.1 FBpp0084729 Minc18613 Tsp_00414 YPL266W    |
| ORTHOMCL3254 | Emb Sck Stp<br>Sle Emb Ste Lva early_larval_arrest<br>Gro                                                                                                       | 15158.m00054 FBpp0082356 Minc06361 Tsp_06875 Y105E8A.20 YGR171C |
| ORTHOMCL3256 |                                                                                                                                                                 | 15158.m00057 C15H11.9 FBpp0076738 Minc13549 Tsp_00837 YOR294W   |
| ORTHOMCL3270 | Sle Emb Lvl Ste Lva Sck Stp Gro                                                                                                                                 | 15233.m00028 FBpp0071892 Minc09547 T01C3.7 Tsp_01344 YDL014W    |
| ORTHOMCL3271 |                                                                                                                                                                 | 15242.m00013 FBpp0086097 Minc08196 Tsp_02250 Y54E2A.11a YOR361C |
| ORTHOMCL3272 | Dpy Slu Emb Ste Lva Sck<br>transgene_subcellular_localization_ab<br>normal                                                                                      | 15258.m00017 F54E7.2 FBpp0075614 Minc07126 Tsp_07028 YOR369C    |
| ORTHOMCL3273 | WT                                                                                                                                                              | 15263.m00046 F55A3.1 FBpp0072779 Minc07559 Tsp_10121 YIL030C    |
| ORTHOMCL3274 | WT                                                                                                                                                              | 15276.m00013 FBpp0077790 Minc18075 R09E12.3 Tsp_03199 YOR027W   |
| ORTHOMCL3281 |                                                                                                                                                                 | 15304.m00117 C47B2.6b FBpp0072455 Minc18399 Tsp_10020 YBR019C   |
| ORTHOMCL3287 | small Emb Mlt Lvl Unc<br>fat_content_reduced Lva Adl Gro                                                                                                        | 15410.m00008 FBpp0078598 Minc12641 T27F7.1 Tsp_01988 YKL041W    |
| ORTHOMCL3289 | Emb                                                                                                                                                             | 15432.m00013 FBpp0081087 Minc15246 Tsp_03194 Y75B8A.14 YLR243W  |
| ORTHOMCL3290 | Slu Pvl Unc Stp Gro                                                                                                                                             | 15434.m00030 FBpp0072976 Minc06101 T27A3.2 Tsp_11048 YBR058C    |
| ORTHOMCL3296 | Stp                                                                                                                                                             | 15508.m00009 C10C6.1 FBpp0075315 Minc13998 Tsp_09405 YFL033C    |
| ORTHOMCL3300 |                                                                                                                                                                 | 15544.m00027 F19B6.2a FBpp0075952 Minc05176 Tsp_00718 YGR048W   |



**Supplementary Table 9.** Gene counts of the 274 Nematode Orthologous Groups (including the 85 nematode-specific single-copy genes).

| Orthologous group<br>ID       | Number of genes   |                     |                  |                    |
|-------------------------------|-------------------|---------------------|------------------|--------------------|
|                               | <i>C. elegans</i> | <i>M. incognita</i> | <i>B. malayi</i> | <i>T. spiralis</i> |
| ORTHOMCL0(421_genes,4_taxa):  | 2                 | 24                  | 194              | 201                |
| ORTHOMCL40(59_genes,4_taxa):  | 33                | 19                  | 2                | 5                  |
| ORTHOMCL221(20_genes,4_taxa): | 14                | 4                   | 1                | 1                  |
| ORTHOMCL241(19_genes,4_taxa): | 9                 | 8                   | 1                | 1                  |
| ORTHOMCL258(18_genes,4_taxa): | 9                 | 5                   | 1                | 3                  |
| ORTHOMCL275(17_genes,4_taxa): | 9                 | 6                   | 1                | 1                  |
| ORTHOMCL360(14_genes,4_taxa): | 6                 | 4                   | 2                | 2                  |
| ORTHOMCL410(13_genes,4_taxa): | 3                 | 1                   | 1                | 8                  |
| ORTHOMCL481(12_genes,4_taxa): | 1                 | 1                   | 1                | 9                  |
| ORTHOMCL548(11_genes,4_taxa): | 2                 | 6                   | 2                | 1                  |
| ORTHOMCL560(11_genes,4_taxa): | 6                 | 1                   | 3                | 1                  |
| ORTHOMCL592(11_genes,4_taxa): | 5                 | 4                   | 1                | 1                  |
| ORTHOMCL637(10_genes,4_taxa): | 1                 | 2                   | 6                | 1                  |
| ORTHOMCL639(10_genes,4_taxa): | 3                 | 4                   | 1                | 2                  |
| ORTHOMCL724(10_genes,4_taxa): | 4                 | 3                   | 2                | 1                  |
| ORTHOMCL741(10_genes,4_taxa): | 2                 | 4                   | 3                | 1                  |
| ORTHOMCL817(9_genes,4_taxa):  | 2                 | 3                   | 1                | 3                  |
| ORTHOMCL886(9_genes,4_taxa):  | 1                 | 2                   | 2                | 4                  |
| ORTHOMCL896(9_genes,4_taxa):  | 3                 | 1                   | 2                | 3                  |
| ORTHOMCL930(9_genes,4_taxa):  | 1                 | 6                   | 1                | 1                  |
| ORTHOMCL934(9_genes,4_taxa):  | 3                 | 3                   | 1                | 2                  |
| ORTHOMCL969(9_genes,4_taxa):  | 1                 | 5                   | 2                | 1                  |
| ORTHOMCL1085(8_genes,4_taxa): | 2                 | 4                   | 1                | 1                  |
| ORTHOMCL1110(8_genes,4_taxa): | 2                 | 1                   | 2                | 3                  |
| ORTHOMCL1140(8_genes,4_taxa): | 2                 | 3                   | 2                | 1                  |
| ORTHOMCL1168(8_genes,4_taxa): | 1                 | 3                   | 2                | 2                  |
| ORTHOMCL1268(8_genes,4_taxa): | 2                 | 1                   | 1                | 4                  |
| ORTHOMCL1289(8_genes,4_taxa): | 1                 | 2                   | 2                | 3                  |
| ORTHOMCL1295(8_genes,4_taxa): | 4                 | 1                   | 2                | 1                  |
| ORTHOMCL1567(7_genes,4_taxa): | 1                 | 2                   | 2                | 2                  |
| ORTHOMCL1596(7_genes,4_taxa): | 2                 | 2                   | 1                | 2                  |
| ORTHOMCL1646(7_genes,4_taxa): | 1                 | 3                   | 1                | 2                  |
| ORTHOMCL1674(7_genes,4_taxa): | 3                 | 2                   | 1                | 1                  |
| ORTHOMCL1692(7_genes,4_taxa): | 1                 | 4                   | 1                | 1                  |
| ORTHOMCL1713(7_genes,4_taxa): | 1                 | 3                   | 1                | 2                  |
| ORTHOMCL1808(7_genes,4_taxa): | 2                 | 2                   | 2                | 1                  |
| ORTHOMCL1816(7_genes,4_taxa): | 2                 | 2                   | 1                | 2                  |
| ORTHOMCL1820(7_genes,4_taxa): | 1                 | 4                   | 1                | 1                  |
| ORTHOMCL1840(7_genes,4_taxa): | 4                 | 1                   | 1                | 1                  |
| ORTHOMCL1939(7_genes,4_taxa): | 2                 | 1                   | 2                | 2                  |
| ORTHOMCL1943(7_genes,4_taxa): | 1                 | 4                   | 1                | 1                  |
| ORTHOMCL2010(7_genes,4_taxa): | 2                 | 2                   | 2                | 1                  |
| ORTHOMCL2040(7_genes,4_taxa): | 3                 | 2                   | 1                | 1                  |
| ORTHOMCL2141(7_genes,4_taxa): | 1                 | 1                   | 1                | 4                  |
| ORTHOMCL2299(6_genes,4_taxa): | 1                 | 2                   | 2                | 1                  |
| ORTHOMCL2380(6_genes,4_taxa): | 1                 | 1                   | 2                | 2                  |
| ORTHOMCL2432(6_genes,4_taxa): | 1                 | 2                   | 2                | 1                  |
| ORTHOMCL2464(6_genes,4_taxa): | 1                 | 3                   | 1                | 1                  |
| ORTHOMCL2496(6_genes,4_taxa): | 2                 | 2                   | 1                | 1                  |

|                               |   |   |   |   |
|-------------------------------|---|---|---|---|
| ORTHOMCL2499(6_genes,4_taxa): | 1 | 3 | 1 | 1 |
| ORTHOMCL2520(6_genes,4_taxa): | 1 | 2 | 2 | 1 |
| ORTHOMCL2524(6_genes,4_taxa): | 1 | 1 | 1 | 3 |
| ORTHOMCL2644(6_genes,4_taxa): | 1 | 3 | 1 | 1 |
| ORTHOMCL2669(6_genes,4_taxa): | 1 | 2 | 2 | 1 |
| ORTHOMCL2675(6_genes,4_taxa): | 2 | 1 | 2 | 1 |
| ORTHOMCL2681(6_genes,4_taxa): | 1 | 2 | 1 | 2 |
| ORTHOMCL2695(6_genes,4_taxa): | 1 | 2 | 1 | 2 |
| ORTHOMCL2732(6_genes,4_taxa): | 1 | 3 | 1 | 1 |
| ORTHOMCL2753(6_genes,4_taxa): | 1 | 3 | 1 | 1 |
| ORTHOMCL2759(6_genes,4_taxa): | 1 | 2 | 2 | 1 |
| ORTHOMCL2785(6_genes,4_taxa): | 2 | 2 | 1 | 1 |
| ORTHOMCL2787(6_genes,4_taxa): | 2 | 1 | 2 | 1 |
| ORTHOMCL2790(6_genes,4_taxa): | 2 | 2 | 1 | 1 |
| ORTHOMCL2817(6_genes,4_taxa): | 1 | 2 | 2 | 1 |
| ORTHOMCL2821(6_genes,4_taxa): | 1 | 3 | 1 | 1 |
| ORTHOMCL2842(6_genes,4_taxa): | 1 | 2 | 2 | 1 |
| ORTHOMCL2860(6_genes,4_taxa): | 1 | 1 | 1 | 3 |
| ORTHOMCL2870(6_genes,4_taxa): | 2 | 2 | 1 | 1 |
| ORTHOMCL2901(6_genes,4_taxa): | 1 | 2 | 1 | 2 |
| ORTHOMCL2946(6_genes,4_taxa): | 1 | 2 | 1 | 2 |
| ORTHOMCL2970(6_genes,4_taxa): | 1 | 2 | 2 | 1 |
| ORTHOMCL2991(6_genes,4_taxa): | 1 | 3 | 1 | 1 |
| ORTHOMCL3006(6_genes,4_taxa): | 2 | 2 | 1 | 1 |
| ORTHOMCL3028(6_genes,4_taxa): | 1 | 2 | 1 | 2 |
| ORTHOMCL3050(6_genes,4_taxa): | 2 | 1 | 1 | 2 |
| ORTHOMCL3051(6_genes,4_taxa): | 1 | 2 | 1 | 2 |
| ORTHOMCL3053(6_genes,4_taxa): | 1 | 3 | 1 | 1 |
| ORTHOMCL3069(6_genes,4_taxa): | 1 | 2 | 1 | 2 |
| ORTHOMCL3091(6_genes,4_taxa): | 1 | 2 | 1 | 2 |
| ORTHOMCL3100(6_genes,4_taxa): | 1 | 1 | 1 | 3 |
| ORTHOMCL3108(6_genes,4_taxa): | 1 | 2 | 1 | 2 |
| ORTHOMCL3112(6_genes,4_taxa): | 1 | 2 | 1 | 2 |
| ORTHOMCL3172(6_genes,4_taxa): | 1 | 2 | 1 | 2 |
| ORTHOMCL3185(6_genes,4_taxa): | 1 | 3 | 1 | 1 |
| ORTHOMCL3190(6_genes,4_taxa): | 1 | 1 | 1 | 3 |
| ORTHOMCL3216(6_genes,4_taxa): | 2 | 2 | 1 | 1 |
| ORTHOMCL3219(6_genes,4_taxa): | 1 | 2 | 1 | 2 |
| ORTHOMCL3286(6_genes,4_taxa): | 3 | 1 | 1 | 1 |
| ORTHOMCL3515(5_genes,4_taxa): | 1 | 2 | 1 | 1 |
| ORTHOMCL3530(5_genes,4_taxa): | 1 | 1 | 1 | 2 |
| ORTHOMCL3539(5_genes,4_taxa): | 1 | 2 | 1 | 1 |
| ORTHOMCL3540(5_genes,4_taxa): | 1 | 2 | 1 | 1 |
| ORTHOMCL3552(5_genes,4_taxa): | 1 | 2 | 1 | 1 |
| ORTHOMCL3585(5_genes,4_taxa): | 1 | 2 | 1 | 1 |
| ORTHOMCL3588(5_genes,4_taxa): | 1 | 1 | 2 | 1 |
| ORTHOMCL3590(5_genes,4_taxa): | 2 | 1 | 1 | 1 |
| ORTHOMCL3599(5_genes,4_taxa): | 1 | 1 | 1 | 2 |
| ORTHOMCL3612(5_genes,4_taxa): | 1 | 1 | 1 | 2 |
| ORTHOMCL3624(5_genes,4_taxa): | 1 | 2 | 1 | 1 |
| ORTHOMCL3656(5_genes,4_taxa): | 1 | 1 | 2 | 1 |
| ORTHOMCL3657(5_genes,4_taxa): | 1 | 2 | 1 | 1 |
| ORTHOMCL3658(5_genes,4_taxa): | 1 | 2 | 1 | 1 |
| ORTHOMCL3665(5_genes,4_taxa): | 1 | 2 | 1 | 1 |

|                               |   |   |   |   |
|-------------------------------|---|---|---|---|
| ORTHOMCL3713(5_genes,4_taxa): | 1 | 2 | 1 | 1 |
| ORTHOMCL3718(5_genes,4_taxa): | 1 | 2 | 1 | 1 |
| ORTHOMCL3728(5_genes,4_taxa): | 1 | 2 | 1 | 1 |
| ORTHOMCL3737(5_genes,4_taxa): | 1 | 2 | 1 | 1 |
| ORTHOMCL3740(5_genes,4_taxa): | 1 | 1 | 1 | 2 |
| ORTHOMCL3796(5_genes,4_taxa): | 1 | 1 | 1 | 2 |
| ORTHOMCL3799(5_genes,4_taxa): | 1 | 2 | 1 | 1 |
| ORTHOMCL3815(5_genes,4_taxa): | 1 | 2 | 1 | 1 |
| ORTHOMCL3822(5_genes,4_taxa): | 1 | 2 | 1 | 1 |
| ORTHOMCL3825(5_genes,4_taxa): | 1 | 2 | 1 | 1 |
| ORTHOMCL3833(5_genes,4_taxa): | 1 | 2 | 1 | 1 |
| ORTHOMCL3859(5_genes,4_taxa): | 1 | 2 | 1 | 1 |
| ORTHOMCL3870(5_genes,4_taxa): | 1 | 2 | 1 | 1 |
| ORTHOMCL3923(5_genes,4_taxa): | 2 | 1 | 1 | 1 |
| ORTHOMCL3926(5_genes,4_taxa): | 1 | 2 | 1 | 1 |
| ORTHOMCL3943(5_genes,4_taxa): | 1 | 2 | 1 | 1 |
| ORTHOMCL3958(5_genes,4_taxa): | 1 | 1 | 1 | 2 |
| ORTHOMCL3960(5_genes,4_taxa): | 2 | 1 | 1 | 1 |
| ORTHOMCL3978(5_genes,4_taxa): | 1 | 1 | 1 | 2 |
| ORTHOMCL3980(5_genes,4_taxa): | 1 | 1 | 2 | 1 |
| ORTHOMCL4002(5_genes,4_taxa): | 1 | 2 | 1 | 1 |
| ORTHOMCL4006(5_genes,4_taxa): | 1 | 2 | 1 | 1 |
| ORTHOMCL4009(5_genes,4_taxa): | 1 | 2 | 1 | 1 |
| ORTHOMCL4012(5_genes,4_taxa): | 1 | 1 | 2 | 1 |
| ORTHOMCL4016(5_genes,4_taxa): | 1 | 2 | 1 | 1 |
| ORTHOMCL4027(5_genes,4_taxa): | 2 | 1 | 1 | 1 |
| ORTHOMCL4028(5_genes,4_taxa): | 1 | 2 | 1 | 1 |
| ORTHOMCL4036(5_genes,4_taxa): | 1 | 2 | 1 | 1 |
| ORTHOMCL4040(5_genes,4_taxa): | 1 | 2 | 1 | 1 |
| ORTHOMCL4043(5_genes,4_taxa): | 2 | 1 | 1 | 1 |
| ORTHOMCL4049(5_genes,4_taxa): | 1 | 2 | 1 | 1 |
| ORTHOMCL4050(5_genes,4_taxa): | 1 | 1 | 1 | 2 |
| ORTHOMCL4083(5_genes,4_taxa): | 1 | 2 | 1 | 1 |
| ORTHOMCL4089(5_genes,4_taxa): | 1 | 2 | 1 | 1 |
| ORTHOMCL4095(5_genes,4_taxa): | 1 | 2 | 1 | 1 |
| ORTHOMCL4103(5_genes,4_taxa): | 1 | 2 | 1 | 1 |
| ORTHOMCL4114(5_genes,4_taxa): | 1 | 2 | 1 | 1 |
| ORTHOMCL4121(5_genes,4_taxa): | 1 | 2 | 1 | 1 |
| ORTHOMCL4131(5_genes,4_taxa): | 1 | 2 | 1 | 1 |
| ORTHOMCL4141(5_genes,4_taxa): | 1 | 2 | 1 | 1 |
| ORTHOMCL4142(5_genes,4_taxa): | 1 | 2 | 1 | 1 |
| ORTHOMCL4148(5_genes,4_taxa): | 1 | 2 | 1 | 1 |
| ORTHOMCL4150(5_genes,4_taxa): | 2 | 1 | 1 | 1 |
| ORTHOMCL4151(5_genes,4_taxa): | 1 | 1 | 1 | 2 |
| ORTHOMCL4155(5_genes,4_taxa): | 1 | 2 | 1 | 1 |
| ORTHOMCL4160(5_genes,4_taxa): | 1 | 1 | 1 | 2 |
| ORTHOMCL4162(5_genes,4_taxa): | 1 | 2 | 1 | 1 |
| ORTHOMCL4164(5_genes,4_taxa): | 1 | 1 | 1 | 2 |
| ORTHOMCL4165(5_genes,4_taxa): | 1 | 1 | 1 | 2 |
| ORTHOMCL4179(5_genes,4_taxa): | 1 | 2 | 1 | 1 |
| ORTHOMCL4181(5_genes,4_taxa): | 1 | 1 | 1 | 2 |
| ORTHOMCL4185(5_genes,4_taxa): | 1 | 2 | 1 | 1 |
| ORTHOMCL4205(5_genes,4_taxa): | 1 | 2 | 1 | 1 |
| ORTHOMCL4219(5_genes,4_taxa): | 1 | 2 | 1 | 1 |

|                               |   |   |   |   |
|-------------------------------|---|---|---|---|
| ORTHOMCL4225(5_genes,4_taxa): | 1 | 1 | 1 | 2 |
| ORTHOMCL4232(5_genes,4_taxa): | 1 | 2 | 1 | 1 |
| ORTHOMCL4242(5_genes,4_taxa): | 2 | 1 | 1 | 1 |
| ORTHOMCL4252(5_genes,4_taxa): | 1 | 2 | 1 | 1 |
| ORTHOMCL4260(5_genes,4_taxa): | 1 | 2 | 1 | 1 |
| ORTHOMCL4261(5_genes,4_taxa): | 1 | 2 | 1 | 1 |
| ORTHOMCL4283(5_genes,4_taxa): | 1 | 2 | 1 | 1 |
| ORTHOMCL4287(5_genes,4_taxa): | 1 | 2 | 1 | 1 |
| ORTHOMCL4288(5_genes,4_taxa): | 1 | 2 | 1 | 1 |
| ORTHOMCL4310(5_genes,4_taxa): | 1 | 2 | 1 | 1 |
| ORTHOMCL4323(5_genes,4_taxa): | 1 | 2 | 1 | 1 |
| ORTHOMCL4327(5_genes,4_taxa): | 1 | 2 | 1 | 1 |
| ORTHOMCL4337(5_genes,4_taxa): | 1 | 1 | 1 | 2 |
| ORTHOMCL4347(5_genes,4_taxa): | 1 | 2 | 1 | 1 |
| ORTHOMCL4349(5_genes,4_taxa): | 1 | 2 | 1 | 1 |
| ORTHOMCL4361(5_genes,4_taxa): | 2 | 1 | 1 | 1 |
| ORTHOMCL4373(5_genes,4_taxa): | 1 | 1 | 1 | 2 |
| ORTHOMCL4375(5_genes,4_taxa): | 1 | 2 | 1 | 1 |
| ORTHOMCL4379(5_genes,4_taxa): | 1 | 1 | 1 | 2 |
| ORTHOMCL4406(5_genes,4_taxa): | 1 | 2 | 1 | 1 |
| ORTHOMCL4416(5_genes,4_taxa): | 1 | 2 | 1 | 1 |
| ORTHOMCL4417(5_genes,4_taxa): | 1 | 2 | 1 | 1 |
| ORTHOMCL4419(5_genes,4_taxa): | 1 | 2 | 1 | 1 |
| ORTHOMCL4427(5_genes,4_taxa): | 1 | 2 | 1 | 1 |
| ORTHOMCL4441(5_genes,4_taxa): | 1 | 2 | 1 | 1 |
| ORTHOMCL4443(5_genes,4_taxa): | 1 | 1 | 1 | 2 |
| ORTHOMCL4451(5_genes,4_taxa): | 1 | 2 | 1 | 1 |
| ORTHOMCL4459(5_genes,4_taxa): | 1 | 2 | 1 | 1 |
| ORTHOMCL4493(5_genes,4_taxa): | 1 | 2 | 1 | 1 |
| ORTHOMCL4512(5_genes,4_taxa): | 1 | 2 | 1 | 1 |
| ORTHOMCL4525(5_genes,4_taxa): | 1 | 2 | 1 | 1 |
| ORTHOMCL4560(5_genes,4_taxa): | 1 | 2 | 1 | 1 |
| ORTHOMCL4887(4_genes,4_taxa): | 1 | 1 | 1 | 1 |
| ORTHOMCL4904(4_genes,4_taxa): | 1 | 1 | 1 | 1 |
| ORTHOMCL4953(4_genes,4_taxa): | 1 | 1 | 1 | 1 |
| ORTHOMCL4963(4_genes,4_taxa): | 1 | 1 | 1 | 1 |
| ORTHOMCL4982(4_genes,4_taxa): | 1 | 1 | 1 | 1 |
| ORTHOMCL5007(4_genes,4_taxa): | 1 | 1 | 1 | 1 |
| ORTHOMCL5011(4_genes,4_taxa): | 1 | 1 | 1 | 1 |
| ORTHOMCL5013(4_genes,4_taxa): | 1 | 1 | 1 | 1 |
| ORTHOMCL5044(4_genes,4_taxa): | 1 | 1 | 1 | 1 |
| ORTHOMCL5045(4_genes,4_taxa): | 1 | 1 | 1 | 1 |
| ORTHOMCL5056(4_genes,4_taxa): | 1 | 1 | 1 | 1 |
| ORTHOMCL5057(4_genes,4_taxa): | 1 | 1 | 1 | 1 |
| ORTHOMCL5058(4_genes,4_taxa): | 1 | 1 | 1 | 1 |
| ORTHOMCL5067(4_genes,4_taxa): | 1 | 1 | 1 | 1 |
| ORTHOMCL5084(4_genes,4_taxa): | 1 | 1 | 1 | 1 |
| ORTHOMCL5111(4_genes,4_taxa): | 1 | 1 | 1 | 1 |
| ORTHOMCL5142(4_genes,4_taxa): | 1 | 1 | 1 | 1 |
| ORTHOMCL5147(4_genes,4_taxa): | 1 | 1 | 1 | 1 |
| ORTHOMCL5148(4_genes,4_taxa): | 1 | 1 | 1 | 1 |
| ORTHOMCL5155(4_genes,4_taxa): | 1 | 1 | 1 | 1 |
| ORTHOMCL5157(4_genes,4_taxa): | 1 | 1 | 1 | 1 |
| ORTHOMCL5160(4_genes,4_taxa): | 1 | 1 | 1 | 1 |

|                               |   |   |   |   |
|-------------------------------|---|---|---|---|
| ORTHOMCL5167(4_genes,4_taxa): | 1 | 1 | 1 | 1 |
| ORTHOMCL5211(4_genes,4_taxa): | 1 | 1 | 1 | 1 |
| ORTHOMCL5213(4_genes,4_taxa): | 1 | 1 | 1 | 1 |
| ORTHOMCL5241(4_genes,4_taxa): | 1 | 1 | 1 | 1 |
| ORTHOMCL5254(4_genes,4_taxa): | 1 | 1 | 1 | 1 |
| ORTHOMCL5261(4_genes,4_taxa): | 1 | 1 | 1 | 1 |
| ORTHOMCL5275(4_genes,4_taxa): | 1 | 1 | 1 | 1 |
| ORTHOMCL5285(4_genes,4_taxa): | 1 | 1 | 1 | 1 |
| ORTHOMCL5321(4_genes,4_taxa): | 1 | 1 | 1 | 1 |
| ORTHOMCL5330(4_genes,4_taxa): | 1 | 1 | 1 | 1 |
| ORTHOMCL5367(4_genes,4_taxa): | 1 | 1 | 1 | 1 |
| ORTHOMCL5374(4_genes,4_taxa): | 1 | 1 | 1 | 1 |
| ORTHOMCL5396(4_genes,4_taxa): | 1 | 1 | 1 | 1 |
| ORTHOMCL5414(4_genes,4_taxa): | 1 | 1 | 1 | 1 |
| ORTHOMCL5417(4_genes,4_taxa): | 1 | 1 | 1 | 1 |
| ORTHOMCL5418(4_genes,4_taxa): | 1 | 1 | 1 | 1 |
| ORTHOMCL5436(4_genes,4_taxa): | 1 | 1 | 1 | 1 |
| ORTHOMCL5443(4_genes,4_taxa): | 1 | 1 | 1 | 1 |
| ORTHOMCL5453(4_genes,4_taxa): | 1 | 1 | 1 | 1 |
| ORTHOMCL5475(4_genes,4_taxa): | 1 | 1 | 1 | 1 |
| ORTHOMCL5483(4_genes,4_taxa): | 1 | 1 | 1 | 1 |
| ORTHOMCL5484(4_genes,4_taxa): | 1 | 1 | 1 | 1 |
| ORTHOMCL5489(4_genes,4_taxa): | 1 | 1 | 1 | 1 |
| ORTHOMCL5518(4_genes,4_taxa): | 1 | 1 | 1 | 1 |
| ORTHOMCL5522(4_genes,4_taxa): | 1 | 1 | 1 | 1 |
| ORTHOMCL5527(4_genes,4_taxa): | 1 | 1 | 1 | 1 |
| ORTHOMCL5528(4_genes,4_taxa): | 1 | 1 | 1 | 1 |
| ORTHOMCL5540(4_genes,4_taxa): | 1 | 1 | 1 | 1 |
| ORTHOMCL5546(4_genes,4_taxa): | 1 | 1 | 1 | 1 |
| ORTHOMCL5564(4_genes,4_taxa): | 1 | 1 | 1 | 1 |
| ORTHOMCL5571(4_genes,4_taxa): | 1 | 1 | 1 | 1 |
| ORTHOMCL5575(4_genes,4_taxa): | 1 | 1 | 1 | 1 |
| ORTHOMCL5585(4_genes,4_taxa): | 1 | 1 | 1 | 1 |
| ORTHOMCL5586(4_genes,4_taxa): | 1 | 1 | 1 | 1 |
| ORTHOMCL5595(4_genes,4_taxa): | 1 | 1 | 1 | 1 |
| ORTHOMCL5602(4_genes,4_taxa): | 1 | 1 | 1 | 1 |
| ORTHOMCL5632(4_genes,4_taxa): | 1 | 1 | 1 | 1 |
| ORTHOMCL5647(4_genes,4_taxa): | 1 | 1 | 1 | 1 |
| ORTHOMCL5652(4_genes,4_taxa): | 1 | 1 | 1 | 1 |
| ORTHOMCL5655(4_genes,4_taxa): | 1 | 1 | 1 | 1 |
| ORTHOMCL5673(4_genes,4_taxa): | 1 | 1 | 1 | 1 |
| ORTHOMCL5687(4_genes,4_taxa): | 1 | 1 | 1 | 1 |
| ORTHOMCL5689(4_genes,4_taxa): | 1 | 1 | 1 | 1 |
| ORTHOMCL5691(4_genes,4_taxa): | 1 | 1 | 1 | 1 |
| ORTHOMCL5707(4_genes,4_taxa): | 1 | 1 | 1 | 1 |
| ORTHOMCL5715(4_genes,4_taxa): | 1 | 1 | 1 | 1 |
| ORTHOMCL5730(4_genes,4_taxa): | 1 | 1 | 1 | 1 |
| ORTHOMCL5737(4_genes,4_taxa): | 1 | 1 | 1 | 1 |
| ORTHOMCL5742(4_genes,4_taxa): | 1 | 1 | 1 | 1 |
| ORTHOMCL5754(4_genes,4_taxa): | 1 | 1 | 1 | 1 |
| ORTHOMCL5769(4_genes,4_taxa): | 1 | 1 | 1 | 1 |
| ORTHOMCL5772(4_genes,4_taxa): | 1 | 1 | 1 | 1 |
| ORTHOMCL5798(4_genes,4_taxa): | 1 | 1 | 1 | 1 |
| ORTHOMCL5803(4_genes,4_taxa): | 1 | 1 | 1 | 1 |

|                               |   |   |   |   |
|-------------------------------|---|---|---|---|
| ORTHOMCL5805(4_genes,4_taxa): | 1 | 1 | 1 | 1 |
| ORTHOMCL5818(4_genes,4_taxa): | 1 | 1 | 1 | 1 |
| ORTHOMCL5830(4_genes,4_taxa): | 1 | 1 | 1 | 1 |
| ORTHOMCL5837(4_genes,4_taxa): | 1 | 1 | 1 | 1 |
| ORTHOMCL5840(4_genes,4_taxa): | 1 | 1 | 1 | 1 |
| ORTHOMCL5852(4_genes,4_taxa): | 1 | 1 | 1 | 1 |
| ORTHOMCL5864(4_genes,4_taxa): | 1 | 1 | 1 | 1 |
| ORTHOMCL5886(4_genes,4_taxa): | 1 | 1 | 1 | 1 |
| ORTHOMCL5887(4_genes,4_taxa): | 1 | 1 | 1 | 1 |

---

**Supplementary Table 10.** Gene Ontology functions significantly enriched (at P<0.01) or depleted when intra- or inter-specific orthologous groups were compared to the complete repertoire of GO terms for *T. spiralis*.

| GI id                                           | GO Descriptor                                        | P-value          |           |           |           |          |          |          |           |
|-------------------------------------------------|------------------------------------------------------|------------------|-----------|-----------|-----------|----------|----------|----------|-----------|
|                                                 |                                                      | T. spiralis only |           | Ts/Ce     |           | Ts/Bm    |          | Ts/Mi    |           |
|                                                 |                                                      | Depleted         | Enriched  | Depleted  | Enriched  | Depleted | Enriched | Depleted | Enriched  |
| <b>Biological process (1052 GO terms total)</b> |                                                      |                  |           |           |           |          |          |          |           |
| GO:0006412                                      | translation                                          | 5.74E-006        | 0.999998  | 0.0610811 | 0.989314  | 0.064482 | 1        | 0.3187   | 1         |
| GO:0006508                                      | proteolysis                                          | 0.999649         | 0.000545  | 0.16136   | 0.92158   | 0.546561 | 0.655336 | 0.1425   | 1         |
| GO:0006886                                      | intracellular protein transport                      | 1.66E-005        | 0.999996  | 0.239829  | 0.937822  | 0.267562 | 1        | 0.577    | 1         |
| GO:0016043                                      | cellular component organization and biogenesis       | 8.28E-008        | 1         | 0.13137   | 0.972021  | 0.132946 | 1        | 0.2914   | 1         |
| GO:0006189                                      | de novo' IMP biosynthetic process                    | 0.508145         | 1         | 1         | 0.0005968 | 0.976663 | 1        | 0.9902   | 1         |
| GO:0006259                                      | DNA metabolic process                                | 1                | 2.03E-056 | 0.0199741 | 1         | 0.730211 | 0.54585  | 0.2164   | 1         |
| GO:0006278                                      | RNA-dependent DNA replication                        | 1                | 1.36E-006 | 0.332593  | 1         | 0.593024 | 1        | 0.8041   | 1         |
| GO:0006334                                      | nucleosome assembly                                  | 1                | 2.38E-012 | 0.140746  | 1         | 0.394286 | 1        | 0.6783   | 1         |
| GO:0016192                                      | vesicle-mediated transport                           | 0.0002398        | 0.999971  | 0.538304  | 0.794105  | 0.46109  | 1        | 0.724    | 1         |
| GO:0035023                                      | regulation of Rho protein signal transduction        | 0.0008004        | 1         | 0.907303  | 0.407687  | 0.998271 | 0.024533 | 0.9015   | 1         |
| GO:0043170                                      | macromolecule metabolic process                      | 1                | 8.00E-012 | 0.290718  | 0.849286  | 0.194753 | 1        | 0.2961   | 1         |
| GO:0007186                                      | G-protein coupled receptor protein signaling pathway | 0.143298         | 0.906975  | 0.999995  | 2.99E-005 | 0.332912 | 1        | 0.632    | 1         |
| GO:0009060                                      | aerobic respiration                                  | 8.59E-007        | 1         | 0.285933  | 1         | 0.551967 | 1        | 0.7804   | 1         |
| GO:0009086                                      | methionine biosynthetic process                      | 0.508145         | 1         | 1         | 0.0005968 | 0.976663 | 1        | 0.9902   | 1         |
| GO:0015074                                      | DNA integration                                      | 0.589959         | 0.490799  | 0.198434  | 0.951905  | 0.23686  | 1        | 1        | 3.43E-011 |
| <b>Molecular Function (1542 GO terms total)</b> |                                                      |                  |           |           |           |          |          |          |           |
| GO:0005506                                      | iron ion binding                                     | 2.36E-005        | 0.999995  | 0.202813  | 0.950421  | 0.812837 | 0.551408 | 0.7056   | 1         |
| GO:0003677                                      | DNA binding                                          | 0.93298          | 0.082455  | 0.0001925 | 0.999954  | 0.648266 | 0.536156 | 1        | 1.55E-005 |
| GO:0003676                                      | nucleic acid binding                                 | 0.0105466        | 0.992024  | 1         | 7.53E-026 | 0.245441 | 0.854829 | 0.7515   | 0.478907  |
| GO:0003682                                      | chromatin binding                                    | 0.0250016        | 1         | 0.660605  | 1         | 0.895258 | 1        | 1        | 0.0009696 |
| GO:0005524                                      | ATP binding                                          | 0.0066239        | 0.994901  | 0.0009113 | 0.99963   | 0.23432  | 0.878243 | 0.1482   | 0.96872   |
| GO:0020037                                      | heme binding                                         | 0.0001398        | 0.999954  | 0.121085  | 0.974723  | 0.747966 | 0.625207 | 0.6525   | 1         |
| GO:0001584                                      | rhodopsin-like receptor activity                     | 0.169999         | 0.891805  | 0.999951  | 0.0002459 | 0.485202 | 1        | 0.7301   | 1         |
| GO:0005515                                      | protein binding                                      | 3.52E-010        | 1         | 0.132674  | 0.916501  | 0.933749 | 0.131785 | 0.696    | 0.541992  |
| GO:0030414                                      | protease inhibitor activity                          | 1                | 7.38E-008 | 0.544904  | 0.677594  | 0.760249 | 0.612344 | 0.6622   | 1         |
| GO:0031419                                      | cobalamin binding                                    | 0.330977         | 1         | 1         | 6.59E-005 | 0.967375 | 1        | 0.9857   | 1         |
| GO:0004531                                      | deoxyribonuclease II activity                        | 1                | 1.06E-063 | 0.0052771 | 1         | 0.246771 | 1        | 0.5441   | 1         |
| GO:0004252                                      | serine-type endopeptidase activity                   | 1                | 7.17E-011 | 0.684065  | 0.545557  | 0.458766 | 1        | 0.7125   | 1         |
| GO:0005496                                      | steroid binding                                      | 0.330977         | 1         | 0.883123  | 1         | 0.999999 | 0.000354 | 0.9857   | 1         |
| GO:0005089                                      | Rho guanyl-nucleotide exchange factor activity       | 0.0004278        | 1         | 0.791292  | 0.581734  | 0.998546 | 0.021802 | 0.9038   | 1         |
| GO:0003964                                      | RNA-directed DNA polymerase activity                 | 0.999998         | 6.67E-006 | 0.160317  | 1         | 0.613545 | 1        | 0.8086   | 1         |
| GO:0003924                                      | GTPase activity                                      | 4.27E-005        | 0.999993  | 0.11002   | 1         | 0.554904 | 1        | 0.774    | 1         |
| GO:0003735                                      | structural constituent of ribosome                   | 5.12E-008        | 1         | 0.0205093 | 0.997092  | 0.210503 | 1        | 0.5077   | 1         |

|                                                |                              |           |           |           |           |          |          |        |           |
|------------------------------------------------|------------------------------|-----------|-----------|-----------|-----------|----------|----------|--------|-----------|
| GO:0008270                                     | zinc ion binding             | 1.35E-005 | 0.999991  | 0.842932  | 0.214575  | 0.981719 | 0.042023 | 0.9529 | 0.128274  |
| GO:0008565                                     | protein transporter activity | 0.0001723 | 0.99998   | 0.449074  | 0.846246  | 0.60674  | 1        | 0.8046 | 1         |
| <b>Cellular Component (645 GO terms total)</b> |                              |           |           |           |           |          |          |        |           |
| GO:0005840                                     | ribosome                     | 2.53E-005 | 0.999992  | 0.0088291 | 1         | 0.189683 | 0.993431 | 0.5335 | 1         |
| GO:0016021                                     | integral to membrane         | 0.003021  | 0.998034  | 0.999778  | 0.0005712 | 0.042838 | 4        | 0.4608 | 0.850262  |
| GO:0000786                                     | nucleosome                   | 1         | 1.91E-014 | 0.0684267 | 1         | 0.417637 | 1        | 0.7189 | 1         |
| GO:0005576                                     | extracellular region         | 1         | 2.07E-007 | 0.921581  | 0.181419  | 0.651432 | 0.716067 | 0.6214 | 1         |
| GO:0005622                                     | intracellular                | 0.0056329 | 0.996132  | 0.999981  | 5.29E-005 | 0.673445 | 0.518371 | 0.525  | 0.753943  |
| GO:0005634                                     | nucleus                      | 0.999908  | 0.000141  | 2.24E-005 | 0.999996  | 0.953418 | 0.101527 | 0.9956 | 0.0222729 |



**Supplementary Table 11.** Gene Ontology functions significantly enriched (at  $P < 0.01$ ) or depleted when the 2,517 nematode orthologous groups (NOGs). The NOGS were compared to the complete proteomes of the four nematode species. Of the total of 20,208 GO ids in Biological processes 4,918 are associated with the 2,157 NOGs, and of the 27,935 Molecular Function GO ids 6,444 were associated with the 2,517 NOGS. FDR, false discovery rate. Biological Processes GOs are in blue, Molecular Function GOs are in red.

| GO Id      | GO in all 4 species | Go in NOGs | FDR depleted | FDR enriched | P value depleted | P value enriched |
|------------|---------------------|------------|--------------|--------------|------------------|------------------|
| GO:0006096 | 105                 | 41         | 1            | 0.002223     | 0.999873         | 0.0002809        |
| GO:0006099 | 48                  | 25         | 1            | 0.000388     | 0.999991         | 3.11E-05         |
| GO:0006259 | 1044                | 303        | 1            | 0.001276     | 0.0002621        | 0.999881         |
| GO:0006260 | 459                 | 110        | 1            | 1            | 7.08E-05         | 0.999963         |
| GO:0006265 | 37                  | 19         | 1            | 0.001672     | 0.999903         | 0.0003489        |
| GO:0006269 | 11                  | 8          | 1            | 0.004223     | 0.9999           | 0.0009768        |
| GO:0006270 | 43                  | 23         | 1            | 0.000369     | 0.99999          | 3.68E-05         |
| GO:0006304 | 32                  | 17         | 1            | 0.001849     | 0.999988         | 0.0003174        |
| GO:0006334 | 234                 | 107        | 1            | 0            | 1                | 6.20E-13         |
| GO:0006355 | 1787                | 288        | 0            | 1            | 7.53E-18         | 1                |
| GO:0006396 | 421                 | 163        | 1            | 0            | 0.999891         | 0.0002225        |
| GO:0006397 | 95                  | 38         | 1            | 0.002102     | 0.999986         | 4.01E-05         |
| GO:0006412 | 1055                | 387        | 1            | 0            | 1                | 4.83E-17         |
| GO:0006457 | 299                 | 126        | 1            | 0            | 1                | 9.79E-11         |
| GO:0006461 | 214                 | 116        | 1            | 0            | 1                | 1.98E-18         |
| GO:0006468 | 1554                | 316        | 0.000213     | 1            | 2.77E-05         | 0.999979         |
| GO:0006754 | 206                 | 73         | 1            | 0.00125      | 5.71E-05         | 1                |
| GO:0006813 | 282                 | 34         | 0            | 1            | 1.57E-07         | 1                |
| GO:0006814 | 115                 | 14         | 0.004691     | 1            | 0.0008716        | 0.999648         |
| GO:0006817 | 348                 | 47         | 0            | 1            | 3.31E-07         | 1                |
| GO:0006836 | 66                  | 5          | 0.002129     | 1            | 0.0009077        | 0.999773         |
| GO:0006869 | 54                  | 8          | 0.30343      | 1            | 0.0004038        | 1                |
| GO:0006886 | 484                 | 184        | 1            | 0            | 1                | 1.54E-11         |
| GO:0006904 | 38                  | 19         | 1            | 0.002224     | 0.999842         | 0.0005396        |
| GO:0006913 | 135                 | 52         | 1            | 0.000841     | 0.999719         | 0.0005992        |
| GO:0007186 | 954                 | 95         | 0            | 1            | 1.22E-30         | 1                |
| GO:0007606 | 136                 | 0          | 0            | 1            | 2.91E-17         | 1                |
| GO:0009060 | 92                  | 25         | 1            | 1            | 4.62E-06         | 1                |
| GO:0015031 | 671                 | 257        | 1            | 0            | 0.999985         | 3.00E-05         |
| GO:0015074 | 215                 | 97         | 1            | 0            | 1                | 1.91E-11         |
| GO:0015986 | 171                 | 73         | 1            | 0            | 1                | 9.44E-08         |
| GO:0016042 | 116                 | 6          | 0            | 1            | 5.56E-06         | 0.999999         |
| GO:0016043 | 1639                | 577        | 1            | 0            | 1                | 6.76E-19         |
| GO:0016070 | 2662                | 633        | 1            | 1            | 0.999955         | 0.0001856        |
| GO:0016071 | 167                 | 79         | 1            | 0            | 1                | 3.94E-12         |
| GO:0016192 | 302                 | 128        | 1            | 0            | 1                | 3.43E-07         |
| GO:0019538 | 5765                | 1618       | 1            | 0            | 1                | 1.07E-13         |
| GO:0043170 | 10151               | 2743       | 1            | 0            | 1                | 1.13E-11         |
| GO:0043687 | 2230                | 497        | 0.04649      | 1            | 0.999615         | 0.0006433        |
| GO:0044267 | 5610                | 1538       | 1            | 0            | 1                | 1.34E-06         |
| GO:0045941 | 19                  | 13         | 1            | 0.000519     | 0.999992         | 6.12E-05         |
| GO:0051246 | 108                 | 15         | 0.031657     | 1            | 3.99E-06         | 1                |
| GO:0051258 | 75                  | 39         | 1            | 0            | 1                | 1.45E-06         |

| <b>GO:0055114</b> | <b>146</b> | <b>12</b> | <b>0</b> | <b>1</b> | <b>4.08E-13</b> | <b>1</b>  |
|-------------------|------------|-----------|----------|----------|-----------------|-----------|
| GO:0000104        | 7          | 6         | 1        | 0.004813 | 0.999965        | 0.0008448 |
| GO:0001509        | 7          | 6         | 1        | 0.004813 | 0.999965        | 0.0008448 |
| GO:0001584        | 631        | 60        | 0        | 1        | 1.41E-17        | 1         |
| GO:0003676        | 6322       | 1653      | 1        | 0        | 1               | 2.89E-07  |
| GO:0003677        | 3223       | 769       | 1        | 0.336103 | 1               | 1.70E-18  |
| GO:0003700        | 1514       | 212       | 0        | 1        | 8.08E-20        | 1         |
| GO:0003707        | 506        | 10        | 0        | 1        | 1.28E-43        | 1         |
| GO:0003723        | 743        | 230       | 1        | 0        | 0.999797        | 0.0002855 |
| GO:0003735        | 635        | 245       | 1        | 0        | 1               | 5.92E-19  |
| GO:0003755        | 70         | 35        | 1        | 0        | 1               | 7.94E-07  |
| GO:0003887        | 199        | 20        | 0        | 1        | 1.58E-06        | 0.999999  |
| GO:0003899        | 114        | 51        | 1        | 0        | 0.999998        | 5.67E-06  |
| GO:0003918        | 21         | 12        | 1        | 0.004167 | 0.999844        | 0.0007829 |
| GO:0003924        | 273        | 112       | 1        | 0        | 1               | 2.53E-11  |
| GO:0004190        | 227        | 87        | 1        | 0        | 0.999871        | 0.0002332 |
| GO:0004194        | 28         | 19        | 1        | 0        | 1               | 5.84E-07  |
| GO:0004219        | 7          | 6         | 1        | 0.004813 | 0.999965        | 0.0008448 |
| GO:0004252        | 207        | 34        | 0.04989  | 1        | 0.0007225       | 0.999675  |
| GO:0004298        | 71         | 35        | 1        | 0        | 1               | 1.22E-06  |
| GO:0004386        | 435        | 181       | 1        | 0        | 0.999967        | 7.74E-05  |
| GO:0004518        | 538        | 91        | 0.000819 | 1        | 0.999834        | 0.0005776 |
| GO:0004531        | 134        | 0         | 0        | 1        | 4.97E-16        | 1         |
| GO:0004605        | 7          | 6         | 1        | 0.004813 | 0.999965        | 0.0008448 |
| GO:0004623        | 55         | 2         | 0.000287 | 1        | 8.13E-05        | 0.999991  |
| GO:0004672        | 1571       | 324       | 0.040236 | 1        | 1.02E-09        | 1         |
| GO:0004722        | 33         | 17        | 1        | 0.001748 | 0.999911        | 0.0003477 |
| GO:0004725        | 240        | 34        | 0.001416 | 1        | 0.0003776       | 0.999801  |
| GO:0004730        | 15         | 10        | 1        | 0.001935 | 0.999948        | 0.0003958 |
| GO:0004888        | 1186       | 123       | 0        | 1        | 6.97E-20        | 1         |
| GO:0005097        | 88         | 34        | 1        | 0.003947 | 0.999665        | 0.0007515 |
| GO:0005179        | 85         | 4         | 0        | 1        | 4.00E-06        | 1         |
| GO:0005215        | 2446       | 577       | 1        | 1        | 4.54E-05        | 0.999972  |
| GO:0005230        | 277        | 38        | 0.00021  | 1        | 0.000469        | 0.999762  |
| GO:0005267        | 275        | 34        | 0        | 1        | 2.21E-05        | 0.999995  |
| GO:0005272        | 67         | 2         | 0        | 1        | 5.05E-06        | 1         |
| GO:0005351        | 56         | 27        | 1        | 0.000258 | 0.99999         | 3.27E-05  |
| GO:0005516        | 32         | 0         | 0.000832 | 1        | 0.0002255       | 1         |
| GO:0005524        | 3542       | 1029      | 1        | 0        | 1               | 5.59E-19  |
| GO:0005525        | 653        | 215       | 1        | 0        | 1               | 3.92E-09  |
| GO:0005529        | 453        | 22        | 0        | 1        | 6.84E-27        | 1         |
| GO:0008026        | 313        | 133       | 1        | 0        | 1               | 7.97E-15  |
| GO:0008094        | 90         | 42        | 1        | 0        | 1               | 4.10E-07  |
| GO:0008137        | 62         | 27        | 1        | 0.00151  | 0.999898        | 0.000282  |
| GO:0008235        | 132        | 43        | 1        | 0.029493 | 0.999989        | 7.52E-05  |
| GO:0008270        | 3672       | 739       | 0        | 1        | 2.34E-06        | 0.999998  |
| GO:0008312        | 32         | 16        | 1        | 0.004167 | 0.999786        | 0.0007925 |
| GO:0008375        | 63         | 6         | 0.019766 | 1        | 0.0005791       | 0.999953  |
| GO:0008378        | 47         | 1         | 0.000205 | 1        | 6.63E-05        | 0.999996  |
| GO:0008408        | 201        | 16        | 0        | 1        | 5.72E-14        | 1         |
| GO:0008450        | 6          | 6         | 1        | 0.000746 | 1               | 0.0001504 |
| GO:0008553        | 9          | 7         | 1        | 0.004403 | 0.999943        | 0.0007963 |
| GO:0008565        | 187        | 103       | 1        | 0        | 1               | 1.27E-16  |
| GO:0015077        | 254        | 99        | 1        | 0        | 0.999965        | 0.0008448 |

|            |      |     |          |          |           |           |
|------------|------|-----|----------|----------|-----------|-----------|
| GO:0015450 | 26   | 16  | 1        | 0.000276 | 0.999995  | 2.96E-05  |
| GO:0016298 | 173  | 18  | 0        | 1        | 0.0003812 | 1         |
| GO:0016651 | 99   | 46  | 1        | 0        | 1         | 2.83E-06  |
| GO:0016747 | 291  | 59  | 1        | 1        | 8.93E-08  | 1         |
| GO:0016758 | 437  | 46  | 0        | 1        | 1.17E-11  | 1         |
| GO:0016773 | 1810 | 385 | 0.14273  | 1        | 0.0009827 | 0.999726  |
| GO:0016844 | 8    | 7   | 1        | 0.001248 | 0.999992  | 0.0002214 |
| GO:0016986 | 18   | 11  | 1        | 0.002733 | 0.9999    | 0.0005978 |
| GO:0017111 | 1291 | 514 | 1        | 0        | 0.999998  | 5.12E-06  |
| GO:0030414 | 308  | 58  | 0.188443 | 1        | 0.0002825 | 0.999979  |
| GO:0042302 | 323  | 27  | 0        | 1        | 2.34E-12  | 1         |
| GO:0043565 | 1215 | 153 | 0        | 1        | 2.64E-21  | 1         |
| GO:0046933 | 136  | 70  | 1        | 0        | 1         | 5.22E-13  |
| GO:0046961 | 140  | 70  | 1        | 0        | 1         | 3.15E-12  |
| GO:0046983 | 221  | 27  | 0        | 1        | 5.77E-06  | 0.999998  |
| GO:0050661 | 29   | 17  | 1        | 0.000313 | 0.999992  | 4.06E-05  |
| GO:0051082 | 187  | 71  | 1        | 3.70E-05 | 0.999998  | 3.18E-06  |
| GO:0051536 | 116  | 44  | 1        | 0.001215 | 0.999573  | 0.0009976 |

---

**Supplementary Table 12.** Gene Ontology functions significantly enriched (at  $P < 0.01$ ) or depleted when the 64 orthologous groups conserved among the three parasitic nematodes were compared to their complete proteomes. Of the total of 20,208 GO ids in Biological processes 81 are associated with this group, and of the 27,935 Molecular Function GO ids 101 are associated with this group. FDR, false discovery rate. Biological Processes GOs are in blue, Molecular Function GOs are in red.

| <b>GO Id</b> | <b>GO in all 4 species</b> | <b>Go in NOGs</b> | <b>FDR depleted</b> | <b>FDR enriched</b> | <b>P value depleted</b> | <b>P value enriched</b> |
|--------------|----------------------------|-------------------|---------------------|---------------------|-------------------------|-------------------------|
| GO:0000059   | 23                         | 3                 | 1                   | 0.001844            | 0.999998                | 0.000104                |
| GO:0006278   | 67                         | 10                | 1                   | 0                   | 1                       | 1.24E-13                |
| GO:0006508   | 1651                       | 22                | 1                   | 0                   | 0.999998                | 9.86E-06                |
| GO:0007179   | 29                         | 4                 | 1                   | 0.000237            | 1                       | 5.27E-06                |
| GO:0009439   | 4                          | 2                 | 1                   | 0.001756            | 1                       | 9.47E-05                |
| GO:0015074   | 215                        | 18                | 1                   | 0                   | 1                       | 3.76E-19                |
| GO:0003677   | 3223                       | 29                | 1                   | 0.0001              | 1                       | 1.03E-07                |
| GO:0003723   | 743                        | 20                | 1                   | 0                   | 1                       | 2.16E-12                |
| GO:0003964   | 67                         | 10                | 1                   | 0                   | 1                       | 5.05E-14                |
| GO:0004190   | 227                        | 16                | 1                   | 0                   | 1                       | 1.84E-16                |
| GO:0004287   | 4                          | 2                 | 1                   | 0.00261             | 1                       | 7.73E-05                |
| GO:0004462   | 3                          | 2                 | 1                   | 0.001145            | 1                       | 3.87E-05                |
| GO:0004525   | 16                         | 3                 | 1                   | 0.000987            | 1                       | 2.48E-05                |
| GO:0005524   | 3542                       | 2                 | 0.000146            | 1                   | 0.000135                | 0.999983                |
| GO:0008824   | 4                          | 2                 | 1                   | 0.00261             | 1                       | 7.73E-05                |

**Supplementary Table 13.** KEGG pathways mapping for the four nematodes under study (Kegg v.46 was used and the top hit better than 1e-010 was considered).

| Pathway name                               | KO in pathway | Represented KO in nemas | Conserved KO in all nemas | # Genes |      |      |      |
|--------------------------------------------|---------------|-------------------------|---------------------------|---------|------|------|------|
|                                            |               |                         |                           | Ce      | Mi   | Bm   | Ts   |
| <b>1. Metabolism</b>                       | 2258          | 785                     | 337                       | 2480    | 1822 | 1132 | 1069 |
| <b>1.1 Carbohydrate Metabolism</b>         | 550           | 192                     | 92                        | 626     | 499  | 294  | 252  |
| Glycolysis / Gluconeogenesis               | 55            | 25                      | 17                        | 78      | 66   | 57   | 34   |
| Citrate cycle (TCA cycle)                  | 50            | 25                      | 16                        | 50      | 42   | 42   | 31   |
| Pentose phosphate pathway                  | 42            | 18                      | 12                        | 28      | 28   | 19   | 20   |
| Pentose and glucuronate interconversions   | 41            | 10                      | 4                         | 104     | 101  | 14   | 9    |
| Fructose and mannose metabolism            | 52            | 21                      | 14                        | 97      | 64   | 44   | 37   |
| Galactose metabolism                       | 38            | 14                      | 6                         | 38      | 33   | 24   | 18   |
| Ascorbate and aldarate metabolism          | 24            | 4                       | 2                         | 10      | 7    | 2    | 3    |
| Starch and sucrose metabolism              | 68            | 28                      | 15                        | 193     | 164  | 56   | 37   |
| Aminosugars metabolism                     | 38            | 15                      | 10                        | 78      | 45   | 35   | 28   |
| Nucleotide sugars metabolism               | 20            | 6                       | 3                         | 17      | 14   | 10   | 3    |
| Pyruvate metabolism                        | 67            | 23                      | 12                        | 62      | 45   | 41   | 26   |
| Glyoxylate and dicarboxylate metabolism    | 57            | 17                      | 3                         | 21      | 22   | 8    | 8    |
| Propanoate metabolism                      | 59            | 22                      | 6                         | 54      | 31   | 19   | 30   |
| Butanoate metabolism                       | 66            | 21                      | 7                         | 67      | 45   | 34   | 28   |
| Inositol metabolism                        | 9             | 3                       | 1                         | 3       | 3    | 1    | 12   |
| Inositol phosphate metabolism              | 39            | 24                      | 12                        | 60      | 44   | 44   | 60   |
| <b>1.2 Energy Metabolism</b>               | 408           | 131                     | 71                        | 235     | 210  | 144  | 123  |
| Oxidative phosphorylation                  | 202           | 96                      | 52                        | 138     | 117  | 91   | 70   |
| Reductive carboxylate cycle (CO2 fixation) | 32            | 9                       | 6                         | 17      | 15   | 13   | 8    |
| Methane metabolism                         | 49            | 6                       | 2                         | 25      | 20   | 11   | 13   |
| Nitrogen metabolism                        | 107           | 16                      | 10                        | 41      | 54   | 27   | 27   |
| Sulfur metabolism                          | 27            | 5                       | 1                         | 14      | 4    | 3    | 5    |
| <b>1.3 Lipid Metabolism</b>                | 325           | 144                     | 52                        | 710     | 380  | 218  | 199  |
| Fatty acid biosynthesis                    | 26            | 7                       | 3                         | 32      | 11   | 10   | 10   |
| Fatty acid elongation in mitochondria      | 8             | 8                       | 4                         | 19      | 17   | 11   | 8    |
| Fatty acid metabolism                      | 32            | 21                      | 10                        | 152     | 71   | 30   | 26   |
| Synthesis and degradation of ketone bodies | 7             | 6                       | 1                         | 6       | 8    | 3    | 4    |
| Biosynthesis of steroids                   | 47            | 16                      | 4                         | 18      | 14   | 9    | 7    |
| Bile acid biosynthesis                     | 22            | 10                      | 5                         | 54      | 32   | 16   | 21   |
| Androgen and estrogen metabolism           | 19            | 7                       | 2                         | 109     | 72   | 19   | 22   |
| Glycerolipid metabolism                    | 41            | 15                      | 6                         | 84      | 60   | 32   | 34   |
| Glycerophospholipid metabolism             | 58            | 32                      | 15                        | 185     | 85   | 69   | 64   |
| Ether lipid metabolism                     | 12            | 10                      | 5                         | 51      | 38   | 24   | 26   |
| Sphingolipid metabolism                    | 31            | 19                      | 8                         | 55      | 44   | 23   | 19   |
| Arachidonic acid metabolism                | 28            | 11                      | 3                         | 57      | 28   | 12   | 13   |
| Linoleic acid metabolism                   | 12            | 6                       | 2                         | 45      | 24   | 12   | 23   |
| alpha-Linolenic acid metabolism            | 14            | 3                       | 2                         | 23      | 14   | 7    | 11   |
| Biosynthesis of unsaturated fatty acids    | 28            | 12                      | 4                         | 59      | 17   | 18   | 13   |
| <b>1.4 Nucleotide Metabolism</b>           | 174           | 78                      | 35                        | 306     | 294  | 182  | 182  |
| Purine metabolism                          | 134           | 54                      | 26                        | 278     | 260  | 158  | 165  |
| Pyrimidine metabolism                      | 76            | 35                      | 16                        | 56      | 69   | 36   | 42   |
| <b>1.5 Amino Acid Metabolism</b>           | 484           | 188                     | 75                        | 607     | 430  | 250  | 266  |
| Glutamate metabolism                       | 39            | 22                      | 13                        | 46      | 47   | 29   | 35   |
| Alanine and aspartate metabolism           | 42            | 19                      | 9                         | 37      | 37   | 18   | 14   |
| Glycine, serine and threonine metabolism   | 64            | 33                      | 10                        | 92      | 51   | 36   | 38   |
| Methionine metabolism                      | 38            | 14                      | 7                         | 31      | 21   | 15   | 18   |

|                                                                  |            |           |           |            |            |            |            |
|------------------------------------------------------------------|------------|-----------|-----------|------------|------------|------------|------------|
| Cysteine metabolism                                              | 21         | 6         | 2         | 27         | 7          | 5          | 5          |
| Valine, leucine and isoleucine degradation                       | 51         | 30        | 8         | 71         | 51         | 19         | 32         |
| Valine, leucine and isoleucine biosynthesis                      | 20         | 8         | 3         | 21         | 11         | 16         | 15         |
| Lysine degradation                                               | 45         | 17        | 8         | 76         | 57         | 39         | 30         |
| Arginine and proline metabolism                                  | 53         | 14        | 10        | 46         | 36         | 19         | 38         |
| Histidine metabolism                                             | 35         | 11        | 4         | 47         | 37         | 20         | 23         |
| Tyrosine metabolism                                              | 54         | 22        | 10        | 154        | 94         | 63         | 53         |
| Phenylalanine metabolism                                         | 38         | 11        | 7         | 120        | 59         | 43         | 33         |
| Tryptophan metabolism                                            | 52         | 27        | 9         | 111        | 76         | 24         | 29         |
| Phenylalanine, tyrosine and tryptophan biosynthesis              | 49         | 7         | 4         | 16         | 18         | 6          | 7          |
| <b>1.6 Metabolism of Other Amino Acids</b>                       | <b>126</b> | <b>55</b> | <b>26</b> | <b>222</b> | <b>119</b> | <b>73</b>  | <b>76</b>  |
| beta-Alanine metabolism                                          | 24         | 15        | 4         | 39         | 32         | 12         | 10         |
| Taurine and hypotaurine metabolism                               | 15         | 4         | 2         | 12         | 9          | 4          | 3          |
| Aminophosphonate metabolism                                      | 13         | 5         | 2         | 32         | 23         | 19         | 21         |
| Selenoamino acid metabolism                                      | 23         | 12        | 5         | 64         | 28         | 28         | 31         |
| Cyanoamino acid metabolism                                       | 13         | 6         | 4         | 20         | 14         | 6          | 6          |
| D-Glutamine and D-glutamate metabolism                           | 6          | 2         | 2         | 4          | 5          | 3          | 9          |
| D-Arginine and D-ornithine metabolism                            | 2          | 1         | 0         | 4          | 1          | 0          | 0          |
| Glutathione metabolism                                           | 38         | 16        | 13        | 98         | 45         | 26         | 20         |
| <b>1.7 Glycan Biosynthesis and Metabolism</b>                    | <b>160</b> | <b>83</b> | <b>30</b> | <b>163</b> | <b>153</b> | <b>95</b>  | <b>89</b>  |
| N-Glycan biosynthesis                                            | 34         | 27        | 11        | 44         | 70         | 34         | 33         |
| N-Glycan degradation                                             | 8          | 7         | 4         | 12         | 15         | 10         | 9          |
| O-Glycan biosynthesis                                            | 13         | 7         | 2         | 48         | 23         | 13         | 12         |
| Chondroitin sulfate biosynthesis                                 | 19         | 7         | 2         | 13         | 5          | 5          | 5          |
| Heparan sulfate biosynthesis                                     | 18         | 10        | 3         | 6          | 8          | 9          | 10         |
| Keratan sulfate biosynthesis                                     | 13         | 5         | 2         | 11         | 28         | 5          | 3          |
| Glycosaminoglycan degradation                                    | 14         | 6         | 1         | 10         | 10         | 5          | 3          |
| Peptidoglycan biosynthesis                                       | 24         | 1         | 1         | 7          | 9          | 5          | 4          |
| Glycosylphosphatidylinositol(GPI)-anchor biosynthesis            | 24         | 17        | 6         | 18         | 15         | 14         | 15         |
| <b>1.8 Biosynthesis of Polyketides and Nonribosomal Peptides</b> | <b>4</b>   | <b>2</b>  | <b>1</b>  | <b>5</b>   | <b>6</b>   | <b>4</b>   | <b>1</b>   |
| Polyketide sugar unit biosynthesis                               | 4          | 2         | 1         | 5          | 6          | 4          | 1          |
| <b>1.9 Metabolism of Cofactors and Vitamins</b>                  | <b>301</b> | <b>91</b> | <b>31</b> | <b>392</b> | <b>298</b> | <b>174</b> | <b>185</b> |
| Thiamine metabolism                                              | 20         | 5         | 4         | 26         | 17         | 16         | 15         |
| Riboflavin metabolism                                            | 18         | 7         | 4         | 55         | 56         | 29         | 21         |
| Vitamin B6 metabolism                                            | 14         | 4         | 0         | 5          | 1          | 3          | 3          |
| Nicotinate and nicotinamide metabolism                           | 30         | 15        | 3         | 29         | 16         | 11         | 17         |
| Pantothenate and CoA biosynthesis                                | 24         | 13        | 6         | 20         | 22         | 11         | 8          |
| Biotin metabolism                                                | 11         | 6         | 1         | 27         | 23         | 17         | 8          |
| Lipoic acid metabolism                                           | 4          | 3         | 2         | 5          | 6          | 4          | 3          |
| Folate biosynthesis                                              | 53         | 8         | 4         | 108        | 83         | 60         | 84         |
| One carbon pool by folate                                        | 22         | 14        | 4         | 19         | 19         | 8          | 13         |
| Retinol metabolism                                               | 29         | 10        | 3         | 104        | 61         | 14         | 8          |
| Porphyrin and chlorophyll metabolism                             | 83         | 11        | 5         | 91         | 63         | 17         | 13         |
| <b>1.10 Biosynthesis of Secondary Metabolites</b>                | <b>55</b>  | <b>25</b> | <b>13</b> | <b>234</b> | <b>115</b> | <b>59</b>  | <b>47</b>  |
| Terpenoid biosynthesis                                           | 8          | 5         | 3         | 10         | 5          | 5          | 2          |
| Limonene and pinene degradation                                  | 21         | 11        | 5         | 140        | 43         | 34         | 32         |
| Alkaloid biosynthesis I                                          | 13         | 5         | 3         | 20         | 38         | 10         | 4          |
| Alkaloid biosynthesis II                                         | 8          | 3         | 3         | 63         | 30         | 12         | 10         |
| Caffeine metabolism                                              | 6          | 2         | 0         | 2          | 0          | 0          | 1          |
| <b>1.11 Xenobiotics Biodegradation and Metabolism</b>            | <b>178</b> | <b>61</b> | <b>27</b> | <b>548</b> | <b>249</b> | <b>125</b> | <b>119</b> |
| Caprolactam degradation                                          | 13         | 6         | 2         | 22         | 12         | 12         | 8          |

|                                              |    |    |   |     |    |    |    |
|----------------------------------------------|----|----|---|-----|----|----|----|
| gamma-Hexachlorocyclohexane degradation      | 23 | 9  | 4 | 128 | 57 | 20 | 21 |
| 3-Chloroacrylic acid degradation             | 4  | 2  | 2 | 16  | 7  | 5  | 4  |
| Styrene degradation                          | 19 | 5  | 2 | 9   | 11 | 3  | 3  |
| Naphthalene and anthracene degradation       | 12 | 4  | 3 | 54  | 29 | 18 | 23 |
| Benzoate degradation via CoA ligation        | 67 | 13 | 6 | 119 | 40 | 36 | 34 |
| Atrazine degradation                         | 12 | 1  | 1 | 3   | 1  | 3  | 1  |
| Bisphenol A degradation                      | 7  | 4  | 2 | 40  | 14 | 10 | 15 |
| 1- and 2-Methylnaphthalene degradation       | 13 | 7  | 4 | 106 | 32 | 34 | 25 |
| Geraniol degradation                         | 7  | 5  | 3 | 27  | 16 | 13 | 5  |
| Metabolism of xenobiotics by cytochrome P450 | 15 | 9  | 3 | 154 | 66 | 11 | 9  |
| Drug metabolism - cytochrome P450            | 14 | 9  | 4 | 160 | 66 | 12 | 9  |
| Drug metabolism - other enzymes              | 22 | 18 | 9 | 151 | 89 | 22 | 21 |

---

### III – Supplementary Note

#### Phylogenetic relationship among *T. spiralis*, other nematodes and non-nematode species.

Nematodes are believed to have originated from an ecdysozoan ancestor on the order of 650-1200 million years ago<sup>3,4</sup>, as free-living marine species and subsequently adapted independently to terrestrial environments at least sixteen times<sup>5</sup> and to parasitism at least eleven times<sup>4</sup>. Within the nested Nematoda phylogeny (**Supplementary Fig.1**; the trophic ecology of each of the 4 nematode species used in this study for pan-phylum analysis is indicated), the majority of intensively studied nematodes belong to three major crown clades; Rhabditina (e.g. *Caenorhabditis* spp., hookworms, strongylid parasites of livestock, *Heterorhabditis* spp.), Tylenchina (e.g. *Strongyloides* spp., and plant parasites such as root knot, cyst, and lesion nematodes), and Spirurina (e.g. parasites of vertebrates, such as ascarids, and filarial nematodes)<sup>6-7</sup>. Each of these clades is represented by one or more annotated genomes: Rhabditina – *Caenorhabditis elegans*<sup>8</sup>, *C. briggsae*<sup>9</sup>, and *Pristionchus pacificus*<sup>10</sup>; Tylenchina – *Meloidogyne incognita*<sup>11</sup> and *M. hapla*<sup>12</sup>; and Spirurina – *Brugia malayi*<sup>13</sup>. These major crown clades together form a monophyletic group, the terrestrial Rhabditida (formerly Secernentea), distinguished by the presence of a tail chemoreceptive sensillum, the phasmid. The Rhabditida and several clades of mostly free-living nematodes (e.g. Plectida, Monhysterida, Chromadorida) belong, in turn, to a deeper monophyletic group - the Chromadorea. Closer to the root of the nematode phylogeny are two clades, the Dorylaimia and the Enoplia that separated from other nematodes in the pre-cambrian. Historically, nematodes lacking sensilla (the Dorylaimia, Enoplia, and non-Secernentean Chromadorea) were classified as the clade Adenophorea, a grouping of mostly marine nematodes which are now proposed to be paraphyletic<sup>4</sup>. Along with marine species, the basal Dorylaimia clade includes several terrestrial parasites such as *Trichinella* spp. (Nematoda; Enoplea; Dorylaimia; Trichinellida; Trichinellidae), *Trichuris* spp. (whipworm parasites of humans and other mammals), Dorylaimida species (including viral-transmitting plant parasites such as the dagger nematode *Xiphinema index*, and *Mermis* spp. (insect parasites).

#### The life-cycle of *Trichinella spiralis*

The life cycle of *T. spiralis* (**Supplementary Fig. 2**) begins when an animal or person ingests muscle tissue containing encapsulated first stage muscle larvae (ML). The capsule dissolves during digestion in the stomach releasing the larvae which invade the columnar epithelium of the small intestine and migrate intracellularly<sup>14</sup>. Over 30 hours, the larvae molt four times, mature to the adult (Ad) stage, and begin mating. Each female can release upwards of 1,500 new born larvae (NBL) which penetrate the bloodstream and are distributed by general circulation throughout the body. A larva which reaches host striated skeletal muscle induces formation of a nurse cell where the worm may survive for the life of the host as an intracellular parasite. The radical transformation of a host differentiated muscle cell into a nurse cell occurs over several days and includes altered gene expression, loss of myofibrils, and cell cycle progression to G2/M<sup>15-16</sup>. *T. spiralis* excretory-secreted products are detected in the nurse cell including glycosylated proteins localized to the host cell nucleus<sup>17-21</sup>.

#### Sequencing, assembly and genome characteristics

A total of 3,347,411 GSSs, 149,088 fosmid ends and 40,379 BAC ends were assembled using PCAP, as previously described [19]. 85.5% of the sequences (2,859,616 GSSs, 125,862 fosmid ends, 37,271 BAC ends) were assembled into 11,146 contigs (9,267 of which are with min size of 500bp and submitted to GenBank; the 1,086 contigs smaller than 500bp. Many unassembled reads and short contigs were identified as mitochondrial, and assembled into 5 major contigs totaling 14.6 kb. Gene assessment only identifies 12 of 13 MT genes where NAD4L is missing.

All contigs, including the mitochondrion originated contigs are available at <http://genome.wustl.edu/pub/organism/Invertebrates/>, the mt originated contigs were reassembled and the mt genome submitted to GenBank), and subsequently into 8,795 supercontigs (**Supplementary Table 1**). Approximately 35 fold coverage of the nuclear genome was obtained. Several gene prediction algorithms, trained using *C. elegans* and *B. malayi*, and *T. spiralis* manually curated gene structures were used to generate the single set of gene predictions (version 1), which were used for subsequent analysis.

The total Q20 length of all sequences input to PCAP was 2,469,785,966 bp. The sources of Q20 sequences included: 2,238,615,150 bases of GSS sequence; 98,729,078 bases of fosmid ends; and 132,441,738 bases of BAC ends. The previously estimated size of the *T. spiralis* genome was 71.3 Mb. Therefore, the sequences obtained achieved an anticipated coverage of approximately 34.6X.

The total length of the scaffolds/supercontigs (which include spacers based on the expected separation of contigs joined by read pairs of roughly known size) is 64.3 Mb. This assembled genome size was smaller than estimates that were



published earlier<sup>22</sup>, but was similar to recent genome size estimate of 1C = 71.3 +/- 1.2 Mb, based on flow sorted nuclei, stained with propidium iodide<sup>23-24</sup>. The average scaffold/supercontig length is 7,314 bp and the largest scaffold/supercontig is 9,955,697 bp. The N50 length of the scaffolds/supercontigs is 1,785,481 bp and the N50 number is 10. There were 8,461 orphan contigs (an orphan contig is the sole member of a scaffold/supercontig), and 334 scaffolds/supercontigs with 2 or more members. The total length of all orphan contigs was 9,788,023 bp, with the remainder of the 64.3 Mb being made up of scaffolds/supercontigs with multiple members.

### **Integration of genome sequences into a physical map**

A physical map was constructed for *T. spiralis* using 26,784 clones. Of those clones 23,755 had usable fingerprints. 3,029 clones were not used. 19,463 of those clones with usable fingerprints were in contigs, and 4,292 were 'singleton' clones. The clones resided in a total of 49 unique contigs with the following number of clones per contig: 22 contigs with over 200 clones each, 10 contigs with 100-200 clones, 5 with 50-100 clones, 7 with 25-50 clones per contig, 2 with 10-25 and 3 contigs with 3-9 clones. Using this physical map, we were able to construct 9 ultracontigs comprised of 69 large supercontigs. Supercontigs were aggregated into ultracontigs when each supercontig had  $\geq 6$  BAC end sequences from fingerprinted clones which were properly arranged. Supercontigs with BAC end sequences in topologically problematic alignments were discarded. 103 supercontigs from our assembly had 6 or more BAC end sequences from fingerprinted clones, but 34 of them had to be discarded due to problematic topology, leaving 69 that could be arranged into ultracontigs. Those 69 supercontigs represent 48,574,849 bp of sequence out of the total 64,330,920 bp of all supercontigs. Thus 75.5% of the sequence was ordered into ultracontigs.

### **Repeat content and gene finding**

Assessment of the repeat content in the *T. spiralis* genome was aided by a custom-built repeat library. A total of 18% of the genome occurred as repeat sequences (10,736,179 bp), of which 5.5% were low complexity and simple repeats (3,235,623 bp) 2.2% were identifiable mobile elements (1,276,787 bp), e.g. transposable elements based on similarities to the coding sequences in known transposons in other species, and 10.5% were species-specific and highly divergent repeats (6,223,769 bp). A total of 4.8% of the repeats were further characterized based on repeats represented in RepBase<sup>(25)</sup>; release 12.09). We masked the repeats and called genes using a logical, hierarchical approach. The origin and numbers of genes in the final gene set by predictor/model is: SNAP (trained with *B. malayi*) 8398, SNAP (trained with *C. elegans*) 2005, EANNOT (EN) 911, FgenesH (trained with *C. elegans*) 4494 genes. Based on the identification of the core eukaryotic genes (CEGs; <http://bioinformatics.oxfordjournals.org/content/23/9/1061.short>) we have identified 91.5% of the *T. spiralis* genes.

### **Genomic analysis to identify possible *T. spiralis* operons**

Many nematode genes are organized in operons in genomes from diverse species. Expression of those genes is achieved along with the *trans*-splicing of short, spliced leader (SL) RNAs onto the 5' ends of mRNAs. Genes in the same operon also tend to have short intergenic spacing. All nematode species so far investigated utilize a characteristic, conserved spliced leader, SL1, on many mRNAs and then SL1-variant sequences that are added onto and appear to help resolve mRNAs from downstream genes in operons. These characteristics were utilized to assess potential operons in the *T. spiralis* genome. Genome organization was considered first:

1. Among the total of 15,808 *T. spiralis* genes, an estimated 5,800 have apparent orthologs in *C. elegans*, which were used to facilitate this analysis.
2. Analysis of approximately 8,000 supercontigs identified an estimated 12,000 neighboring gene pairs from the same strand in the *T. spiralis* assembly;
3. A total of 1,214 neighboring *T. spiralis* pairs have *C. elegans* orthologs for both neighboring *T. spiralis* genes;
4. Without any restraints on the length of intergenic regions, a total of only 16 *T. spiralis* neighboring pairs have their two *C. elegans* orthologs in a same operon in *C. elegans* (from a total of 1,138 *C. elegans* operons containing approximately 2,800 genes). The distance between genes in these 16 pairs ranged from 9 bp to 20 kb. This analysis provided no clear evidence for the occurrence of operons in the *T. spiralis* genome. Also, the smallest distance between *C. elegans* genes, has been reported as '0' where the 2 genes were on the same strand and the 5' UTR of the second gene started at the same position as the end of 3' UTR of the first gene.

This approach did not uncover evidence for the general conservation of operonic gene constituents across the Nematoda, but does not exclude that operon organization is a genomic feature of the basal nematode *T. spiralis*. Intergenic-spacing could provide leads on this issue.

Spliced leader sequences were considered in published reports. Although a canonical SL1 sequence was not detected in the genome of *T. spiralis*, at least 15 distinct spliced leaders, encoded by at least 19 SL RNA genes, have been described<sup>26</sup>. The individual spliced leaders vary both in size and primary sequence, showing a much higher degree of diversity compared to other known *trans*-spliced leaders. These observations indicate that the use of spliced leader *trans*-splicing was an early characteristic in the Nematoda, and that the canonical spliced leader, SL1, found in *C. elegans*, evolved after the divergence of the major nematode clades. Nevertheless, the relationship between use of spliced leader addition and occurrence of operons in *T. spiralis* requires further clarification.

### **Alignment of *T. spiralis* genes, ESTs, cDNAs and the genome:**

In total, 7,251 *T. spiralis* proteins (45%) shared homology to known proteins (cut-off e-05). For this protein search an extensive collection of proteins was built, containing all the proteins in the NR division of GenBank which was supplemented with proteins derived from nematode EST contigs ([www.nematode.net](http://www.nematode.net)). Work by our laboratory and others have generated the vast majority of sequences currently available for many parasites from the phylum Nematoda as expressed sequence tags (ESTs) and genome survey sequences (GSSs). For example, transcriptomes of 38 nematode species, 32 of which are parasites of vertebrates or plants, have been sampled to generate over 510,000 ESTs. However, putative nematode coding sequences among these ESTs and GSSs have never been explored systematically and have not been included in the NR.

There are 25,268 ESTs in dbEST of GenBank (as of 09/16/2008), totaling 12,788,240 bp. After removal of vector, poly-A, and low-complexity sequences, 25,083 ESTs (12,626,252 bp) were used in the BLAT analysis under default settings. BLAT results were further processed with pslReps to identify only highly confidence mappings with an empirical set of parameters for mRNA/genome mapping within the same species (-minAli=0.96 -nearTop=0.005). In summary, approximately 75% of the ESTs were mapped back to the *T. spiralis* gene set with high confidence, and the mapped regions account for approximately 57% of all the EST length. A total of 5,450 *T. spiralis* genes, 33.8% of all the 15,808 predicted gene models, have EST support. However, each EST was mapped to an average of 1.5 gene models. Using more stringent criteria, i.e. allowing a single mapping with the best high stringency nucleotide match, 4,688 loci were identified (29% of the total gene set).

The percentage of non-matching ESTs (**Supplementary Fig. 3**) indicates that the mappings are indeed high quality, in that 84% of all the EST-cDNA mappings have non-match ratios (defined as non-match bases/total bases of a mapped regions) of less than 0.5%. As expected, the percentage of query coverage is more dispersed. A total of 38.5% of all the EST-cDNA mappings cover less than 50% of the EST length (not including the UTRs). Such “short” coverage can contribute to mapping across multiple genes, although some of these mapping may be accurate if the ESTs include unspliced intronic or UTR sequences. For future use of these data, investigators might incorporate an empirical cutoff of coverage.

### **Amino Acid frequencies of *T. spiralis* and other nematode and non-nematode species.**

The amino acid (AA) composition of predicted proteins in *T. spiralis* is similar to that observed in other nematodes and organisms where leucine (Leu) is the most common (9% of all codons) and tryptophan (Trp) the least common (1%). On average, seven AAs contribute more than 6% each to total AA content, confirming previous transcriptomic data<sup>27</sup>. These same AA are most common in other nematodes as well (**Supplementary Table 2**).

### **Generation of orthologous protein families**

OrthoMCL<sup>28</sup> was used to predict orthologous groups of proteins among species to enable studies on gene/protein evolution and identification of taxonomically restricted sequences. Proteins were grouped based on the Markov Cluster algorithm to predict orthologs and paralogs. Complete proteomes were analyzed for four nematode species that span the Nematoda; the non-parasitic *C. elegans* (20,140 proteins), the plant parasitic *M. incognita* (19,212 proteins), the human filarial parasite *B. malayi* (11,407 proteins), the zoonotic basal nematode *T. spiralis* (15,808); and two outgroups, the arthropod *Drosophila melanogaster* (14,144 proteins) and the yeast *Saccharomyces cerevisiae* (6,696 proteins). Collectively these proteins were grouped into 12,163 orthologous groups (**Supplementary Table 3**).

### **Gene duplication and deletion based on TribeMCL grouping**

The tree used to map the protein family and protein events is based on amino acid substitutions of a single member per core species orthologous families. The consensus tree is based on a total of 328 trees, constructed for each of the 328 single copy universal orthologous groups. The support for the tree was very strong for most

of the branches ((Dme:100.0,Yea:100.0,(Tsp:100.0,(Bma:100.0,(Min:100.0,Cel:100.0):35.0):77.0):50.0)). Gene duplication and deletion analysis was investigated using both, TribeMCL (<http://micans.org/mcl/>) and OrthoMCL<sup>28</sup>, to provide independent assessment of associations. These two methods, each used with default parameters, produced similar numbers of inter- and intraspecific groups: *T. spiralis* singletons, 33% or 32%; intra-specific families, 26% or 28%; and inter-specific families, 41% or 40%, respectively. The numbers of duplication and deletion events based on TribeMCL (data not shown) using the 1,147 families for which trees were successfully built (using tree reconciliation, from a total of 1,206 families) also revealed a higher number of events in nematodes compared to the arthropod representative, *Drosophila melanogaster*.

### ***Trichinella spiralis* specific gene (protein) family expansion**

Gene duplication and deletion analysis among the four nematode species identify specific genes that reflect either lineage or species-specific genome evolution. A noteworthy example is the DNase II-like protein family (D2L) that has undergone remarkable expansion in *T. spiralis* by comparison to the other species. The p43 protein is a ML-expressed D2L that predominates in excretory-secretory products, generates a strong host antibody response, and has been suggested as a vaccine candidate<sup>29</sup>. Our analysis of ESTs<sup>30</sup> revealed a much larger *d2l* gene family that displayed relatively restricted diversity of genes expressed by ML, whereas extensive diversity was observed among *d2l* ESTs expressed by NBL. No *d2l* gene expression was detected for in that analysis. We have now detected 125 *d2l* genes in the *T. spiralis* genome, which reflects a marked expansion by comparison to other nematodes including *C. elegans* (**Supplementary Fig. 4**). Nearly half of the *T. spiralis* D2L genes were categorized as encoding secretory proteins (SP). The D2L ESTs were especially prevalent from NBL libraries; seven to nine times the number found in ML and Ad. The *T. spiralis* *d2l* gene family is therefore uniquely large compared to other parasitic and non-parasitic nematodes. The greatest level of the D2L protein diversity defined as the expansion of the number of genes, is found in the NBL stage where the parasite undergoes migration through host tissue. By analogy to the ML p43-D2L protein, which has been investigated extensively<sup>29</sup>, other D2L proteins are likely to be released from ML and NBL where interactions with the host immune system are likely to occur. We hypothesize that the size and diversity of the D2L gene family is related to escape from host immune responses. The expression data coupled with the genomic inventory of *d2l* genes will provide tools necessary to test this hypothesis. While a role in digestion of host DNA to facilitate tissue migration has been suggested, the biochemical function of *T. spiralis* D2L proteins remains unknown. Preferential expansion of *T. spiralis* D2L genes resembles an expansion of cathepsin B-like cysteine (CBL) protease genes in the trichostrongylid parasite *Haemonchus contortus*<sup>31</sup> and several gene families in *B. malayi* (**Supplementary Table 4**). These gene expansions may provide important clues in host-parasite interactions and factors that figure decisively in evolution of nematode lineages.

### **Correlation among *T. spiralis* ultracontigs**

The linear arrangement of genes along a chromosome can have important ramifications for regulation of gene expression, and in nematodes the occurrence of operons provides a functional example. Common chromosomal coordinates also provides one line of information to assess gene orthology. The *T. spiralis* genome sequence provided anchor points to assess this process across the phylum. *T. spiralis* genes organized on the six longest ultracontigs were compared to the predicted orthologs from *C. elegans*; non-random distribution was observed in several nematode species. In addition, the correlation supporting macrosynteny was improved when the orthologs from the *C. elegans* X chromosome were excluded from the analysis. This effect may reflect the different karyotypes between the two species (*C. elegans* has 2n=12, and *T. spiralis* has 2n=6 for the females and 2n=5 for the males). There was a strong correlation among *T. spiralis* ultracontigs (UC2/UC5=0.76; UC1/UC4=0.95; UC6/UC9=0.99), that was even higher when the X chromosome was excluded (UC2/UC5=0.97; UC1/UC4=0.97; UC6/UC9=0.99).

### **Ancestral orthologous regions**

Our approach used a basic strategy in building homology maps, which uses exons that are orthologous in multiple genomes as map "anchors" (<http://www.biostat.wisc.edu/~cdewey/mercator/>). While the number of orthologous blocks maybe smaller than the real number due to the fragmented nature of two out of the three genomes (*C. elegans*, *B. malayi* and *T. spiralis*), the possible incorrect annotations are not likely to have significant alignments with other gene annotations therefore are not a problem. We identified 196 orthologous blocks (**Supplementary Table 7**). Among those identified, 155 were shared among *C. elegans* and *B. malayi* only; 5 were shared among *B. malayi* and *T. spiralis*, only. We also identified 36 segments that were shared among all three species and putatively defined as ancestral orthologous

segments. No segments were shared exclusively among *C. elegans* and *T. spiralis*. online). The genes pairs within the ancestral blocks accounted for ~50% of the genes in all segments for *C. elegans* and *B. malayi*, but 97% of all the genes in *T. spiralis*. The genes within the 36 ancestral blocks accounted for ~50% of the genes in all 196 blocks for *C. elegans* and *B. malayi* but as high as 97% of all the genes in *T. spiralis*. While 15% of the *C. elegans* operons had genes within the syntenic blocks, only 14 of the ancestral synteny blocks contained *C. elegans* genes organized into 26 *C. elegans* operons. This pattern was more pronounced in the syntenic blocks between *C. elegans* and *B. malayi*, where 68 syntenic blocks contained genes from 93 operons. Furthermore, over half of the ancestral syntenic blocks are located on chromosome III and IV. Overall, the ancestral syntenic blocks tended to be located in the center of the chromosomes compared to those restricted to any two species that were located predominantly on the chromosomal arms (**Supplementary Fig. 2b**).

**Other characteristics of scNOGs.** Available information, largely obtained from the *C. elegans* databases, supports the importance of NOGs in basic nematode functions (**Supplementary Table 9** contains annotation of the 274 NOGs, including the 85 scNOGs). Eighteen of the 85 scNOGs lacked homology to known proteins but did match IPR domains. As such, putative functions could only be inferred from information such as *C. elegans* RNAi phenotypes, anatomical expression and other annotations associated with *C. elegans*. For example, the *C. elegans* gene W08F4.6 encodes a novel protein having activity that is required for molting. It is expressed in hypodermal cells and in a single posterior neuron. We also evaluated InterPro (IPR) domains associated with scNOGs, and the remaining 67 scNOGs were collectively associated with 144 IPR domains. Five IPR domains for scNOGs from *T. spiralis* were statistically enriched compared to the IPR domains by comparison to the complete *T. spiralis* gene repertoire. Among the enriched IPRs were tetraspanin, Zinc finger C2H2 type, and calycin. Tetraspanin functions in the maintenance of epithelial cell integrity; a lethal RNAi phenotype in *C. elegans* during molting reflects disruption of the hypodermis<sup>32</sup>. Gene amplification of the tetraspanins has been recently documented in the genome of a flatworm<sup>33</sup>, suggesting a critical role in helminth physiology beyond molting. The Zinc finger C2H2 type domain is enriched in *P. pacificus* genome compared to *C. elegans*. Calycins, largely represented by lipocalins, are expressed in body wall muscle, seam and somatic cells in *C. elegans* and are involved in locomotion. Thus, RNAi knockdown predictably causes abnormalities in locomotion, larval development and growth (e.g.<sup>34</sup>).

Finally, 11 of the 85 scNOG genes were associated with 12 IPR domains that were only represented once in the whole *T. spiralis* genome. Hence, functions related to these 12 IPR domains are singularly related to scNOGs. Predicted functions of these scNOGs include four TM proteins involved in metabolite transport, electron transport, DNA repair, and ergosterol biosynthetic process, and three SP proteins annotated as a metalloendoprotease, selenium binding protein or a protein of unknown function.

### **Structural annotation and comparison of the proteins of ORTHOMCL5157 and their interaction partners**

To dissect the functional significance of nematode specific insertions in scNOGs, the three dimensional structure of the electron transfer complex, NADH dehydrogenase (ubiquinone) 1 beta sub-complex 4, which contains well defined insertions was modeled. NADH dehydrogenase (ubiquinone) 1 beta sub-complex 4 has very low homology to protein structures available in the PDB (less than 22% sequence identity, covering around half of the protein), so the *C. elegans* and *B. taurus* orthologs were modeled using the Rosetta3.0 software suite. The *ab initio* portion of the Rosetta3.0 software suite<sup>35-37</sup> was used to predict the structures of the *C. elegans* and *B. taurus* orthologs of NADH dehydrogenase (ubiquinone) 1 beta sub-complex 4. The Rosetta *ab initio* program was run using the AbinitioRelax option which combines an *ab initio* folding algorithm and refinement using the relax algorithm within Rosetta3.0. A total of 40,000 decoys were generated using the full-atom scoring method<sup>38</sup> for each sequence. Several of the decoys with a small radius of gyration and low all-atom energy (i.e. the bottom of the energy well) (**Supplementary Fig. 9**) were compared using two different structural genomics methods, TM-align<sup>39</sup> and MAMMOTH<sup>40</sup>, to determine if a similar fold was present. One decoy from both *C. elegans* and *B. taurus* yielded a significant score with both TM-align (0.46) and MAMMOTH Z-score (4.9), indicating that the proteins have a significant degree of similarity in their folds, despite the large insertion regions in the *C. elegans* sequence. A TM-align score over 0.5 indicates the structures share the same fold, whereas a TM-score below 0.2 indicates no similarity between structures.

The position of the insertions were mapped onto the models generated (**Supplementary Fig. 10**) and are located predominately on the surface of the protein. The secondary structure predictions calculated for the Rosetta *ab initio* program were added to the sequence alignment which was generated by MUSCLE<sup>41</sup> to further dissect the functional importance of the insertion in the nematode proteins. The first insertion region in the *C. elegans* protein has a small amount of helical character based on the prediction from one of the secondary structure predictions. The other programs

predicted a loop structure in this region (only one secondary structure prediction is shown in **Supplementary Fig. 10**). The other two insertion regions in *C. elegans* are toward the end of helices and are in the loop regions, as well.

The functional significance of the insertions in the electron transfer complex was further dissected by comparing interacting proteins. If the surface of a protein changes due to an insertion or deletion, it is likely the surface of an interacting protein will need to change as well. Two protein-protein interaction databases, IntAct<sup>42</sup> and MINT<sup>43</sup>, were used to see if this protein or its orthologs were involved in a protein-protein interaction. The ortholog from *B. taurus* (UniProt ID: P48305) was annotated as involved in two protein-protein interactions within the IntAct database. One interaction was with the acyl carrier protein (UniProtID: P52505) and the other interaction was with Acadv bovine very long chain Acyl-CoA dehydrogenase (UniProtID: P48818). The mouse ortholog (UniProtID: Q9CQC7) interacted with a protein kinase C inhibitor protein (UniProtID: P63101). P48305 is part of a complex, and the complex interacts with P48818. BLASTP was used to find orthologs of these proteins, and MUSCLE was used to do the sequence alignments. P63101 and P52505 did not show significant differences between nematodes and other species. However, orthologs of P48818 in nematodes had deletions relative to non-nematode species (**Supplementary Fig. 10**); this protein-protein interaction was found via anti-bait coimmunoprecipitation<sup>44</sup>. The X-ray crystal structure is available for the *H. sapiens* ortholog of P48818. One of the deletions seen in nematodes is not resolved in the X-ray crystal structure and is likely to be unstructured, whereas the other deletion is in a more structured region and may play a role in the protein-protein interaction (**Supplementary Fig. 10**). Interestingly, this is the opposite of NADH dehydrogenase (ubiquinone) 1 beta sub-complex 4, which contains insertions in nematodes that are not present in non-nematodes. Evolutionarily, a sequence containing amino acid insertions in one protein interaction partner may be compensated by a deletion in the other protein interaction partner. This idea of compensation could provide a means of targeting a protein-protein interaction unique to one species for drug design.

### **Genes encoding predicted signal peptides for secretion (SP), transmembrane domains (TM) or both.**

Identification and characterization of genes encoding proteins that harbor putative amino-terminal signal peptides (SP) and/or transmembrane domains (TM) are of importance in part because of their potential ability to directly interface with the host, hence promote parasites survival and growth by modulating host immunity and other biological functions. To this end, a subset of *T. spiralis* SP and TM containing proteins were identified<sup>45</sup>, and these represent approximately 29% of 15,808 genes in the *T. spiralis* genome (SP 1,075; TM 3,315; SP+TM 329). Expression of these genes was investigated with a database of *T. spiralis* ESTs derived from three life cycle stages; newborn larvae (NBL, 14% of all ESTs), muscle larvae (ML, 71%) and adult parasites (Ad, 14%). Collectively, these ESTs mapped to 4,688 genomic loci, and 29% (370; 1,196; 138) of these loci encode proteins classified as SP, TM or SP+TM, respectively. Therefore, the relative representation of these three categories in the genome (29%) is congruent with genes expressed among the three life cycle stages (29%). A majority of *T. spiralis* SP genes (758/1089) were *T. spiralis*-specific. Among the nematodes, *C. elegans* had more SP and TM genes (~48%) compared to the parasitic nematodes (25-31%). Among the parasites, *M. incognita* had 50% more SP genes compared to the human parasites, and *T. spiralis* had the highest number of TM genes (**Supplementary Fig. 11**).

Based on EST representation, SP, TM, and SP+TM genes are highly expressed making up eight, eight, and seven of the ten most represented genes in the NBL, ML, and Ad EST collections, respectively. The most abundant transcript for NBL (567 ESTs) and ML (1106) mapped to a SP gene of unknown function, while the most abundant Ad transcript (321) was another SP gene of unknown function. Furthermore, 11 of the 14 excretory secreted proteins identified by proteomics analysis of the ML (e.g.<sup>21</sup>) were identified in the *T. spiralis* genes that had ML EST support. Interesting only the identified secreted serine protease<sup>20,46</sup> had orthologous proteins in the other nematode species and *D. melanogaster*, and 5' nucleotidase<sup>47-48</sup> with ortholog only in *D. melanogaster*. The SP genes are especially abundant among Ad ESTs, perhaps a reflection of its ability to adapt to most vertebrate hosts. Muscle larvae originated EST support was observed in 81 of the SP genes, and most of them were of unknown function as only 22% had GO associations. The most abundant ML-specific EST to which a function could be inferred was an aspartic-type endopeptidase (22 ESTs), known to facilitate hemoglobin digestion in the blood-feeding nematodes<sup>49</sup>, or tissue degradation during the larvae migration in the host in non-blood-feeders (e.g.<sup>30,50</sup>).

### **Metabolic pathway analysis**

The gene products were associated with a specific biochemical pathway using the KEGG pathway mappings<sup>51</sup>. WU-BLAST matches of the genes against KEGG database version 46.0 was used for pathway mapping with a filter of 1e-10. **Supplementary Table 13** online lists mappings for the top scoring and protein hits to the KEGG enzymes that meet the E-value filter. An example of the pan-phylum NemaPath viewer (<sup>52</sup>; <http://nematode-dev/KEGGscan/cgi->

[bin/KEGGscan\\_pathway\\_tsp\\_4\\_species.cgi](#)) is shown in **Supplementary Fig. 13**; and an example of the NemaCyc viewer (<http://pathwaytools.wustl.edu>) in **Supplementary Fig. 14**. The *C. elegans* NemaCyc viewer was generated by using the KEGG annotation of *C. elegans* genes (KEGG v.50), and parsed each GenBank chromosome file to add in the EC annotations. For the *T. spiralis* NemaCyc mapping a blastp alignment of the KEGG genesDB against the predicted *T. spiralis* genes was performed and e-value scores stronger than  $1e-10$  were considered. These genes were then annotated in SpirCyc based on that blastp alignment.

Detailed comparisons identified taxonomically restricted pathways. For example, pathways with more KOs in *T. spiralis* compared to *C. elegans* was the starch and sucrose metabolism (**Supplementary Fig. 13**). Of the 28 KOs associated with nematode enzymes in this pathway, 15 were CNKs, indicating sub-pathways that are taxonomically restricted. The glucose-6-phosphatase was only present in *T. spiralis*, and detailed analysis identified conservation of this enzyme only among Dorylaimia nematodes (e.g. the whipworm *Trichuris muris* and the plant-parasite *Xiphinema index*). A sub-pathway contained 4 enzymes specific only to the plant-parasitic nematode *M. incognita*, including a cascade of pectin-hydrolysis enzymes, endoglucanase and galacturonidase. All of these enzymes are known to facilitate invasion of the plant by the plant-parasitic nematodes through degradation of the main components of the plant cell wall<sup>53</sup>.

#### IV – References for supplementary information:

1. Mitreva, M. & Jasmer, D.P. Biology and genome of *Trichinella spiralis*. (2006).
2. Simon, S.A., *et al.* Short-Read Sequencing Technologies for Transcriptional Analyses. *Annual Review of Plant Biology* **60**, 305-333 (2009).
3. Wang, D.Y., Kumar, S. & Hedges, S.B. Divergence time estimates for the early history of animal phyla and the origin of plants, animals and fungi. *Proc Biol Sci* **266**, 163-171 (1999).
4. Blaxter, M.L., *et al.* A molecular evolutionary framework for the phylum Nematoda. *Nature*, 71 - 75 (1998).
5. Holterman, M., *et al.* A ribosomal DNA-based framework for the detection and quantification of stress-sensitive nematode families in terrestrial habitats. *Molecular Ecology Resources* **8**, 23-34 (2008).
6. Holterman, M., *et al.* Phylum-Wide Analysis of SSU rDNA Reveals Deep Phylogenetic Relationships among Nematodes and Accelerated Evolution toward Crown Clades. *Mol Biol Evol* **23**, 1792-1800 (2006).
7. Meldal, B.H., *et al.* An improved molecular phylogeny of the Nematoda with special emphasis on marine taxa. *Mol Phylogenet Evol* **42**, 622-636 (2007).
8. The *C. elegans* Sequencing Consortium. Genome Sequence of the Nematode *C. elegans*: A Platform for Investigating Biology. *Science* **282**, 2012-2018 (1998).
9. Stein, L.D., *et al.* The genome sequence of *Caenorhabditis briggsae*: a platform for comparative genomics. *PLoS Biol* **1**, E45 (2003).
10. Dieterich, C., *et al.* The *Pristionchus pacificus* genome provides a unique perspective on nematode lifestyle and parasitism. *Nat Genet* **40**, 1193-1198 (2008).
11. Abad, P., *et al.* Genome sequence of the metazoan plant-parasitic nematode *Meloidogyne incognita*. *Nat Biotech* **26**, 909-915 (2008).
12. Opperman, C.H., *et al.* Sequence and genetic map of *Meloidogyne hapla*: A compact nematode genome for plant parasitism. *Proceedings of the National Academy of Sciences*, - (2008).
13. Ghedin, E., *et al.* Draft genome of the filarial nematode parasite *Brugia malayi*. *Science* **317**, 1756 - 1760 (2007).
14. ManWarren, T., *et al.* Invasion of intestinal epithelia in vitro by the parasitic nematode *Trichinella spiralis*. *Infect Immun* **65**, 4806-4812 (1997).
15. Jasmer, D.P. *Trichinella spiralis*: Altered expression of muscle proteins in trichinosis. *Experimental Parasitology* **70**, 452-465 (1990).
16. Jasmer, D.P. *Trichinella spiralis* infected skeletal muscle cells: arrest in G2/M is associated with the loss of muscle gene expression. *J Biol Chem* **268**, 785-793 (1993).
17. Despommier, D.D., Gold, A.M., Buck, S.W., Capo, V. & Silberstein, D. *Trichinella spiralis*: Secreted antigen of the infective L1 larva localizes to the cytoplasm and nucleoplasm of infected host cells. *Exp Parasitol* **71**, 27-38 (1990).
18. Wisnewski, N., McNeil, M., Grieve, R.B. & Wassom, D.L. Characterization of novel fucosyl- and tyvelosyl-containing glycoconjugates from *Trichinella spiralis* muscle stage larvae. *Mol Biochem Parasitol* **61**, 25-35 (1993).
19. Yao, C. & Jasmer, D.P. *Trichinella spiralis* infected muscle cells: high levels of RNA polymerase II in nuclear speckle domains and depletion by mebendazole treatment. *Infect Immun* **69**, 4065-4071 (2001).
20. Romaris, F., *et al.* A putative serine protease among the excretory-secretory glycoproteins of L1 *Trichinella spiralis*. *Mol Biochem Parasitol* **122**, 149-160 (2002).
21. Robinson, M.W. & Connolly, B. Proteomic analysis of the excretory-secretory proteins of the *Trichinella spiralis* L1 larva, a nematode parasite of skeletal muscle. *PROTEOMICS* **5**, 4525-4532 (2005).
22. Searcy, D.G. & MacInnis, A.J. Measurements by DNA renaturation of the genetic basis of parasitic reduction. *Evolution* **24**, 796-806 (1970).
23. Mitreva, M. & Jasmer, D.P. Advances on sequencing the genome of the Clade I nematode *Trichinella spiralis*. *Parasitology* **135**, 869-880 (2008).
24. Zarlenga, D.S., Rosenthal, B., Hoberg, E. & Mitreva, M. Integrating genomics and phylogenetics in understanding the history of *Trichinella* species. *Veterinary Parasitology* **159**, 210-213 (2009).
25. Jurka, J., *et al.* Repbase Update, a database of eukaryotic repetitive elements. *Cytogenet Genome Res* **110**, 462-467 (2005).
26. Pettitt, J., Muller, B., Stansfield, I. & Connolly, B. Spliced leader trans-splicing in the nematode *Trichinella spiralis* uses highly polymorphic, noncanonical spliced leaders. *RNA* **14**, 760-770 (2008).
27. Mitreva, M., *et al.* Codon usage patterns in Nematoda: analysis based on over 25 million codons in thirty-two species. *Genome Biology* **7**, R75 (2006).

28. Li, L., Stoeckert, C.J., Jr. & Roos, D.S. OrthoMCL: Identification of Ortholog Groups for Eukaryotic Genomes. *Genome Res.* **13**, 2178-2189 (2003).
29. Vassiliatis, D.M., *et al.* Analysis of a 43-kDa glycoprotein from the intracellular parasitic nematode *Trichinella spiralis*. *J Biol Chem* **267**, 18459-18465 (1992).
30. Mitreva, M., *et al.* Gene discovery in the adenophorean nematode *Trichinella spiralis*: an analysis of transcription from three life cycle stages. *Mol Biochem Parasitol* **137**, 277 - 291 (2004).
31. Jasmer, D.P., Dautova Mitreva, M. & McCarter, J.P. mRNA sequences for *Haemonchus contortus* intestinal cathepsin B-like cysteine proteases display an extreme in abundance and diversity compared with other adult mammalian parasitic nematodes. *Mol Biochem Parasitol* **137**, 297-305 (2004).
32. Moribe, H., *et al.* Tetraspanin protein (TSP-15) is required for epidermal integrity in *Caenorhabditis elegans*. *J Cell Sci* **117**, 5209-5220 (2004).
33. Berriman, M., *et al.* The genome of the blood fluke *Schistosoma mansoni*. *Nature* **460**, 352-358 (2009).
34. Cronin, C.J., *et al.* An automated system for measuring parameters of nematode sinusoidal movement. *BMC Genet* **6**, 5 (2005).
35. Andre, I., Bradley, P., Wang, C. & Baker, D. Prediction of the structure of symmetrical protein assemblies. *Proc Natl Acad Sci U S A* **104**, 17656-17661 (2007).
36. Rohl, C.A., Strauss, C.E., Misura, K.M. & Baker, D. Protein structure prediction using Rosetta. *Methods Enzymol* **383**, 66-93 (2004).
37. Qian, B., *et al.* High-resolution structure prediction and the crystallographic phase problem. *Nature* **450**, 259-264 (2007).
38. Misura, K.M., Chivian, D., Rohl, C.A., Kim, D.E. & Baker, D. Physically realistic homology models built with ROSETTA can be more accurate than their templates. *Proc Natl Acad Sci U S A* **103**, 5361-5366 (2006).
39. Zhang, Y. & Skolnick, J. TM-align: a protein structure alignment algorithm based on the TM-score. *Nucleic Acids Res* **33**, 2302-2309 (2005).
40. Ortiz, A.R., Strauss, C.E. & Olmea, O. MAMMOTH (matching molecular models obtained from theory): an automated method for model comparison. *Protein Sci* **11**, 2606-2621 (2002).
41. Edgar, R.C. MUSCLE: multiple sequence alignment with high accuracy and high throughput. *Nucleic Acids Res* **32**, 1792-1797 (2004).
42. Kerrien, S., *et al.* IntAct--open source resource for molecular interaction data. *Nucleic Acids Res* **35**, D561-565 (2007).
43. Chatr-aryamontri, A., *et al.* MINT: the Molecular INTeraction database. *Nucleic Acids Res* **35**, D572-574 (2007).
44. Schilling, B., *et al.* Proteomic analysis of succinate dehydrogenase and ubiquinol-cytochrome c reductase (Complex II and III) isolated by immunoprecipitation from bovine and mouse heart mitochondria. *Biochim Biophys Acta* **1762**, 213-222 (2006).
45. Kall, L., Krogh, A. & Sonnhammer, E.L.L. A Combined Transmembrane Topology and Signal Peptide Prediction Method. *Journal of Molecular Biology* **338**, 1027-1036 (2004).
46. Nagano, I., Wu, Z., Nakada, T., Boonmars, T. & Takahashi, Y. Molecular cloning and characterization of a serine proteinase gene of *Trichinella spiralis*. *J Parasitol* **89**, 92-98 (2003).
47. Gounaris, K. Nucleotidase cascades are catalyzed by secreted proteins of the parasitic nematode *Trichinella spiralis*. *Infect Immun* **70**, 4917-4924 (2002).
48. Gounaris, K. & Selkirk, M.E. Parasite nucleotide-metabolizing enzymes and host purinergic signalling. *Trends Parasitol* **21**, 17-21 (2005).
49. Ranjit, N., *et al.* Proteolytic degradation of hemoglobin in the intestine of the human hookworm *Necator americanus*. *J Infect Dis* **199**, 904-912 (2009).
50. Jolodar, A., *et al.* *Onchocerca volvulus*: expression and immunolocalization of a nematode cathepsin D-like lysosomal aspartic protease. *Exp Parasitol* **107**, 145-156 (2004).
51. Kanehisa, M., *et al.* KEGG for linking genomes to life and the environment. *Nucleic Acids Res* **36**, D480 - D484 (2008).
52. Wylie, T., *et al.* NemaPath: online exploration of KEGG-based metabolic pathways for nematodes. *BMC Genomics* **9**, 525 (2008).
53. Popeijus, H., *et al.* Degradation of plant cell walls by a nematode. *Nature* **406**, 36 - 37 (2000).
